# Supplementary material for: Four-component quinazoline synthesis from simple anilines, aromatic aldehydes and ammonium iodide under metal-free conditions
Source: Royal Society of Chemistry journal article supplement (doi:10.1039/c8gc02654h), 2018-01-01

## Supporting Information

### **Four-component quinazolines synthesis from simple anilines, aromatic aldehydes and ammonium iodide under metal-free conditions**

Jinjin Chen,<sup>a</sup> Dan Chang,<sup>a</sup> Fuhong Xiao,<sup>a\*</sup> Guo-Jun Deng<sup>a,b\*</sup>

<sup>a</sup> Key Laboratory for Green Organic Synthesis and Application of Hunan Province, Key Laboratory of Environmentally Friendly Chemistry and Application of Ministry of Education, College of Chemistry, Xiangtan University, Xiangtan 411105, China. E-mail: gjdeng@xtu.edu.cn; fhxiao@xtu.edu.cn

<sup>b</sup> Beijing National Laboratory for Molecular Sciences (BNLMS), Institute of Chemistry Chinese Academy of Sciences, Beijing 100190 (P.R. China)

### Table of Contents

|                                                                        |              |
|------------------------------------------------------------------------|--------------|
| <b>1. General information</b>                                          | <b>2</b>     |
| <b>2. General procedure from anilines</b>                              | <b>2</b>     |
| <b>3. General procedure from nitroarenes</b>                           | <b>2</b>     |
| <b>4. Characterization data of products</b>                            | <b>2-23</b>  |
| <b>5. References</b>                                                   | <b>23</b>    |
| <b>6. <sup>1</sup>H and <sup>13</sup>C NMR spectra of all products</b> | <b>24-67</b> |

## 1. General information

All reactions were carried out under an atmosphere of oxygen unless otherwise noted. Column chromatography was performed using silica gel (200-300 mesh).  $^1\text{H}$  NMR and  $^{13}\text{C}$  NMR spectra were recorded on Bruker-AV (400 and 100 MHz, respectively) instrument internally referenced to tetramethylsilane (TMS) or chloroform. Mass spectra was measured on Agilent 5975 GC-MS instrument (EI). High-resolution mass spectra were recorded at Keecloud (Shanghai) Biotechnology co. LTD. HRMS was conducted using electrospraying ionization (ESI) and was performed on a Thermo Scientific LTQ Orbitrap XL. The structure of known compounds were further corroborated by comparing their  $^1\text{H}$  NMR,  $^{13}\text{C}$  NMR data and MS data with those of literature. All reagents were obtained from commercial suppliers and used without further purification unless otherwise noted.

## 2. General procedure for the synthesis of quinazolines from anilines

A 10 mL oven-dried reaction vessel was charged with anilines (0.2 mmol), benzaldehydes (0.6 mmol), ammonium iodide (0.24 mmol), DMSO (0.2 mmol) and chlorobenzene (0.5 mL). The reaction vessel was purged with oxygen for three times and stirred at 150 °C for 12 h. After cooling to room temperature, the volatiles were removed under reduced pressure. The residue was purified by column chromatography on silica gel to give the products.

## 3. General procedure for the synthesis of quinazolines from nitroarenes

A 10 mL oven-dried reaction vessel was charged with nitrobenzene (0.2 mmol), benzaldehydes (0.6 mmol), ammonium iodide (0.24 mmol), iron powder (0.4 mmol) and chlorobenzene (0.5 mL). The reaction vessel was stirred at 150 °C for 12 h under air. After cooling to room temperature, the volatiles were removed under reduced pressure. The residue was purified by column chromatography on silica gel to give the desired product.

## 4. Characterization of products

### 2,4-Diphenylquinazoline (3aa, CAS: 31730-65-1)<sup>[1]</sup>

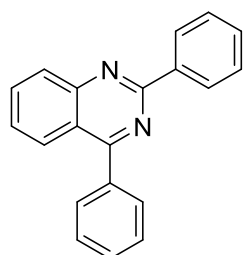

The reaction was conducted with aniline (18.2  $\mu\text{L}$ , 0.2 mmol), benzaldehyde (61.2  $\mu\text{L}$ , 0.6 mmol) and ammonium iodide (34.8 mg, 0.24 mmol). The residue was purified by column chromatography on silica gel (petroleum ether/ethyl acetate = 100:1) to give **3aa** as white solid; yield: 47.5 mg (85%), mp 114-116 °C.

$^1\text{H}$  NMR (400 MHz,  $\text{CDCl}_3$ , ppm)  $\delta$  8.71 (d,  $J = 7.1$  Hz, 2H), 8.19 (d,  $J = 8.5$  Hz, 1H), 8.14 (d,  $J = 8.5$  Hz, 1H), 7.90 (s, 3H), 7.64-7.49 (m, 7H);  $^{13}\text{C}$  NMR (100 MHz,  $\text{CDCl}_3$ , ppm)  $\delta$  168.2, 160.2, 151.9, 138.2, 137.6, 133.5, 130.5, 130.1, 129.9, 129.1, 128.6, 128.5, 127.0, 121.6.

**6-Methyl-2,4-diphenylquinazoline (3ba, CAS: 16107-83-8)<sup>[1]</sup>**

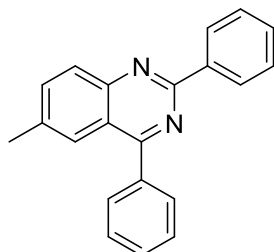

The reaction was conducted with 4-methylaniline (21.4 mg, 0.2 mmol), benzaldehyde (61.2  $\mu\text{L}$ , 0.6 mmol) and ammonium iodide (34.8 mg, 0.24 mmol). The residue was purified by column chromatography on silica gel (petroleum ether/ethyl acetate = 50:1) to give **3ba** as yellow solid; yield: 45.1 mg (76%), mp 173-176  $^\circ\text{C}$ .

$^1\text{H}$  NMR (400 MHz,  $\text{CDCl}_3$ , ppm)  $\delta$  8.68 (d,  $J = 6.8$  Hz, 2H), 8.08 (d,  $J = 8.3$  Hz, 1H), 7.88 (s, 3H), 7.73 (d,  $J = 8.4$  Hz, 1H), 7.60 (s, 3H), 7.53-7.51 (m, 3H), 2.52 (s, 3H);  $^{13}\text{C}$  NMR (100 MHz,  $\text{CDCl}_3$ , ppm)  $\delta$  167.5, 159.5, 150.5, 138.3, 137.8, 137.1, 135.7, 130.2, 130.1, 129.7, 128.8, 128.5, 125.5, 121.6, 21.8.

**6-Ethyl-2,4-diphenylquinazoline (3ca)**

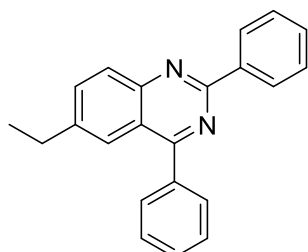

The reaction was conducted with 4-ethylaniline (25.0  $\mu\text{L}$ , 0.2 mmol), benzaldehyde (61.2  $\mu\text{L}$ , 0.6 mmol) and ammonium iodide (34.8 mg, 0.24 mmol). The residue was purified by column chromatography on silica gel (petroleum ether/ethyl acetate = 50:1) to give **3ca** as white solid; yield: 55.2 mg (89%), mp 102-105  $^\circ\text{C}$ .

$^1\text{H}$  NMR (400 MHz,  $\text{CDCl}_3$ , ppm)  $\delta$  8.68 (d,  $J = 7.1$  Hz, 2H), 8.10 (d,  $J = 8.3$  Hz, 1H), 7.90 (s, 3H), 7.77 (d,  $J = 8.6$  Hz, 1H), 7.61 (s, 3H), 7.53-7.51 (m, 3H), 2.82 (q,  $J = 7.1$  Hz, 2H), 1.30 (t,  $J = 7.0$  Hz, 3H);  $^{13}\text{C}$  NMR (100 MHz,  $\text{CDCl}_3$ , ppm)  $\delta$  167.6, 159.6, 150.7, 143.3, 138.3, 137.8, 134.6, 130.2, 130.1, 129.7, 128.9, 128.5, 124.3, 121.6, 29.1, 15.4; HRMS ( $m/z$ ): calcd for  $\text{C}_{22}\text{H}_{19}\text{N}_2$  [ $\text{M}+\text{H}$ ] $^+$  311.1543, found 311.1541.

**6-Isopropyl-2,4-diphenylquinazoline (3da, CAS: 106910-93-4)<sup>[2]</sup>**

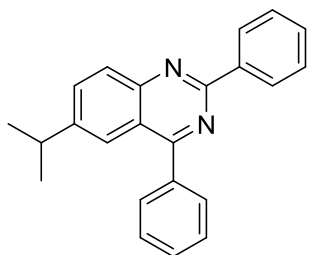

The reaction was conducted with 4-isopropylaniline (27.5  $\mu\text{L}$ , 0.2 mmol), benzaldehyde (61.2  $\mu\text{L}$ , 0.6 mmol) and ammonium iodide (34.8 mg, 0.24 mmol). The residue was purified by column chromatography on silica gel (petroleum ether/ethyl acetate = 50:1) to give **3da** as yellow solid; yield: 58.5 mg (90%), mp 58-60  $^{\circ}\text{C}$ .

$^1\text{H}$  NMR (400 MHz,  $\text{CDCl}_3$ , ppm)  $\delta$  8.69 (d,  $J = 6.6$  Hz, 2H), 8.16 (d,  $J = 7.2$  Hz, 1H), 7.91 (d,  $J = 8.3$  Hz, 3H), 7.83 (d,  $J = 8.4$  Hz, 1H), 7.61 (s, 3H), 7.52 (d,  $J = 8.6$  Hz, 3H), 3.08 (m, 1H), 1.32 (d,  $J = 6.6$  Hz, 6H);  $^{13}\text{C}$  NMR (100 MHz,  $\text{CDCl}_3$ , ppm)  $\delta$  167.7, 159.6, 150.8, 147.8, 138.3, 137.8, 133.2, 130.2, 130.1, 129.8, 129.0, 128.5, 128.5, 128.4, 123.0, 121.6, 34.3, 23.7.

#### 6-(*tert*-Butyl)-2,4-diphenylquinazoline (3ea)

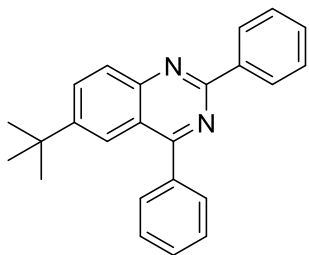

The reaction was conducted with 4-(*tert*-butyl)aniline (31.8  $\mu\text{L}$ , 0.2 mmol), benzaldehyde (61.2  $\mu\text{L}$ , 0.6 mmol) and ammonium iodide (34.8 mg, 0.24 mmol). The residue was purified by column chromatography on silica gel (petroleum ether/ethyl acetate = 50:1) to give **3ea** as yellow liquid; yield: 64.3 mg (95%).

$^1\text{H}$  NMR (400 MHz,  $\text{CDCl}_3$ , ppm)  $\delta$  8.69 (d,  $J = 6.9$  Hz, 2H), 8.14 (d,  $J = 7.9$  Hz, 1H), 8.09 (s, 1H), 8.01 (d,  $J = 8.9$  Hz, 1H), 7.93 (d,  $J = 5.7$  Hz, 2H), 7.61 (s, 3H), 7.53 (d,  $J = 8.5$  Hz, 3H), 1.39 (s, 9H);  $^{13}\text{C}$  NMR (100 MHz,  $\text{CDCl}_3$ , ppm)  $\delta$  167.8, 159.8, 150.5, 145.0, 138.3, 137.8, 132.4, 130.2, 130.1, 129.8, 128.9, 128.6, 128.5, 128.4, 121.7, 121.2, 35.1, 31.0; HRMS ( $m/z$ ): calcd for  $\text{C}_{24}\text{H}_{23}\text{N}_2$  [ $\text{M}+\text{H}$ ] $^+$  339.1856, found 339.1852.

#### 6-Methoxy-2,4-diphenylquinazoline (3fa, CAS: 1315314-52-3)<sup>[1]</sup>

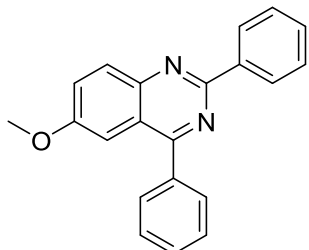

The reaction was conducted with 4-methoxyaniline (24.6 mg, 0.2 mmol), benzaldehyde (61.2  $\mu$ L, 0.6 mmol) and ammonium iodide (34.8 mg, 0.24 mmol). The residue was purified by column chromatography on silica gel (petroleum ether/ethyl acetate = 20:1) to give **3fa** as yellow solid; yield: 53.6 mg (86%), mp 138-140  $^{\circ}$ C.

$^1\text{H}$  NMR (400 MHz,  $\text{CDCl}_3$ , ppm)  $\delta$  8.66 (d,  $J$  = 7.1 Hz, 2H), 8.11 (d,  $J$  = 8.4 Hz, 1H), 7.91 (d,  $J$  = 5.8 Hz, 2H), 7.75 – 7.46 (m, 7H), 7.40 (s, 1H), 3.86 (s, 3H);  $^{13}\text{C}$  NMR (100 MHz,  $\text{CDCl}_3$ , ppm)  $\delta$  166.5, 158.5, 157.9, 148.0, 138.2, 137.9, 130.5, 130.0, 129.8, 129.7, 128.5, 128.4, 128.2, 126.1, 122.3, 104.2, 55.5.

### 2,4,6-Triphenylquinazoline (3ga)

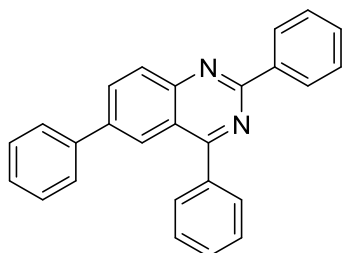

The reaction was conducted with [1,1'-biphenyl]-4-amine (34.0 mg, 0.2 mmol), benzaldehyde (61.2  $\mu$ L, 0.6 mmol) and ammonium iodide (34.8 mg, 0.24 mmol). The residue was purified by column chromatography on silica gel (petroleum ether/ethyl acetate = 30:1) to give **3ga** as white solid; yield: 58.5 mg (82%), mp 143-145  $^{\circ}$ C.

$^1\text{H}$  NMR (400 MHz,  $\text{CDCl}_3$ , ppm)  $\delta$  8.72 (d,  $J$  = 6.6 Hz, 2H), 8.31 (s, 1H), 8.26 (d,  $J$  = 8.7 Hz, 1H), 8.17 (d,  $J$  = 8.6 Hz, 1H), 7.94 (d,  $J$  = 5.6 Hz, 2H), 7.67-7.60 (m, 5H), 7.57-7.45 (m, 5H), 7.40 (t,  $J$  = 7.1 Hz, 1H);  $^{13}\text{C}$  NMR (100 MHz,  $\text{CDCl}_3$ , ppm)  $\delta$  168.3, 160.1, 151.3, 139.9, 139.8, 138.1, 137.6, 133.2, 130.5, 130.2, 129.9, 129.5, 129.0, 128.6, 128.6, 128.5, 127.9, 127.3, 124.5, 121.8; HRMS ( $m/z$ ): calcd for  $\text{C}_{26}\text{H}_{19}\text{N}_2$   $[\text{M}+\text{H}]^+$  359.1543, found 359.1550.

### 6-Chloro-2,4-diphenylquinazoline (3ha, CAS: 30169-34-7)<sup>[1]</sup>

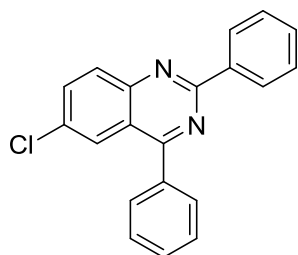

The reaction was conducted with 4-chloroaniline (25.5 mg, 0.2 mmol), benzaldehyde (61.2  $\mu$ L, 0.6 mmol) and ammonium iodide (34.8 mg, 0.24 mmol). The residue was purified by column chromatography on silica gel (petroleum ether/ethyl acetate = 100:1) to give **3ha** as white solid; yield: 40.1 mg (63%), mp 193-195  $^{\circ}$ C.

$^1\text{H}$  NMR (400 MHz,  $\text{CDCl}_3$ , ppm)  $\delta$  8.69 (d,  $J$  = 7.9 Hz, 2H), 8.18-8.07 (m, 2H), 7.87 (d,  $J$  = 3.7 Hz, 2H), 7.83 (d,  $J$  = 9.0 Hz, 1H), 7.66-7.61 (m, 3H), 7.56-7.50 (m, 3H);  $^{13}\text{C}$  NMR (100 MHz,

CDCl<sub>3</sub>, ppm)  $\delta$  167.5, 160.4, 150.4, 137.7, 137.0, 134.5, 132.6, 130.8, 130.7, 130.2, 130.0, 128.7, 128.6, 128.5, 125.7, 122.1.

**6-Bromo-2,4-diphenylquinazoline (3ia, CAS: 1229609-99-7)<sup>[1]</sup>**

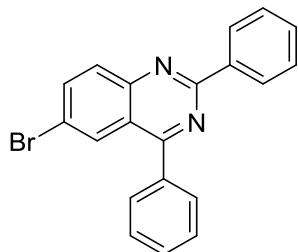

The reaction was conducted with 4-bromoaniline (34.0 mg, 0.2 mmol), benzaldehyde (61.2  $\mu$ L, 0.6 mmol) and ammonium iodide (34.8 mg, 0.24 mmol). The residue was purified by column chromatography on silica gel (petroleum ether/ethyl acetate = 100:1) to give **3ia** as white solid; yield: 49.8 mg (69%), mp 202-204 °C.

<sup>1</sup>H NMR (400 MHz, CDCl<sub>3</sub>, ppm)  $\delta$  8.69 (d, *J* = 7.9 Hz, 2H), 8.27 (s, 1H), 8.06 (d, *J* = 8.9 Hz, 1H), 7.96 (d, *J* = 9.0 Hz, 1H), 7.87 (d, *J* = 3.6 Hz, 2H), 7.67-7.61 (m, 3H), 7.57-7.49 (m, 3H); <sup>13</sup>C NMR (100 MHz, CDCl<sub>3</sub>, ppm)  $\delta$  167.4, 160.4, 150.6, 137.7, 137.0, 137.0, 130.9, 130.8, 130.2, 130.0, 129.1, 128.7, 128.7, 128.6, 122.6, 120.6.

**2,4-Diphenylquinazolin-6-ol (3ja)**

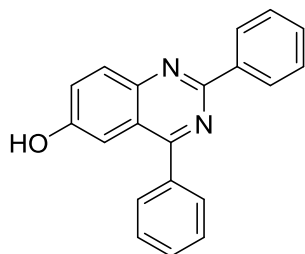

The reaction was conducted with 4-aminophenol (21.8 mg, 0.2 mmol), benzaldehyde (61.2  $\mu$ L, 0.6 mmol) and ammonium iodide (34.8 mg, 0.24 mmol). The residue was purified by column chromatography on silica gel (petroleum ether/ethyl acetate = 10:1) to give **3ja** as yellow solid; yield: 29.5 mg (49%), mp 213-216 °C.

<sup>1</sup>H NMR (400 MHz, CDCl<sub>3</sub>, ppm)  $\delta$  8.58 (d, *J* = 6.5 Hz, 2H), 8.10 (t, *J* = 9.3 Hz, 2H), 7.78 (d, *J* = 3.7 Hz, 2H), 7.52-7.45 (m, 7H), 7.36 (d, *J* = 2.6 Hz, 1H); <sup>13</sup>C NMR (100 MHz, CDCl<sub>3</sub>, ppm)  $\delta$  171.8, 166.9, 158.4, 154.7, 137.9, 137.5, 133.8, 130.2, 129.8, 129.3, 128.5, 128.5, 128.4, 125.9, 122.5, 108.4; HRMS (m/z): calcd for C<sub>20</sub>H<sub>15</sub>N<sub>2</sub>O [M+H]<sup>+</sup> 299.1179, found 299.1180.

**7-Methyl-2,4-diphenylquinazoline (3ka, CAS: 16151-75-0)<sup>[1]</sup>**

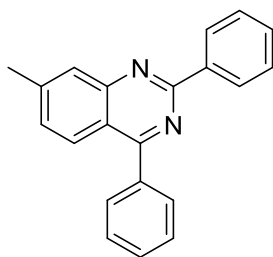

The reaction was conducted with 3-methylaniline (21.6  $\mu\text{L}$ , 0.2 mmol), benzaldehyde (61.2  $\mu\text{L}$ , 0.6 mmol) and ammonium iodide (34.8 mg, 0.24 mmol). The residue was purified by column chromatography on silica gel (petroleum ether/ethyl acetate = 50:1) to give **3ka** as white solid; yield: 44.6 mg (75%), mp 159-162  $^{\circ}\text{C}$ .

$^1\text{H}$  NMR (400 MHz,  $\text{CDCl}_3$ , ppm)  $\delta$  8.69 (d,  $J = 6.9$  Hz, 2H), 8.02 (d,  $J = 8.4$  Hz, 1H), 7.97 (s, 1H), 7.89 (d,  $J = 3.2$  Hz, 2H), 7.59 (s, 3H), 7.52 (d,  $J = 7.1$  Hz, 3H), 7.38 (d,  $J = 8.5$  Hz, 1H), 2.61 (s, 3H);  $^{13}\text{C}$  NMR (100 MHz,  $\text{CDCl}_3$ , ppm)  $\delta$  167.6, 160.2, 152.1, 144.4, 138.2, 137.7, 130.3, 130.1, 129.7, 129.2, 128.5, 128.5, 128.4, 128.0, 126.5, 119.7, 21.99.

#### 7-Chloro-2,4-diphenylquinazoline (**3la**)<sup>[3]</sup>

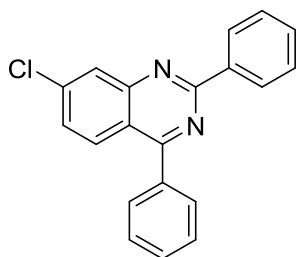

The reaction was conducted with 3-chloroaniline (21.0  $\mu\text{L}$ , 0.2 mmol), benzaldehyde (61.2  $\mu\text{L}$ , 0.6 mmol) and ammonium iodide (34.8 mg, 0.24 mmol). The residue was purified by column chromatography on silica gel (petroleum ether/ethyl acetate = 50:1) to give **3la** as white solid; yield: 41.2 mg (65%), mp 156-158  $^{\circ}\text{C}$ .

$^1\text{H}$  NMR (400 MHz,  $\text{CDCl}_3$ , ppm)  $\delta$  8.70 (d,  $J = 7.8$  Hz, 2H), 8.20 (s, 1H), 8.07 (d,  $J = 8.9$  Hz, 1H), 7.86 (d,  $J = 6.7$  Hz, 2H), 7.61 (s, 3H), 7.56-7.48 (m, 4H);  $^{13}\text{C}$  NMR (100 MHz,  $\text{CDCl}_3$ , ppm)  $\delta$  168.2, 161.0, 152.5, 139.7, 137.6, 137.2, 130.8, 130.2, 130.1, 128.7, 128.6, 128.5, 128.4, 128.0, 127.9, 120.0.

#### 8-Methyl-2,4-diphenylquinazoline (**3ma**, CAS: 106910-91-2)<sup>[4]</sup>

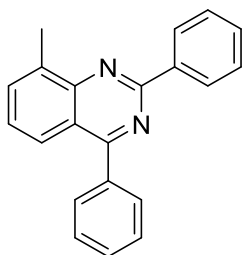

The reaction was conducted with 2-methylaniline (21.3  $\mu\text{L}$ , 0.2 mmol), benzaldehyde (61.2  $\mu\text{L}$ , 0.6 mmol) and ammonium iodide (34.8 mg, 0.24 mmol). The residue was purified by column chromatography on silica gel (petroleum ether/ethyl acetate = 50:1) to give **3ma** as yellow solid; yield: 43.2 mg (73%), mp 106-109  $^{\circ}\text{C}$ .

$^1\text{H}$  NMR (400 MHz,  $\text{CDCl}_3$ , ppm)  $\delta$  8.75 (d,  $J = 7.1$  Hz, 2H), 7.95 (d,  $J = 8.6$  Hz, 1H), 7.88 (d,  $J = 3.5$  Hz, 2H), 7.73 (d,  $J = 6.7$  Hz, 1H), 7.61-7.50 (m, 6H), 7.43 (t,  $J = 7.7$  Hz, 1H), 2.92 (s, 3H);  $^{13}\text{C}$  NMR (100 MHz,  $\text{CDCl}_3$ , ppm)  $\delta$  168.3, 158.9, 150.8, 138.5, 138.0, 137.3, 133.2, 130.3, 130.1, 129.6, 128.6, 128.4, 128.3, 126.3, 124.6, 121.5, 17.50.

### 8-Chloro-2,4-diphenylquinazoline (3na)

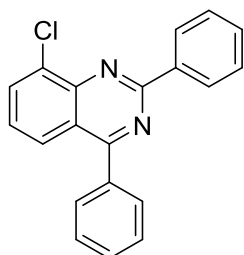

The reaction was conducted with 2-chloroaniline (21.0  $\mu\text{L}$ , 0.2 mmol), benzaldehyde (61.2  $\mu\text{L}$ , 0.6 mmol) and ammonium iodide (34.8 mg, 0.24 mmol). The residue was purified by column chromatography on silica gel (petroleum ether/ethyl acetate = 50:1) to give **3na** as white solid; yield: 31.3 mg (50%), mp 159-161  $^{\circ}\text{C}$ .

$^1\text{H}$  NMR (400 MHz,  $\text{CDCl}_3$ , ppm)  $\delta$  8.77 (d,  $J = 5.5$  Hz, 2H), 8.04 (d,  $J = 8.4$  Hz, 1H), 7.99 (d,  $J = 7.4$  Hz, 1H), 7.86 (d,  $J = 4.0$  Hz, 2H), 7.59-7.52 (m, 6H), 7.45 (t,  $J = 7.9$  Hz, 1H);  $^{13}\text{C}$  NMR (100 MHz,  $\text{CDCl}_3$ , ppm)  $\delta$  168.8, 160.5, 148.5, 137.7, 137.3, 133.7, 133.4, 130.9, 130.2, 130.1, 128.9, 128.6, 128.5, 126.5, 126.0, 122.9. HRMS (m/z): calcd for  $\text{C}_{20}\text{H}_{14}\text{ClN}_2$   $[\text{M}+\text{H}]^+$  317.0840, found 317.0846.

### 7,8-Dimethyl-2,4-diphenylquinazoline (3oa)

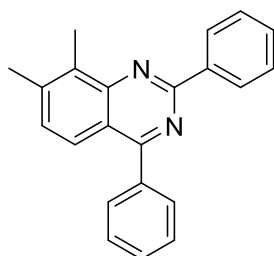

The reaction was conducted with 2,3-dimethylaniline (24.4  $\mu\text{L}$ , 0.2 mmol), benzaldehyde (61.2  $\mu\text{L}$ , 0.6 mmol) and ammonium iodide (34.8 mg, 0.24 mmol). The residue was purified by column chromatography on silica gel (petroleum ether/ethyl acetate = 100:1) to give **3oa** as white solid; yield: 53.2 mg (86%), mp 176-178  $^{\circ}\text{C}$ .

$^1\text{H}$  NMR (400 MHz,  $\text{CDCl}_3$ , ppm)  $\delta$  8.76 (d,  $J = 6.7$  Hz, 2H), 7.86 (d,  $J = 7.7$  Hz, 3H), 7.64-7.46 (m, 6H), 7.35 (d,  $J = 8.6$  Hz, 1H), 2.88 (s, 3H), 2.55 (s, 3H);  $^{13}\text{C}$  NMR (100 MHz,  $\text{CDCl}_3$ , ppm)  $\delta$



168.0, 158.9, 150.6, 141.6, 138.7, 138.1, 134.5, 130.1, 129.6, 129.5, 128.5, 128.4, 128.3, 123.7, 119.9, 20.8, 12.9; HRMS (m/z): calcd for C<sub>22</sub>H<sub>19</sub>N<sub>2</sub> [M+H]<sup>+</sup> 311.1543, found 311.1544.

#### 6,8-Dimethyl-2,4-diphenylquinazoline (3pa)<sup>[5]</sup>

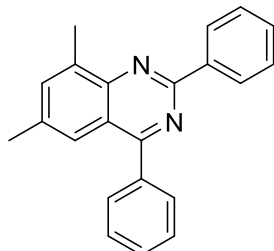

The reaction was conducted with 2,4-dimethylaniline (24.8 μL, 0.2 mmol), benzaldehyde (61.2 μL, 0.6 mmol) and ammonium iodide (34.8 mg, 0.24 mmol). The residue was purified by column chromatography on silica gel (petroleum ether/ethyl acetate = 100:1) to give **3pa** as white solid; yield: 55.4 mg (89%), mp 150-152 °C.

<sup>1</sup>H NMR (400 MHz, CDCl<sub>3</sub>, ppm) δ 8.73 (d, *J* = 7.0 Hz, 2H), 7.87 (d, *J* = 7.6 Hz, 2H), 7.70 (s, 1H), 7.59 (d, *J* = 7.0 Hz, 4H), 7.56-7.46 (m, 3H), 2.89 (s, 3H), 2.47 (s, 3H); <sup>13</sup>C NMR (100 MHz, CDCl<sub>3</sub>, ppm) δ 167.5, 158.3, 149.5, 138.6, 138.2, 137.0, 136.3, 135.6, 130.1, 130.1, 129.5, 128.4, 128.4, 128.4, 123.2, 121.5, 21.9, 17.4.

#### 5,7-Dimethyl-2,4-diphenylquinazoline (3qa)<sup>[4]</sup>

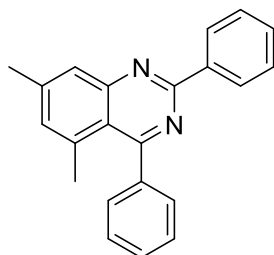

The reaction was conducted with 3,5-dimethylaniline (24.9 μL, 0.2 mmol), benzaldehyde (61.2 μL, 0.6 mmol) and ammonium iodide (34.8 mg, 0.24 mmol). The residue was purified by column chromatography on silica gel (petroleum ether/ethyl acetate = 100:1) to give **3qa** as white solid; yield: 38.3 mg (62%), mp 153-156 °C.

<sup>1</sup>H NMR (400 MHz, CDCl<sub>3</sub>, ppm) δ 8.63 (d, *J* = 8.0 Hz, 2H), 7.83 (s, 1H), 7.60-7.42 (m, 8H), 7.18 (s, 1H), 2.55 (s, 3H), 2.06 (s, 3H); <sup>13</sup>C NMR (100 MHz, CDCl<sub>3</sub>, ppm) δ 168.0, 158.6, 153.3, 143.8, 142.0, 137.9, 135.6, 132.4, 130.2, 128.9, 128.9, 128.5, 128.4, 128.1, 126.4, 120.2, 23.7, 21.8.

#### 2,4-Diphenylbenzo[*h*]quinazoline (3ra, CAS: 36547-38-3)<sup>[1]</sup>

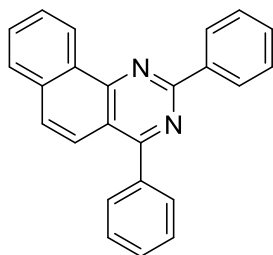

The reaction was conducted with 1-naphthalenamine (28.6 mg, 0.2 mmol), benzaldehyde (61.2  $\mu$ L, 0.6 mmol) and ammonium iodide (34.8 mg, 0.24 mmol). The residue was purified by column chromatography on silica gel (petroleum ether/ethyl acetate = 50:1) to give **3ra** as white solid; yield: 46.4 mg (70%), mp 155-157  $^{\circ}$ C.

$^1\text{H}$  NMR (400 MHz,  $\text{CDCl}_3$ , ppm)  $\delta$  9.56 (d,  $J = 9.6$  Hz, 1H), 8.85 (d,  $J = 6.7$  Hz, 2H), 8.01-7.89 (m, 4H), 7.87-7.75 (m, 3H), 7.65-7.53 (m, 6H);  $^{13}\text{C}$  NMR (100 MHz,  $\text{CDCl}_3$ , ppm)  $\delta$  166.6, 160.0, 151.8, 138.4, 138.0, 134.9, 130.6, 130.4, 130.3, 129.9, 129.6, 128.6, 128.5, 128.4, 127.7, 127.7, 127.2, 125.2, 122.7, 119.1.

### 1,3-Diphenylbenzo[*f*]quinazoline (**3sa**, CAS: 60708-99-8)<sup>[6]</sup>

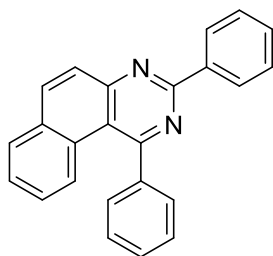

The reaction was conducted with 2-naphthalenamine (28.6 mg, 0.2 mmol), benzaldehyde (61.2  $\mu$ L, 0.6 mmol) and ammonium iodide (34.8 mg, 0.24 mmol). The residue was purified by column chromatography on silica gel (petroleum ether/ethyl acetate = 100:1) to give **3sa** as white solid; yield: 52.1 mg (78%), mp 154-157  $^{\circ}$ C.

$^1\text{H}$  NMR (400 MHz,  $\text{CDCl}_3$ , ppm)  $\delta$  8.70 (d,  $J = 6.6$  Hz, 2H), 8.16 (d,  $J = 9.0$  Hz, 1H), 8.04 (d,  $J = 9.0$  Hz, 1H), 7.89 (d,  $J = 7.9$  Hz, 1H), 7.80 (d,  $J = 8.5$  Hz, 1H), 7.73 (d,  $J = 7.8$  Hz, 2H), 7.58-7.51 (m, 7H), 7.26 (t,  $J = 8.0$  Hz, 1H);  $^{13}\text{C}$  NMR (100 MHz,  $\text{CDCl}_3$ , ppm)  $\delta$  166.1, 159.7, 154.2, 141.8, 137.6, 135.6, 132.7, 130.5, 129.5, 129.1, 129.0, 128.9, 128.7, 128.6, 128.5, 127.7, 127.2, 127.0, 126.4, 119.3.

### 2,4-Diphenylpyrido[2,3-*h*]quinazoline (**3ta**)

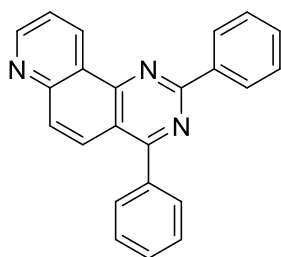

The reaction was conducted with 5-aminoquinoline (28.8 mg, 0.2 mmol), benzaldehyde (61.2  $\mu$ L, 0.6 mmol) and ammonium iodide (34.8 mg, 0.24 mmol). The residue was purified by column chromatography on silica gel (petroleum ether/ethyl acetate = 5:1) to give **3ta** as white solid; yield: 26.6 mg (40%), mp 199-202  $^{\circ}$ C.

$^1\text{H}$  NMR (400 MHz,  $\text{CDCl}_3$ , ppm)  $\delta$  9.83 (d,  $J$  = 8.2 Hz, 1H), 9.16 (d,  $J$  = 2.9 Hz, 1H), 8.83 (d,  $J$  = 6.3 Hz, 2H), 8.27 (d,  $J$  = 9.3 Hz, 1H), 8.11 (d,  $J$  = 9.3 Hz, 1H), 7.93 (d,  $J$  = 7.7 Hz, 2H), 7.76 (q, 4.5 Hz, 1H), 7.66-7.52 (m, 6H);  $^{13}\text{C}$  NMR (100 MHz,  $\text{CDCl}_3$ , ppm)  $\delta$  167.1, 160.7, 152.5, 151.4, 150.3, 137.9, 137.4, 134.0, 130.8, 130.3, 130.0, 128.7, 128.6, 128.6, 128.3, 127.0, 126.3, 122.2, 119.0; HRMS ( $m/z$ ): calcd for  $\text{C}_{23}\text{H}_{16}\text{N}_3$   $[\text{M}+\text{H}]^+$  334.1339, found 334.1340.

#### 2,4-Diphenylquinazolin-6-amine (3ua)

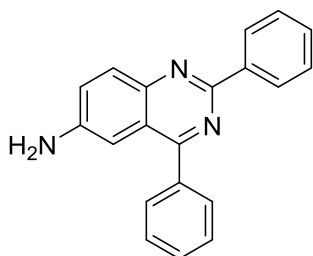

The reaction was conducted with benzene-1,4-diamine (21.6 mg, 0.2 mmol), benzaldehyde (61.2  $\mu$ L, 0.6 mmol) and ammonium iodide (34.8 mg, 0.24 mmol). The residue was purified by column chromatography on silica gel (petroleum ether/ethyl acetate = 5:1) to give **3ua** as yellow solid; yield: 36.2 mg (61%), mp 159-162  $^{\circ}$ C.

$^1\text{H}$  NMR (400 MHz,  $\text{DMSO}-d_6$ , ppm)  $\delta$  8.49 (d,  $J$  = 7.6 Hz, 2H), 7.86-7.81 (m, 3H), 7.62 (d,  $J$  = 5.8 Hz, 3H), 7.53-7.46 (m, 3H), 7.41 (d,  $J$  = 9.0 Hz, 1H), 7.02 (s, 1H), 5.97 (s, 2H);  $^{13}\text{C}$  NMR (100 MHz,  $\text{CDCl}_3$ , ppm)  $\delta$  165.6, 157.4, 146.6, 145.2, 138.5, 138.1, 130.2, 129.8, 129.7, 129.5, 128.4, 128.3, 128.1, 125.3, 122.9, 106.1; HRMS ( $m/z$ ): calcd for  $\text{C}_{20}\text{H}_{16}\text{N}_3$   $[\text{M}+\text{H}]^+$  298.1339, found 298.1340.

#### 4-(2,4-Diphenylquinazolin-6-yl)aniline (3va)

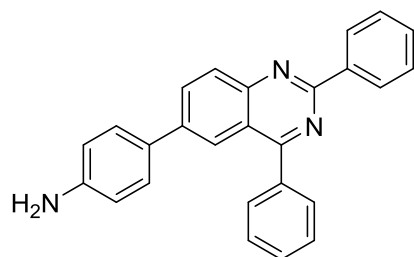

The reaction was conducted with benzidine (36,8 mg, 0.2 mmol), benzaldehyde (61.2  $\mu$ L, 0.6 mmol) and ammonium iodide (34.8 mg, 0.24 mmol). The residue was purified by column chromatography on silica gel (petroleum ether/ethyl acetate = 5:1) to give **3ua** as yellow solid; yield: 31.8 mg (43%), mp 202-204  $^{\circ}$ C.

$^1\text{H}$  NMR (400 MHz, DMSO- $d_6$ , ppm)  $\delta$  8.60 (d,  $J$  = 7.9 Hz, 2H), 8.27 (d,  $J$  = 8.8 Hz, 1H), 8.13 (d,  $J$  = 8.8 Hz, 1H), 8.09 (s, 1H), 7.95 (d,  $J$  = 7.6 Hz, 2H), 7.68 (d,  $J$  = 4.8 Hz, 3H), 7.57 (d,  $J$  = 6.7 Hz, 3H), 7.43 (d,  $J$  = 8.5 Hz, 2H), 6.68 (d,  $J$  = 8.5 Hz, 2H), 5.42 (s, 2H);  $^{13}\text{C}$  NMR (100 MHz,  $\text{CDCl}_3$ , ppm)  $\delta$  168.0, 159.6, 150.8, 146.4, 139.8, 138.2, 137.8, 132.8, 130.3, 130.1, 130.0, 129.9, 129.8, 129.3, 128.5, 128.5, 128.2, 122.8, 121.9, 115.4; HRMS ( $m/z$ ): calcd for  $\text{C}_{26}\text{H}_{20}\text{N}_3$  [ $\text{M}+\text{H}$ ] $^+$  374.1652, found 374.1653.

#### 2,4-Di-*p*-tolylquinazoline (**3ab**, CAS: 1446786-00-0)<sup>[6]</sup>

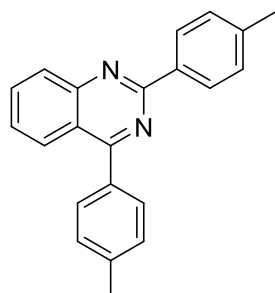

The reaction was conducted with aniline (18.2  $\mu$ L, 0.2 mmol), 4-methylbenzaldehyde (71.0  $\mu$ L, 0.6 mmol) and ammonium iodide (34.8 mg, 0.24 mmol). The residue was purified by column chromatography on silica gel (petroleum ether/ethyl acetate = 100:1) to give **3ab** as white solid; yield: 45.1 mg (73%), mp 132-134  $^{\circ}$ C.

$^1\text{H}$  NMR (400 MHz,  $\text{CDCl}_3$ , ppm)  $\delta$  8.59 (d,  $J$  = 8.0 Hz, 2H), 8.14 (d,  $J$  = 8.9 Hz, 2H), 7.87 (t,  $J$  = 8.2 Hz, 1H), 7.80 (d,  $J$  = 8.0 Hz, 2H), 7.52 (t,  $J$  = 7.6 Hz, 1H), 7.41 (d,  $J$  = 7.9 Hz, 2H), 7.33 (d,  $J$  = 8.1 Hz, 2H), 2.50 (s, 3H), 2.44 (s, 3H);  $^{13}\text{C}$  NMR (100 MHz,  $\text{CDCl}_3$ , ppm)  $\delta$  168.3, 158.9, 150.8, 138.5, 138.0, 137.3, 133.2, 130.3, 130.1, 129.6, 128.6, 128.4, 128.3, 126.3, 124.6, 121.5, 17.50.

#### 2,4-Bis(4-methoxyphenyl)quinazoline (**3ac**, CAS: 1446785-99-4)<sup>[5]</sup>

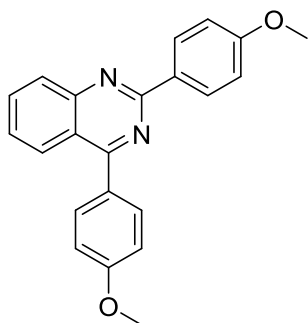

The reaction was conducted with aniline (18.2  $\mu\text{L}$ , 0.2 mmol), 4-methoxybenzaldehyde (72.9  $\mu\text{L}$ , 0.6 mmol) and ammonium iodide (34.8 mg, 0.24 mmol). The residue was purified by column chromatography on silica gel (petroleum ether/ethyl acetate = 20:1) to give **3ac** as white solid; yield: 27.3 mg (40%), mp 134-137  $^{\circ}\text{C}$ .

$^1\text{H}$  NMR (400 MHz,  $\text{CDCl}_3$ , ppm)  $\delta$  8.66 (d,  $J$  = 8.8 Hz, 2H), 8.12 (q, 8.4 Hz, 2H), 7.90-7.83 (m, 3H), 7.51 (t,  $J$  = 8.0 Hz, 1H), 7.12 (d,  $J$  = 8.7 Hz, 2H), 7.04 (d,  $J$  = 8.9 Hz, 2H), 3.93 (s, 3H), 3.90 (s, 3H);  $^{13}\text{C}$  NMR (100 MHz,  $\text{CDCl}_3$ , ppm)  $\delta$  167.5, 161.6, 161.1, 159.8, 152.0, 133.2, 131.8, 130.9, 130.2, 130.2, 128.8, 127.0, 126.3, 121.2, 113.9, 113.7, 55.4, 55.3.

#### 2,4-Bis(4-(*tert*-butyl)phenyl)quinazoline (**3ad**)

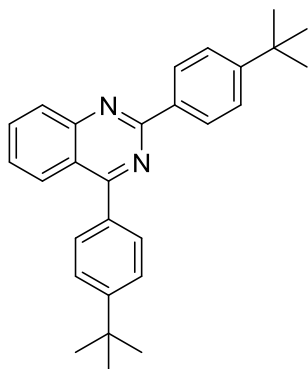

The reaction was conducted with aniline (18.2  $\mu\text{L}$ , 0.2 mmol), 4-(*tert*-butyl)benzaldehyde (100.2  $\mu\text{L}$ , 0.6 mmol) and ammonium iodide (34.8 mg, 0.24 mmol). The residue was purified by column chromatography on silica gel (petroleum ether/ethyl acetate = 50:1) to give **3ad** as yellow solid; yield: 56.9 mg (72%), mp 124-126  $^{\circ}\text{C}$ .

$^1\text{H}$  NMR (400 MHz,  $\text{CDCl}_3$ , ppm)  $\delta$  8.62 (d,  $J$  = 8.3 Hz, 2H), 8.19 (d,  $J$  = 8.3 Hz, 2H), 7.90-7.84 (m, 3H), 7.62 (d,  $J$  = 8.3 Hz, 2H), 7.55 (d,  $J$  = 8.4 Hz, 3H), 1.43 (s, 9H), 1.39 (s, 9H);  $^{13}\text{C}$  NMR (100 MHz,  $\text{CDCl}_3$ , ppm)  $\delta$  168.1, 160.3, 153.7, 153.1, 151.9, 135.5, 134.9, 133.3, 130.0, 129.0, 128.4, 127.1, 126.6, 125.5, 125.4, 121.5, 34.8, 31.3; HRMS ( $m/z$ ): calcd for  $\text{C}_{28}\text{H}_{31}\text{N}_2$   $[\text{M}+\text{H}]^+$  395.2482, found 395.2484.

#### 2,4-Bis(4-chlorophenyl)quinazoline (**3ae**, CAS: 1520087-48-2)<sup>[7]</sup>

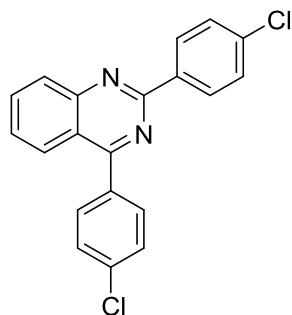

The reaction was conducted with aniline (18.2  $\mu$ L, 0.2 mmol), 4-chlorobenzaldehyde (84.3 mg, 0.6 mmol) and ammonium iodide (34.8 mg, 0.24 mmol). The residue was purified by column chromatography on silica gel (petroleum ether/ethyl acetate = 30:1) to give **3ae** as white solid; yield: 63.6 mg (90%), mp 194-196  $^{\circ}$ C.

$^1\text{H}$  NMR (400 MHz,  $\text{CDCl}_3$ , ppm)  $\delta$  8.63 (d,  $J$  = 8.5 Hz, 2H), 8.15 (d,  $J$  = 8.5 Hz, 1H), 8.08 (d,  $J$  = 8.4 Hz, 1H), 7.91 (t,  $J$  = 8.2 Hz, 1H), 7.83 (d,  $J$  = 8.4 Hz, 2H), 7.59 (d,  $J$  = 8.3 Hz, 3H), 7.49 (d,  $J$  = 8.5 Hz, 2H);  $^{13}\text{C}$  NMR (100 MHz,  $\text{CDCl}_3$ , ppm)  $\delta$  167.1, 159.1, 151.9, 136.8, 136.4, 136.4, 135.9, 133.8, 131.4, 129.9, 129.2, 128.8, 128.7, 127.4, 126.5, 121.4.

#### 2,4-Bis(4-bromophenyl)quinazoline (**3af**, CAS: 1446785-97-2)<sup>[5]</sup>

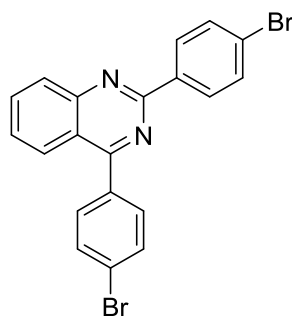

The reaction was conducted with aniline (18.2  $\mu$ L, 0.2 mmol), 4-bromobenzaldehyde (111.0 mg, 0.6 mmol) and ammonium iodide (34.8 mg, 0.24 mmol). The residue was purified by column chromatography on silica gel (petroleum ether/ethyl acetate = 30:1) to give **3af** as white solid; yield: 71.8 mg (82%), mp 218-221  $^{\circ}$ C.

$^1\text{H}$  NMR (400 MHz,  $\text{CDCl}_3$ , ppm)  $\delta$  8.56 (d,  $J$  = 8.6 Hz, 2H), 8.16 (d,  $J$  = 8.4 Hz, 1H), 8.07 (d,  $J$  = 8.4 Hz, 1H), 7.91 (t,  $J$  = 8.3 Hz, 1H), 7.75 (s, 4H), 7.65 (d,  $J$  = 8.6 Hz, 2H), 7.58 (t,  $J$  = 8.1 Hz, 1H);  $^{13}\text{C}$  NMR (100 MHz,  $\text{CDCl}_3$ , ppm)  $\delta$  167.2, 159.2, 151.9, 136.9, 136.3, 133.8, 131.8, 131.7, 130.2, 129.2, 127.4, 126.5, 125.4, 124.7, 121.4.

#### 2,4-Di-*m*-tolylquinazoline (**3ag**)

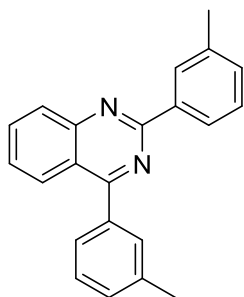

The reaction was conducted with aniline (18.2  $\mu\text{L}$ , 0.2 mmol), 3-methylbenzaldehyde (70.7  $\mu\text{L}$ , 0.6 mmol) and ammonium iodide (34.8 mg, 0.24 mmol). The residue was purified by column chromatography on silica gel (petroleum ether/ethyl acetate = 50:1) to give **3ag** as white solid; yield: 40.4 mg (65%), mp 88-91  $^{\circ}\text{C}$ .

$^1\text{H}$  NMR (400 MHz,  $\text{CDCl}_3$ , ppm)  $\delta$  8.50 (s, 2H), 8.17 (d,  $J = 8.4$  Hz, 1H), 8.12 (d,  $J = 8.4$  Hz, 1H), 7.89 (t,  $J = 8.0$  Hz, 1H), 7.70 (s, 1H), 7.66 (d,  $J = 7.9$  Hz, 1H), 7.55 (t,  $J = 7.6$  Hz, 1H), 7.49 (t,  $J = 7.6$  Hz, 1H), 7.42 (q,  $J = 7.0$  Hz, 2H), 7.32 (d,  $J = 7.4$  Hz, 1H), 2.51 (s, 3H), 2.49 (s, 3H);  $^{13}\text{C}$  NMR (100 MHz,  $\text{CDCl}_3$ , ppm)  $\delta$  168.5, 160.3, 151.8, 138.3, 138.1, 138.0, 137.5, 133.4, 131.2, 130.6, 130.6, 129.1, 129.0, 128.4, 128.3, 127.3, 127.0, 126.8, 125.9, 121.7, 21.5, 21.5; HRMS (m/z): calcd for  $\text{C}_{22}\text{H}_{19}\text{N}_2$   $[\text{M}+\text{H}]^+$  311.1543, found 311.1545.

#### 2,4-Bis(3-methoxyphenyl)quinazoline (**3ah**)<sup>[6]</sup>

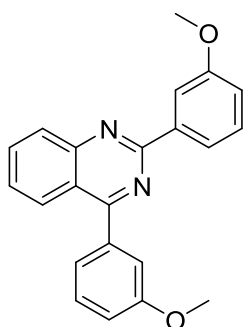

The reaction was conducted with aniline (18.2  $\mu\text{L}$ , 0.2 mmol), 3-methoxybenzaldehyde (73.0  $\mu\text{L}$ , 0.6 mmol) and ammonium iodide (34.8 mg, 0.24 mmol). The residue was purified by column chromatography on silica gel (petroleum ether/ethyl acetate = 30:1) to give **3ah** as yellow solid; yield: 52.6 mg (77%), mp 96-98  $^{\circ}\text{C}$ .

$^1\text{H}$  NMR (400 MHz,  $\text{CDCl}_3$ , ppm)  $\delta$  8.31 (d,  $J = 7.8$  Hz, 1H), 8.27 (s, 1H), 8.20 (d,  $J = 8.3$  Hz, 1H), 8.16 (d,  $J = 8.4$  Hz, 1H), 7.90 (t,  $J = 7.7$  Hz, 1H), 7.56 (t,  $J = 7.6$  Hz, 1H), 7.51 (t,  $J = 8.0$  Hz, 1H), 7.47-7.41 (m, 3H), 7.14 (d,  $J = 9.0$  Hz, 1H), 7.07 (d,  $J = 8.2$  Hz, 1H), 3.96 (s, 3H), 3.92 (s, 3H);  $^{13}\text{C}$  NMR (100 MHz,  $\text{CDCl}_3$ , ppm)  $\delta$  168.0, 159.9, 159.9, 159.6, 151.8, 139.5, 138.8, 133.5, 129.5, 129.5, 129.0, 127.0, 126.9, 122.6, 121.6, 121.3, 116.8, 115.5, 115.5, 113.3, 55.4, 55.4.

#### 2,4-Bis(3-fluorophenyl)quinazoline (**3ai**)

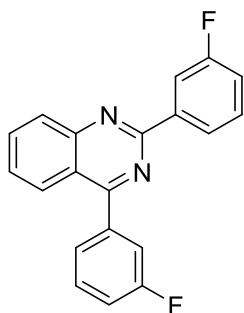

The reaction was conducted with aniline (18.2  $\mu$ L, 0.2 mmol), 3-fluorobenzaldehyde (63.0  $\mu$ L, 0.6 mmol) and ammonium iodide (34.8 mg, 0.24 mmol). The residue was purified by column chromatography on silica gel (petroleum ether/ethyl acetate = 50:1) to give **3ai** as yellow solid; yield: 53.0 mg (83%), mp 158-160  $^{\circ}$ C.

$^1\text{H}$  NMR (400 MHz,  $\text{CDCl}_3$ , ppm)  $\delta$  8.50 (d,  $J = 7.8$  Hz, 1H), 8.40 (d,  $J = 10.3$  Hz, 1H), 8.22 (d,  $J = 8.4$  Hz, 1H), 8.13 (d,  $J = 8.3$  Hz, 1H), 7.94 (t,  $J = 7.7$  Hz, 1H), 7.66 (d,  $J = 7.7$  Hz, 1H), 7.64-7.55 (m, 3H), 7.51 (q,  $J = 6.7$  Hz, 1H), 7.31 (t,  $J = 8.4$  Hz, 1H), 7.21 (t,  $J = 8.2$  Hz, 1H);  $^{13}\text{C}$  NMR (100 MHz,  $\text{CDCl}_3$ )  $\delta$  166.9 (d,  $J = 2.4$  Hz), 163.2 (d,  $J = 243.2$  Hz), 162.7 (d,  $J = 245.7$  Hz), 158.9 (d,  $J = 3.3$  Hz), 151.9, 140.3 (d,  $J = 7.8$  Hz), 139.5 (d,  $J = 7.4$  Hz), 133.9, 130.1 (d,  $J = 8.1$  Hz), 130.0 (d,  $J = 7.9$  Hz), 129.3, 127.6, 126.6, 125.9 (d,  $J = 3.1$  Hz), 124.2 (d,  $J = 2.9$  Hz), 121.5, 117.4 (d,  $J = 21.4$  Hz), 117.1 (d,  $J = 22.6$  Hz), 117.0 (d,  $J = 21.0$  Hz), 115.4 (d,  $J = 23.0$  Hz); HRMS ( $m/z$ ): calcd for  $\text{C}_{20}\text{H}_{13}\text{F}_2\text{N}_2$   $[\text{M}+\text{H}]^+$  319.1041, found 319.1044.

#### 2,4-Bis(3-chlorophenyl)quinazoline (3aj)

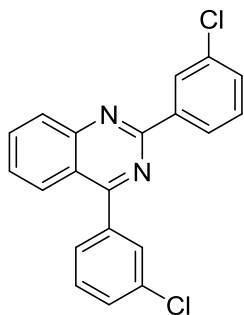

The reaction was conducted with aniline (18.2  $\mu$ L, 0.2 mmol), 3-chlorobenzaldehyde (68.0  $\mu$ L, 0.6 mmol) and ammonium iodide (34.8 mg, 0.24 mmol). The residue was purified by column chromatography on silica gel (petroleum ether/ethyl acetate = 50:1) to give **3aj** as white solid; yield: 61.6 mg (88%), mp 143-145  $^{\circ}$ C.

$^1\text{H}$  NMR (400 MHz,  $\text{CDCl}_3$ , ppm)  $\delta$  8.69 (s, 1H), 8.59 (d,  $J = 6.5$  Hz, 1H), 8.20 (d,  $J = 8.4$  Hz, 1H), 8.09 (d,  $J = 8.4$  Hz, 1H), 7.94 (t,  $J = 8.3$  Hz, 1H), 7.87 (s, 1H), 7.75 (d,  $J = 7.3$  Hz, 1H), 7.64-7.53 (m, 3H), 7.48-7.47 (m, 2H);  $^{13}\text{C}$  NMR (100 MHz,  $\text{CDCl}_3$ , ppm)  $\delta$  166.8, 158.7, 151.8, 139.7, 139.0, 134.6, 133.9, 130.5, 130.0, 130.0, 129.8, 129.7, 129.2, 128.6, 128.3, 127.6, 126.7, 126.5, 121.5; HRMS ( $m/z$ ): calcd for  $\text{C}_{20}\text{H}_{13}\text{Cl}_2\text{N}_2$   $[\text{M}+\text{H}]^+$  351.0450, found 351.0455.



### 2,4-Bis(3-bromophenyl)quinazoline (3ak)<sup>[6]</sup>

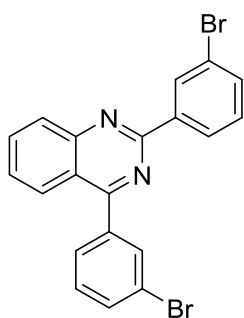

The reaction was conducted with aniline (18.2  $\mu$ L, 0.2 mmol), 3-bromobenzaldehyde (70.0  $\mu$ L, 0.6 mmol) and ammonium iodide (34.8 mg, 0.24 mmol). The residue was purified by column chromatography on silica gel (petroleum ether/ethyl acetate = 50:1) to give **3ak** as white solid; yield: 81.3 mg (92%), mp 142-145  $^{\circ}$ C.

$^1\text{H}$  NMR (400 MHz,  $\text{CDCl}_3$ , ppm)  $\delta$  8.84 (s, 1H), 8.64 (d,  $J = 7.9$  Hz, 1H), 8.20 (d,  $J = 8.4$  Hz, 1H), 8.08 (d,  $J = 8.1$  Hz, 1H), 8.02 (s, 1H), 7.94 (t,  $J = 7.7$  Hz, 1H), 7.79 (d,  $J = 7.7$  Hz, 1H), 7.74 (d,  $J = 8.1$  Hz, 1H), 7.62 (q,  $J = 7.8$  Hz, 2H), 7.49 (t,  $J = 7.9$  Hz, 1H), 7.41 (t,  $J = 7.9$  Hz, 1H);  $^{13}\text{C}$  NMR (100 MHz,  $\text{CDCl}_3$ , ppm)  $\delta$  166.7, 158.6, 151.8, 139.9, 139.2, 133.9, 133.4, 132.9, 132.8, 131.5, 130.0, 129.2, 128.7, 127.6, 127.1, 126.5, 122.8, 122.7, 121.5.

### 2,4-Di-*o*-tolylquinazoline (3al, CAS: 1446786-01-1)<sup>[5]</sup>

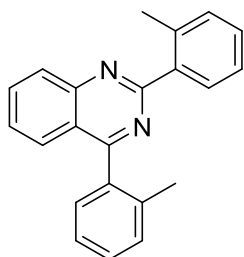

The reaction was conducted with aniline (18.2  $\mu$ L, 0.2 mmol), 2-methylbenzaldehyde (69.4  $\mu$ L, 0.6 mmol) and ammonium iodide (34.8 mg, 0.24 mmol). The residue was purified by column chromatography on silica gel (petroleum ether/ethyl acetate = 30:1) to give **3al** as white solid; yield: 31.9 mg (51%), mp 108-111  $^{\circ}$ C.

$^1\text{H}$  NMR (400 MHz,  $\text{CDCl}_3$ , ppm)  $\delta$  8.18 (d,  $J = 8.5$  Hz, 1H), 7.91 (t,  $J = 8.4$  Hz, 2H), 7.71 (d,  $J = 8.3$  Hz, 1H), 7.54 (t,  $J = 7.6$  Hz, 1H), 7.46-7.30 (m, 7H), 2.63 (s, 3H), 2.22 (s, 3H);  $^{13}\text{C}$  NMR (100 MHz,  $\text{CDCl}_3$ , ppm)  $\delta$  169.6, 163.4, 150.9, 138.8, 137.2, 136.7, 136.1, 133.8, 131.1, 130.6, 130.5, 129.4, 129.1, 128.8, 127.3, 127.0, 125.9, 125.6, 121.9, 21.1, 19.9.

### 2,4-Bis(2-fluorophenyl)quinazoline (3am)

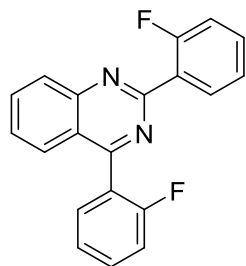

The reaction was conducted with aniline (18.2  $\mu$ L, 0.2 mmol), 2-fluorobenzaldehyde (63.0  $\mu$ L, 0.6 mmol) and ammonium iodide (34.8 mg, 0.24 mmol). The residue was purified by column chromatography on silica gel (petroleum ether/ethyl acetate = 30:1) to give **3am** as white solid; yield: 42.3 mg (66%), mp 97-99  $^{\circ}$ C.

$^1\text{H}$  NMR (400 MHz,  $\text{CDCl}_3$ , ppm)  $\delta$  8.24-8.16 (m, 2H), 7.94 (t,  $J$  = 7.7 Hz, 1H), 7.87 (dd,  $J$  = 8.3, 3.6 Hz, 1H), 7.71 (t,  $J$  = 7.3 Hz, 1H), 7.62 (t,  $J$  = 8.0 Hz, 1H), 7.59-7.52 (m, 1H), 7.50-7.42 (m, 1H), 7.38 (t,  $J$  = 7.5 Hz, 1H), 7.33-7.20 (m, 3H);  $^{13}\text{C}$  NMR (100 MHz,  $\text{CDCl}_3$ , ppm)  $\delta$  164.6, 161.2 (d,  $J$  = 253.1 Hz), 159.8 (d,  $J$  = 248.4 Hz), 159.2 (d,  $J$  = 4.3 Hz), 151.1, 134.0, 132.2 (d,  $J$  = 1.9 Hz), 131.8 (d,  $J$  = 3.0 Hz), 131.7 (d,  $J$  = 8.1 Hz), 131.5 (d,  $J$  = 8.5 Hz), 128.9, 127.8, 127.1 (d,  $J$  = 10.1 Hz), 126.7 (d,  $J$  = 3.2 Hz), 125.2 (d,  $J$  = 15.0 Hz), 124.6 (d,  $J$  = 3.5 Hz), 124.1 (d,  $J$  = 3.8 Hz), 122.0, 116.8 (d,  $J$  = 22.0 Hz), 116.0 (d,  $J$  = 21.4 Hz); HRMS ( $m/z$ ): calcd for  $\text{C}_{20}\text{H}_{13}\text{F}_2\text{N}_2$   $[\text{M}+\text{H}]^+$  319.1041, found 319.1044.

#### 2,4-Bis(2-chlorophenyl)quinazoline (3an)

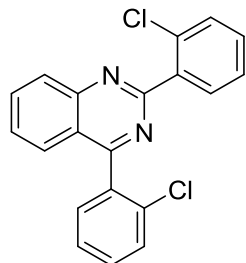

The reaction was conducted with aniline (18.2  $\mu$ L, 0.2 mmol), 2-chlorobenzaldehyde (67.5  $\mu$ L, 0.6 mmol) and ammonium iodide (34.8 mg, 0.24 mmol). The residue was purified by column chromatography on silica gel (petroleum ether/ethyl acetate = 20:1) to give **3an** as yellow liquid; yield: 56.7 mg (80%).

$^1\text{H}$  NMR (400 MHz,  $\text{CDCl}_3$ , ppm)  $\delta$  8.22 (d,  $J$  = 8.5 Hz, 1H), 7.96 (t,  $J$  = 7.7 Hz, 1H), 7.88 (dd,  $J$  = 7.0, 2.3 Hz, 1H), 7.73 (d,  $J$  = 7.8 Hz, 1H), 7.64-7.35 (m, 8H);  $^{13}\text{C}$  NMR (100 MHz,  $\text{CDCl}_3$ , ppm)  $\delta$  167.0, 161.3, 150.8, 138.2, 135.9, 134.1, 132.9, 132.8, 131.7, 131.0, 130.6, 130.4, 130.2, 129.8, 128.9, 127.9, 126.9, 126.8, 126.8, 121.9; HRMS ( $m/z$ ): calcd for  $\text{C}_{20}\text{H}_{13}\text{Cl}_2\text{N}_2$   $[\text{M}+\text{H}]^+$  351.0450, found 351.0455.

#### 2,4-Bis(2-bromophenyl)quinazoline (3ao)<sup>[6]</sup>

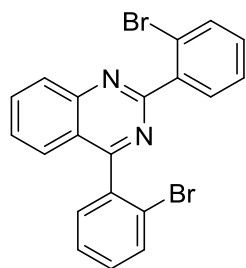

The reaction was conducted with aniline (18.2  $\mu$ L, 0.2 mmol), 2-bromobenzaldehyde (70.0  $\mu$ L, 0.6 mmol) and ammonium iodide (34.8 mg, 0.24 mmol). The residue was purified by column chromatography on silica gel (petroleum ether/ethyl acetate = 20:1) to give **3ao** as yellow liquid; yield: 50.1 mg (58%).

$^1\text{H}$  NMR (400 MHz,  $\text{CDCl}_3$ , ppm)  $\delta$  8.24 (d,  $J$  = 8.5 Hz, 1H), 7.97 (t,  $J$  = 8.3 Hz, 1H), 7.86 (d,  $J$  = 7.6 Hz, 1H), 7.74 (dd,  $J$  = 15.4, 8.1 Hz, 3H), 7.63 (t,  $J$  = 7.6 Hz, 1H), 7.56-7.39 (m, 4H), 7.31 (t,  $J$  = 8.5 Hz, 1H);  $^{13}\text{C}$  NMR (100 MHz,  $\text{CDCl}_3$ , ppm)  $\delta$  168.2, 162.1, 150.8, 140.1, 137.9, 134.2, 133.5, 133.0, 131.6, 130.9, 130.7, 130.3, 128.9, 128.0, 127.5, 127.4, 126.9, 122.0, 121.8.

#### 2,4-Bis(3,4-dimethylphenyl)quinazoline (3ap)

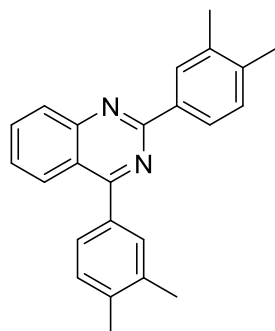

The reaction was conducted with aniline (18.2  $\mu$ L, 0.2 mmol), 3,4-dimethylbenzaldehyde (79.6  $\mu$ L, 0.6 mmol) and ammonium iodide (34.8 mg, 0.24 mmol). The residue was purified by column chromatography on silica gel (petroleum ether/ethyl acetate = 100:1) to give **3ap** as yellow solid; yield: 36.9 mg (55%), mp 158-160  $^{\circ}\text{C}$ .

$^1\text{H}$  NMR (400 MHz,  $\text{CDCl}_3$ , ppm)  $\delta$  8.46 (s, 1H), 8.43 (d,  $J$  = 7.9 Hz, 1H), 8.14 (d,  $J$  = 8.5 Hz, 2H), 7.86 (t,  $J$  = 8.1 Hz, 1H), 7.68 (s, 1H), 7.61 (d,  $J$  = 7.7 Hz, 1H), 7.52 (t,  $J$  = 7.5 Hz, 1H), 7.36 (d,  $J$  = 7.7 Hz, 1H), 7.29 (d,  $J$  = 7.9 Hz, 1H), 2.42 (s, 3H), 2.40 (d,  $J$  = 3.4 Hz, 6H), 2.35 (s, 3H);  $^{13}\text{C}$  NMR (100 MHz,  $\text{CDCl}_3$ , ppm)  $\delta$  168.3, 160.4, 151.9, 139.3, 138.7, 136.9, 136.6, 135.9, 135.3, 133.3, 131.2, 129.8, 129.7, 129.6, 128.9, 127.7, 127.2, 126.5, 126.3, 121.6, 19.9, 19.9, 19.9, 19.8; HRMS ( $m/z$ ): calcd for  $\text{C}_{24}\text{H}_{23}\text{N}_2^+$   $[\text{M}+\text{H}]^+$  339.1856, found 339.1854.

#### 2,4-Bis(2,3-dichlorophenyl)quinazoline (3aq)

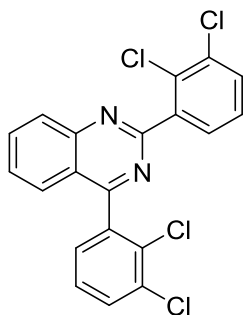

The reaction was conducted with aniline (18.2  $\mu$ L, 0.2 mmol), 2,3-dichlorobenzaldehyde (105.0 mg, 0.6 mmol) and ammonium iodide (34.8 mg, 0.24 mmol). The residue was purified by column chromatography on silica gel (petroleum ether/ethyl acetate = 20:1) to give **3aq** as yellow solid; yield: 64.1 mg (76%), mp 188-191  $^{\circ}$ C.

$^1$ H NMR (400 MHz,  $\text{CDCl}_3$ , ppm)  $\delta$  8.22 (d,  $J$  = 8.5 Hz, 1H), 7.99 (t,  $J$  = 7.6 Hz, 1H), 7.75-7.63 (m, 4H), 7.58 (d,  $J$  = 6.5 Hz, 1H), 7.45-7.38 (m, 2H), 7.36 (t,  $J$  = 7.9 Hz, 1H);  $^{13}$ C NMR (100 MHz,  $\text{CDCl}_3$ , ppm)  $\delta$  166.7, 161.0, 150.9, 140.3, 137.9, 134.6, 134.0, 133.9, 131.5, 131.5, 131.4, 131.1, 129.7, 129.1, 129.0, 128.5, 127.7, 127.4, 126.6, 121.8; HRMS ( $m/z$ ): calcd for  $\text{C}_{20}\text{H}_{13}\text{Cl}_4\text{N}_2$   $[\text{M}+\text{H}]^+$  420.9827, found 420.9823.

#### 2,4-Bis(2,4-dichlorophenyl)quinazoline (3ar)

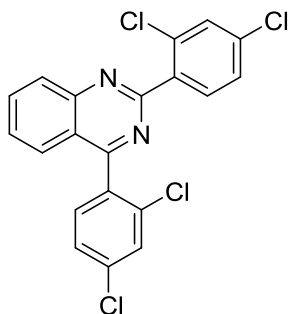

The reaction was conducted with aniline (18.2  $\mu$ L, 0.2 mmol), 2,4-dichlorobenzaldehyde (105.0 mg, 0.6 mmol) and ammonium iodide (34.8 mg, 0.24 mmol). The residue was purified by column chromatography on silica gel (petroleum ether/ethyl acetate = 100:1) to give **3ar** as yellow liquid; yield: 75.1 mg (89%).

$^1$ H NMR (400 MHz,  $\text{CDCl}_3$ , ppm)  $\delta$  8.20 (d,  $J$  = 8.5 Hz, 1H), 7.97 (t,  $J$  = 7.6 Hz, 1H), 7.87 (d,  $J$  = 8.3 Hz, 1H), 7.71 (d,  $J$  = 7.7 Hz, 1H), 7.67-7.59 (m, 2H), 7.56 (s, 1H), 7.50-7.45 (m, 2H), 7.40 (d,  $J$  = 8.3 Hz, 1H);  $^{13}$ C NMR (100 MHz,  $\text{CDCl}_3$ , ppm)  $\delta$  166.1, 160.3, 150.9, 136.4, 136.2, 135.7, 134.4, 134.4, 133.9, 133.8, 132.8, 131.9, 130.3, 129.8, 129.0, 128.3, 127.4, 127.2, 126.6, 121.8; HRMS ( $m/z$ ): calcd for  $\text{C}_{20}\text{H}_{13}\text{Cl}_4\text{N}_2$   $[\text{M}+\text{H}]^+$  420.9827, found 420.9823.

#### 2,4-Bis(2-chloro-4-fluorophenyl)quinazoline (3as)

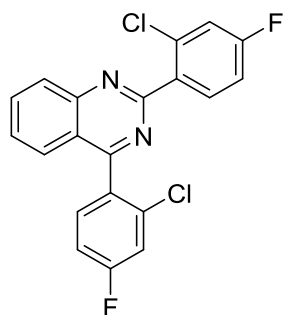

The reaction was conducted with aniline (18.2  $\mu\text{L}$ , 0.2 mmol), 2-chloro-4-fluorobenzaldehyde (95.1 mg, 0.6 mmol) and ammonium iodide (34.8 mg, 0.24 mmol). The residue was purified by column chromatography on silica gel (petroleum ether/ethyl acetate = 50:1) to give **3as** as yellow solid; yield: 55.1 mg (72%), mp 82-85  $^{\circ}\text{C}$ .

$^1\text{H}$  NMR (400 MHz,  $\text{CDCl}_3$ , ppm)  $\delta$  8.25 (d,  $J = 8.5$  Hz, 1H), 7.99 (t,  $J = 7.7$  Hz, 1H), 7.93 (t,  $J = 7.7$  Hz, 1H), 7.72 (d,  $J = 8.4$  Hz, 1H), 7.65 (t,  $J = 8.1$  Hz, 1H), 7.54 (t,  $J = 8.0$  Hz, 1H), 7.34 (d,  $J = 8.5$  Hz, 1H), 7.29 (d,  $J = 8.6$  Hz, 1H), 7.21 (t,  $J = 8.9$  Hz, 1H), 7.15 (t,  $J = 8.3$  Hz, 1H);  $^{13}\text{C}$  NMR (100 MHz,  $\text{CDCl}_3$ , ppm)  $\delta$  166.3, 163.1 (d,  $J = 251.2$  Hz), 162.8 (d,  $J = 250.6$  Hz), 160.4, 150.9, 134.4, 134.4, 134.2 (d,  $J = 10.5$  Hz), 134.0 (d,  $J = 10.4$  Hz), 133.3 (d,  $J = 9.1$  Hz), 132.4 (d,  $J = 9.0$  Hz), 132.2 (d,  $J = 3.7$  Hz), 129.0, 128.12, 126.6, 121.9, 117.8 (d,  $J = 24.6$  Hz), 117.4 (d,  $J = 24.7$  Hz), 114.5 (d,  $J = 21.4$  Hz), 114.2 (d,  $J = 21.2$  Hz); HRMS ( $m/z$ ): calcd for  $\text{C}_{20}\text{H}_{11}\text{Cl}_2\text{F}_2\text{N}_2$   $[\text{M}+\text{H}]^+$  387.0262, found 387.0263.

#### 2,4-Bis(2-bromo-5-chlorophenyl)quinazoline (3at)

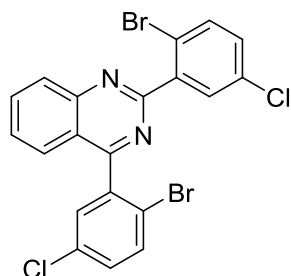

The reaction was conducted with aniline (18.2  $\mu\text{L}$ , 0.2 mmol), 2-bromo-5-chlorobenzaldehyde (131.7 mg, 0.6 mmol) and ammonium iodide (34.8 mg, 0.24 mmol). The residue was purified by column chromatography on silica gel (petroleum ether/ethyl acetate = 100:1) to give **3at** as yellow solid; yield: 88.8 mg (87%), mp 133-136  $^{\circ}\text{C}$ .

$^1\text{H}$  NMR (400 MHz,  $\text{CDCl}_3$ , ppm)  $\delta$  8.25 (d,  $J = 8.5$  Hz, 1H), 8.01 (t,  $J = 8.4$  Hz, 1H), 7.85 (s, 1H), 7.72-7.65 (m, 4H), 7.50 (s, 1H), 7.41 (d,  $J = 8.6$  Hz, 1H), 7.31 (d,  $J = 8.6$  Hz, 1H);  $^{13}\text{C}$  NMR (100 MHz,  $\text{CDCl}_3$ , ppm)  $\delta$  167.1, 160.9, 150.8, 141.3, 141.1, 139.2, 134.8, 134.7, 134.2, 133.8, 133.5, 131.6, 130.94, 130.7, 130.4, 129.0, 128.6, 126.6, 121.6, 120.0; HRMS ( $m/z$ ): calcd for  $\text{C}_{20}\text{H}_{11}\text{Br}_2\text{Cl}_2\text{N}_2$   $[\text{M}+\text{H}]^+$  506.8661, found 506.8666.

#### 2,4-Bis(2-bromo-5-methoxyphenyl)quinazoline (3au)

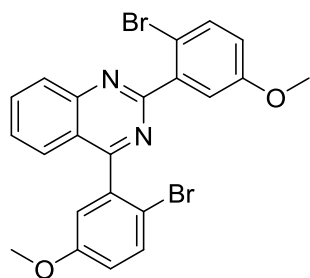

The reaction was conducted with aniline (18.2  $\mu$ L, 0.2 mmol), 2-bromo-5-methoxybenzaldehyde (129.0 mg, 0.6 mmol) and ammonium iodide (34.8 mg, 0.24 mmol). The residue was purified by column chromatography on silica gel (petroleum ether/ethyl acetate = 10:1) to give **3au** as yellow solid; yield: 63.9 mg (64%), mp 151-154  $^{\circ}$ C.

$^1\text{H}$  NMR (400 MHz,  $\text{CDCl}_3$ , ppm)  $\delta$  8.25 (d,  $J$  = 8.5 Hz, 1H), 7.97 (t,  $J$  = 7.1 Hz, 1H), 7.76 (d,  $J$  = 7.7 Hz, 1H), 7.66-7.58 (m, 3H), 7.40 (s, 1H), 7.07 (s, 1H), 6.97 (d,  $J$  = 8.9 Hz, 1H), 6.89 (d,  $J$  = 8.8 Hz, 1H), 3.86 (s, 3H), 3.83 (s, 3H);  $^{13}\text{C}$  NMR (100 MHz,  $\text{CDCl}_3$ , ppm)  $\delta$  168.1, 162.0, 158.8, 150.7, 140.7, 138.6, 134.3, 133.7, 128.9, 128.0, 127.0, 121.7, 117.1, 116.9, 116.6, 116.2, 112.5, 112.3, 55.6, 55.6; HRMS (m/z): calcd for  $\text{C}_{22}\text{H}_{17}\text{Br}_2\text{N}_2\text{O}_2^+$   $[\text{M}+\text{H}]^+$  498.9651, found 498.9659.

#### 2,4-Di(naphthalen-2-yl)quinazoline (**3av**)<sup>[6]</sup>

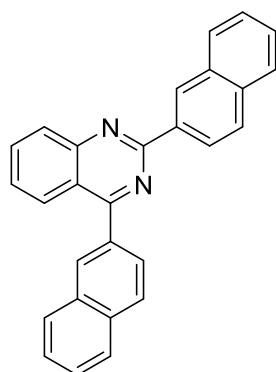

The reaction was conducted with aniline (18.2  $\mu$ L, 0.2 mmol), 2-naphthaldehyde (93.7 mg, 0.6 mmol) and ammonium iodide (34.8 mg, 0.24 mmol). The residue was purified by column chromatography on silica gel (petroleum ether/ethyl acetate = 50:1) to give **3av** as yellow solid; yield: 54.2 mg (71%), mp 187-189  $^{\circ}$ C.

$^1\text{H}$  NMR (400 MHz,  $\text{CDCl}_3$ , ppm)  $\delta$  9.29 (s, 1H), 8.85 (d,  $J$  = 8.8 Hz, 1H), 8.41 (s, 1H), 8.27 (d,  $J$  = 8.4 Hz, 1H), 8.22 (d,  $J$  = 8.3 Hz, 1H), 8.13-7.97 (m, 6H), 7.96-7.90 (m, 2H), 7.66-7.49 (m, 5H);  $^{13}\text{C}$  NMR (100 MHz,  $\text{CDCl}_3$ , ppm)  $\delta$  168.2, 160.1, 152.0, 135.5, 134.9, 134.6, 133.9, 133.5, 133.3, 132.9, 130.3, 129.2, 129.1, 129.0, 128.7, 128.3, 128.1, 127.8, 127.7, 127.2, 127.0, 127.0, 126.9, 126.6, 126.1, 125.6, 121.8.

#### 2-Phenylquinazoline (6 CAS: 25855-20-3)<sup>[8]</sup>

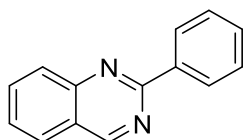

A 10 mL oven-dried reaction vessel was charged with 2-aminobenzaldehyde (24.2 mg, 0.2 mmol) ammonium iodide (34.8 mg, 0.24 mmol). The reaction vessel was purged with oxygen for three times and then was added benzaldehyde (40.8  $\mu$ L, 0.4 mmol), chlorobenzene (0.5 mL) and DMSO (0.1 mL) by syringe. The reaction vessel was stirred at 150  $^{\circ}$ C for 12 h. After cooling to room temperature, the volatiles were removed under reduced pressure. The residue was purified by column chromatography on silica gel (petroleum ether/ethyl acetate = 20:1) to give **6** as yellow solid; yield: 23.1 mg (56 %).

$^1\text{H}$  NMR (400 MHz,  $\text{CDCl}_3$ , ppm)  $\delta$  9.48 (s, 1H), 8.63 (d,  $J$  = 8.2 Hz, 2H), 8.11 (d,  $J$  = 8.4 Hz, 1H), 7.95-7.90 (m, 2H), 7.62 (t,  $J$  = 8.0 Hz, 1H), 7.57-7.48 (m, 3H);  $^{13}\text{C}$  NMR (100 MHz,  $\text{CDCl}_3$ , ppm)  $\delta$  161.0, 160.5, 150.7, 137.9, 134.1, 130.6, 128.6, 128.6, 128.6, 127.3, 127.1, 123.6.

## 5. Reference

1. Z. C. Shen, P. Yang and Y. Tang, *J. Org. Chem.*, 2016, **81**, 309.
2. R. Prakash, B. R. Bora, R. C. Boruah and S. Gogoi, *Org. Lett.*, 2018, **20**, 2297.
3. C. Y. Chen, F. X. He, G. R. Tang, H. Q. Yuan, N. Li, J. M. Wang and R. Faessler, *J. Org. Chem.*, 2018, **83**, 2395.
4. Z. G. Lv, B. N. Wang, Z. Y. Hu, Y. M. Zhou, W. Q. Yu and J. B. Chang, *J. Org. Chem.*, 2016, **81**, 9924.
5. X. Su, C. Chen, Y. Wang, J. J. Chen, Z. B. Lou and M. Li, *Chem. Commun.*, 2013, **49**, 6752.
6. M. Ramanathan and S. T. Liu, *J. Org. Chem.*, 2017, **82**, 8290.
7. S. V. Eswararao, V. Venkataramireddy, M. Srinivasareddy and P. Kumar, *Asian J. Chem.*, 2017, **29**, 1434.
8. X. F. Cheng, H. M. Wang, F. H. Xiao, G. J. Deng, *Green Chem.*, 2016, **18**, 5773.

## 6. $^1\text{H}$ NMR and $^{13}\text{C}$ NMR spectra for all products

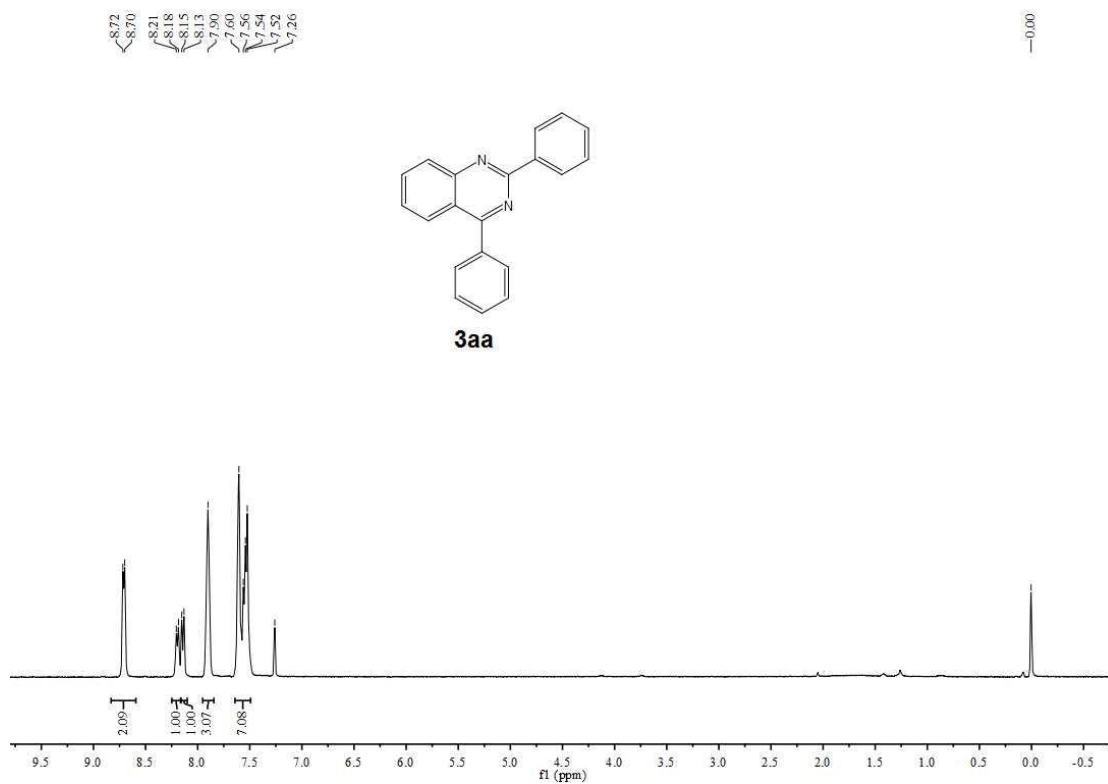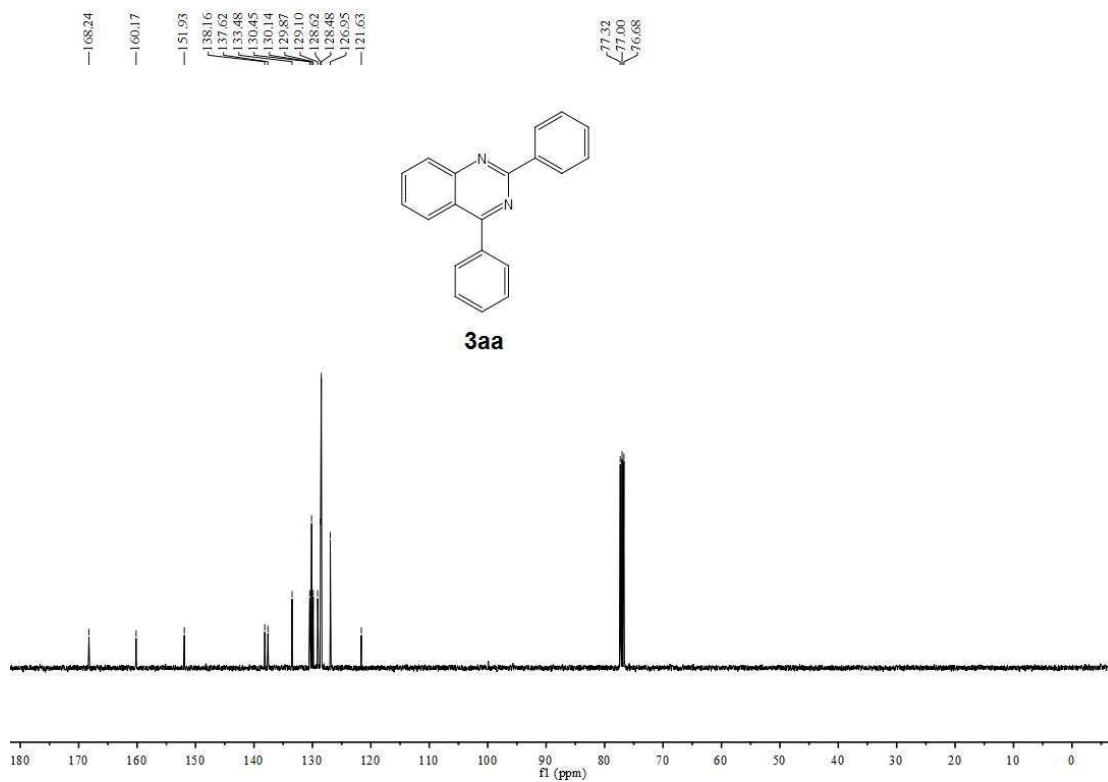



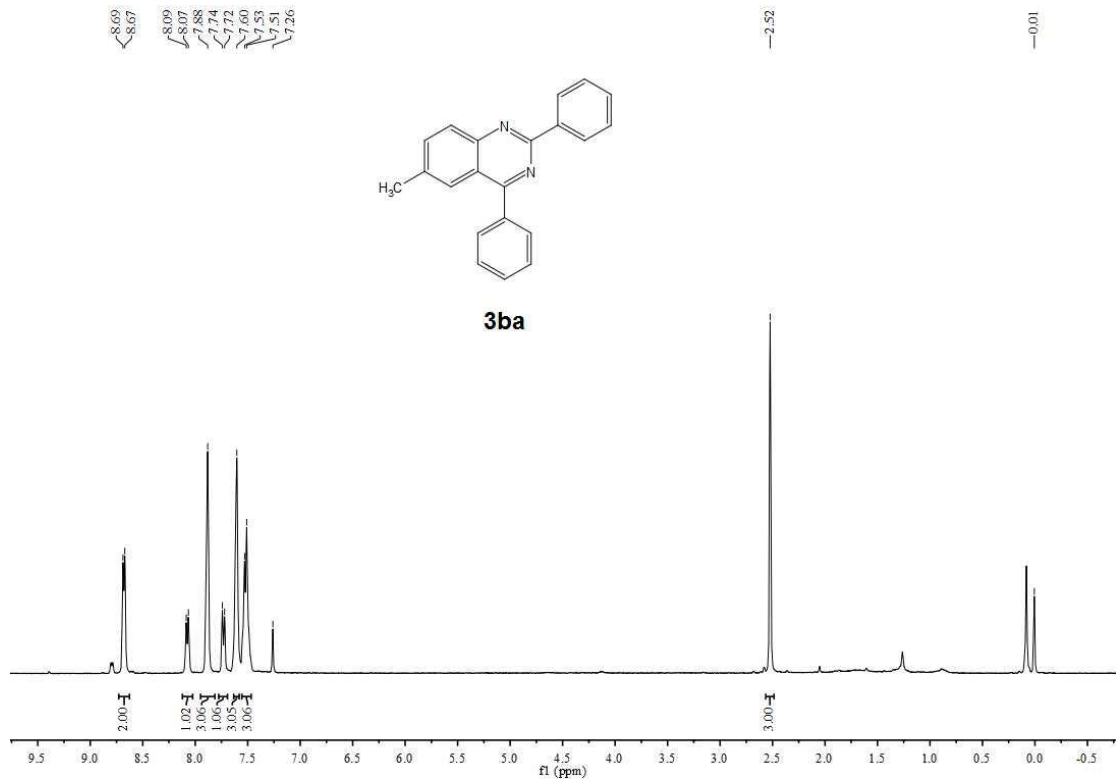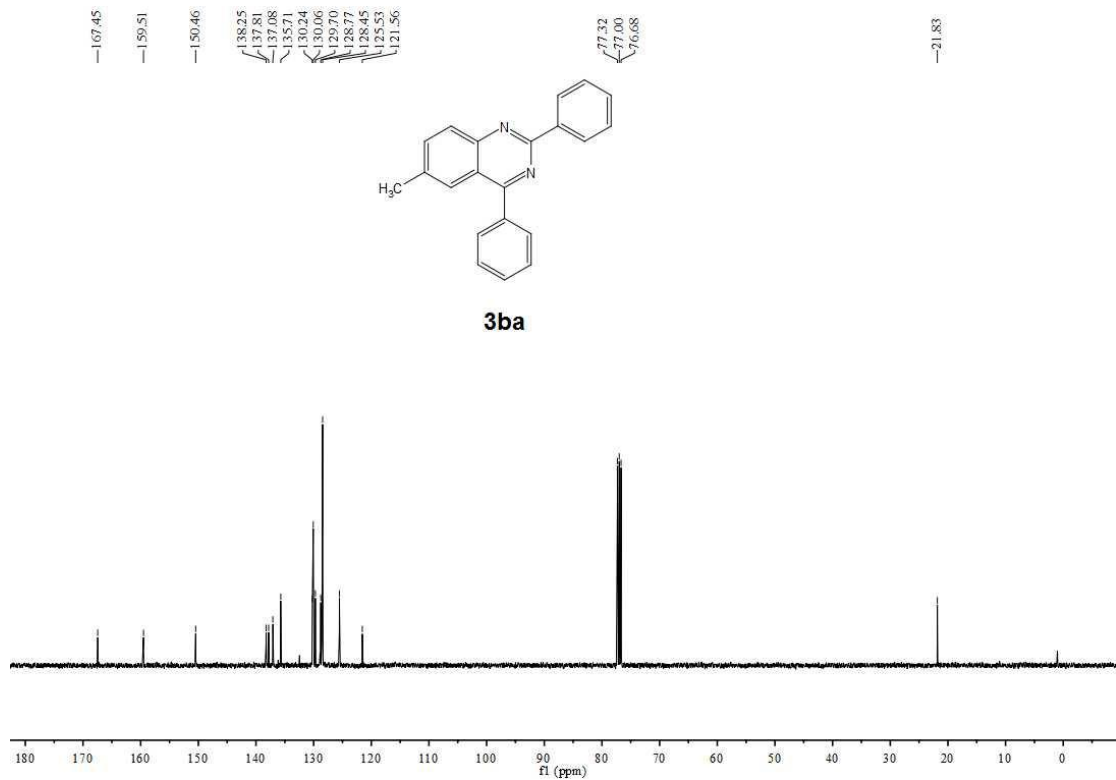

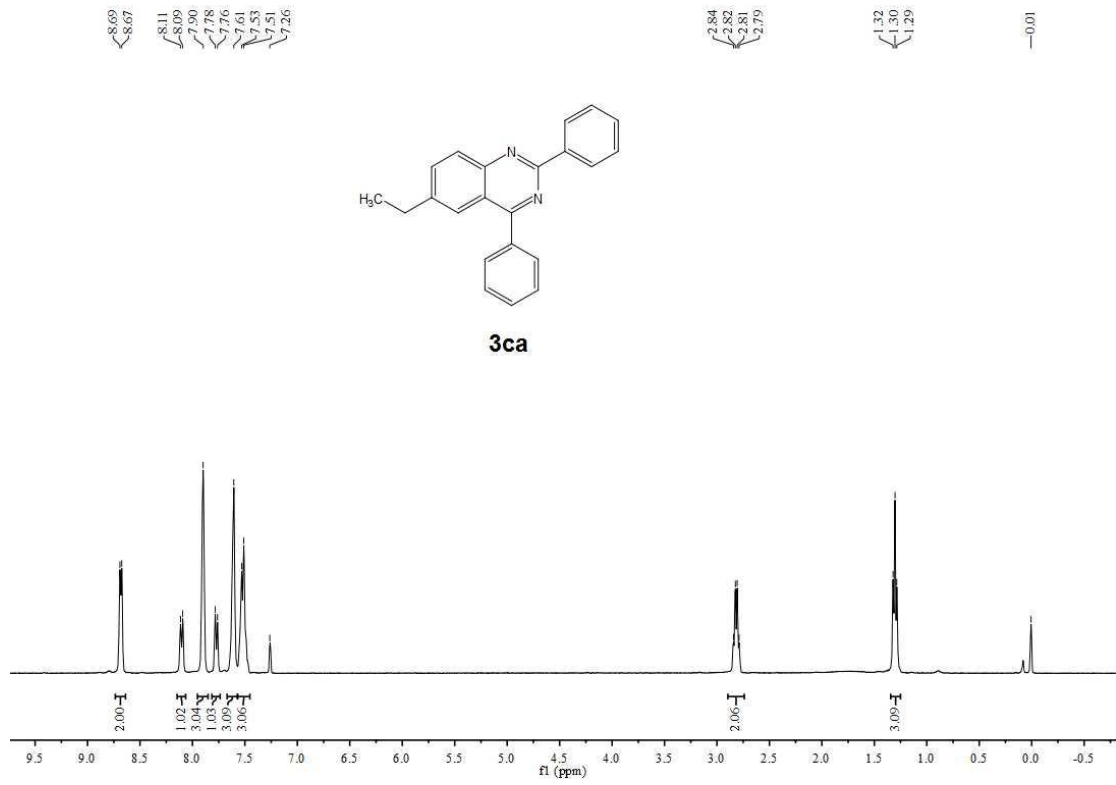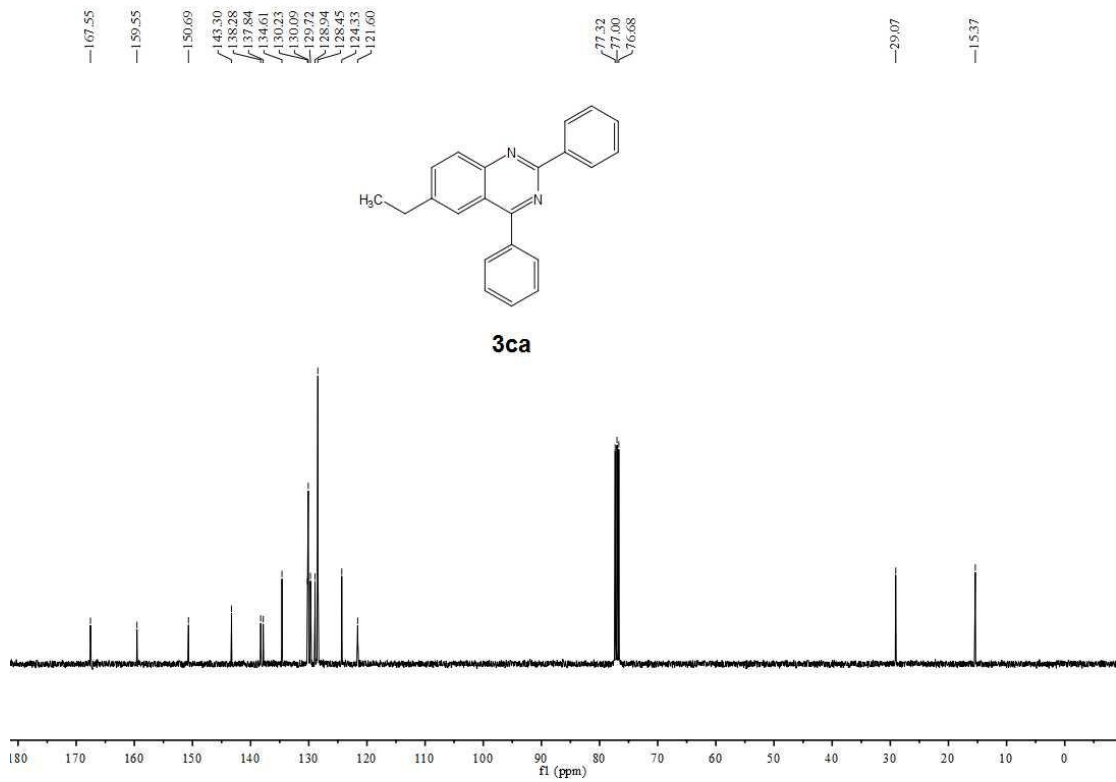

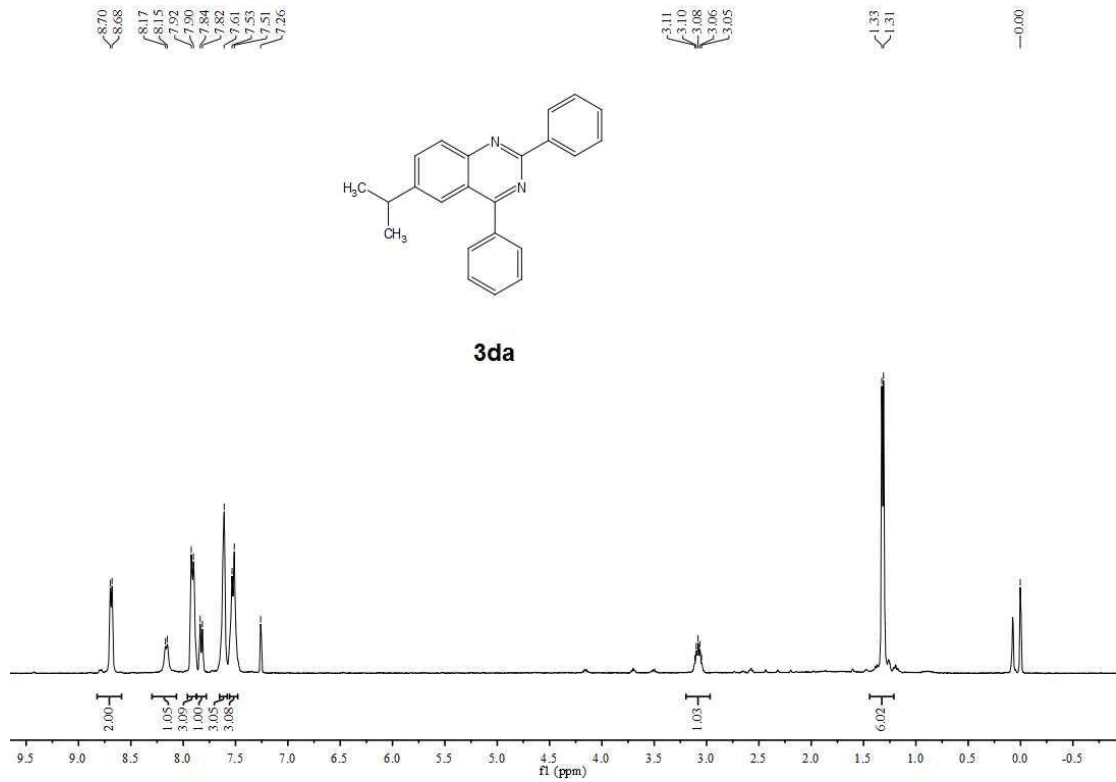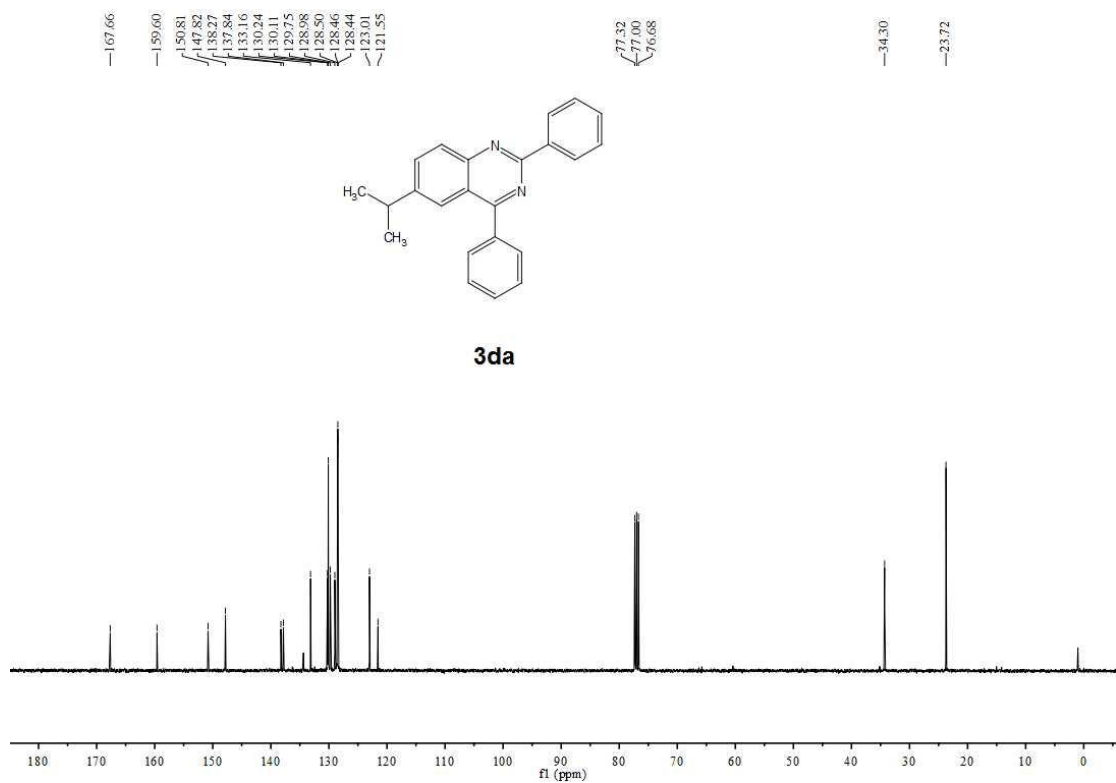

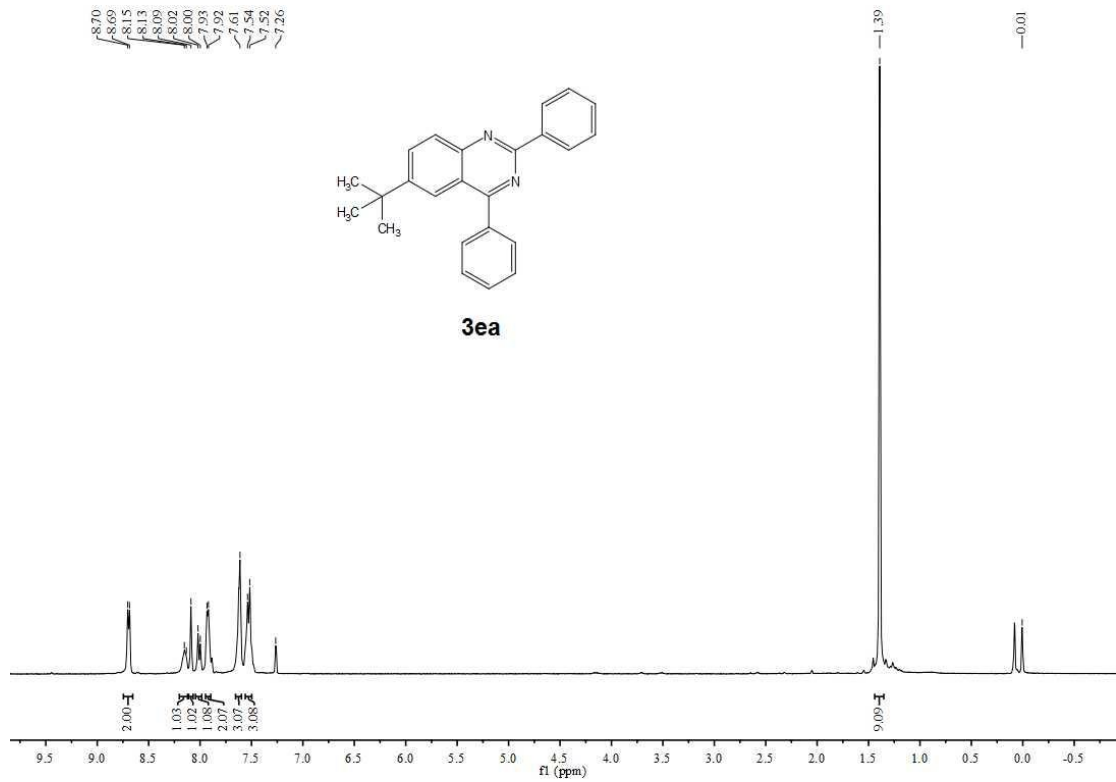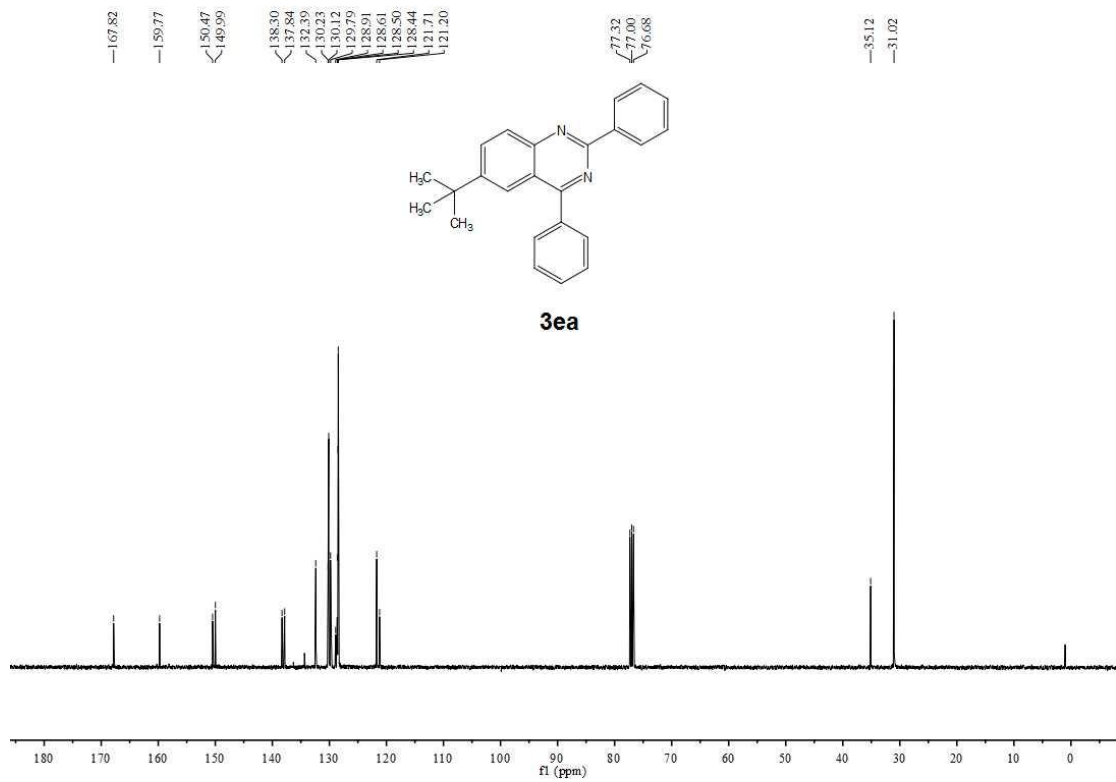

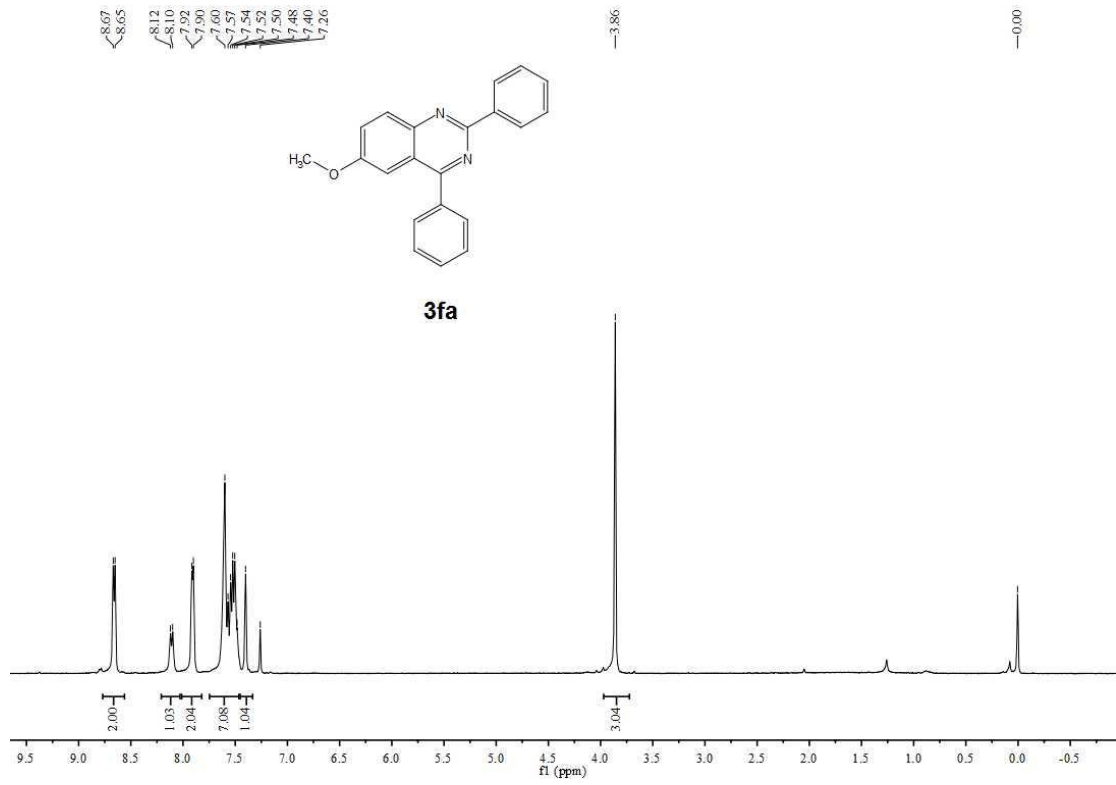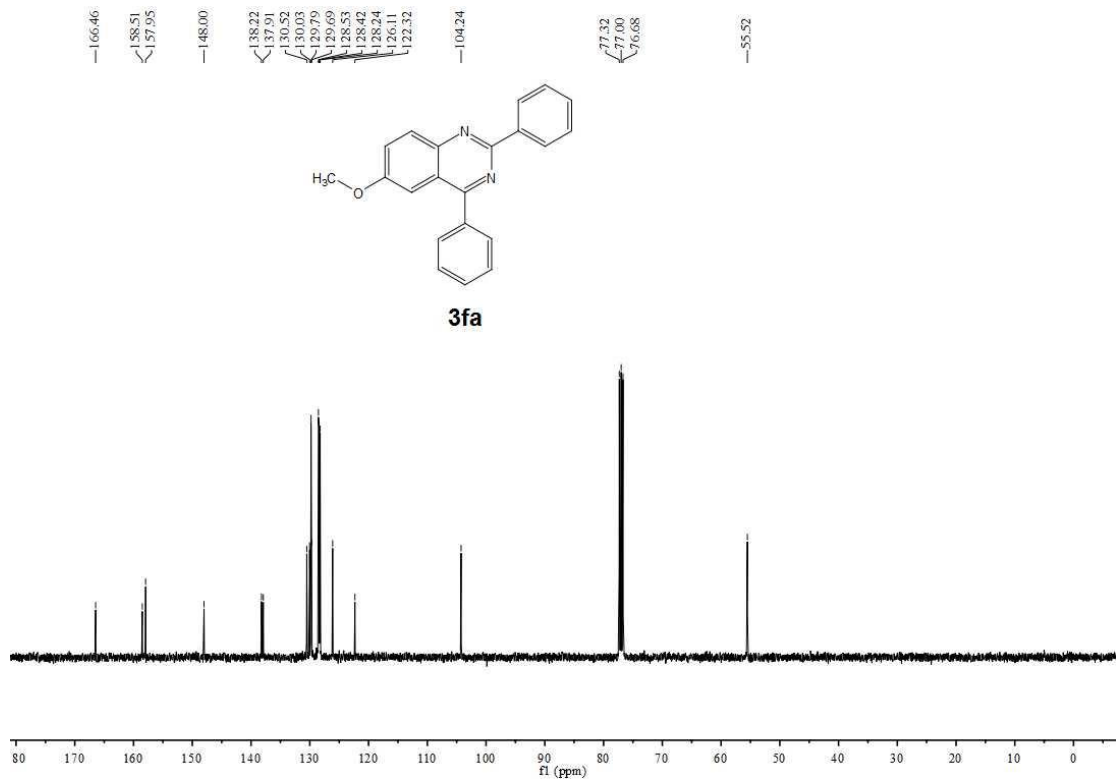

8.73  
8.72  
8.31  
8.27  
8.25  
8.18  
8.15  
7.95  
7.94  
7.66  
7.63  
7.62  
7.55  
7.53  
7.50  
7.49  
7.47  
7.42  
7.41  
7.39  
7.26

-0.01

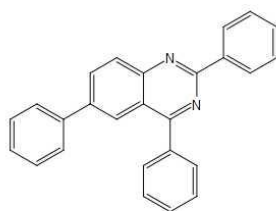

**3ga**

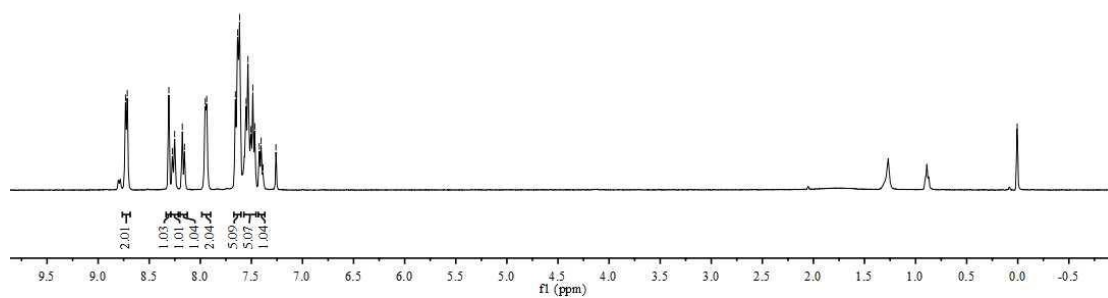

168.33  
160.05  
151.28  
139.91  
138.08  
137.04  
133.66  
130.49  
130.16  
129.04  
129.53  
128.98  
128.62  
128.59  
128.50  
127.89  
127.32  
124.48  
121.80  
77.32  
77.00  
76.08

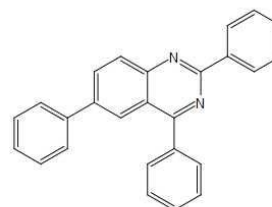

**3ga**

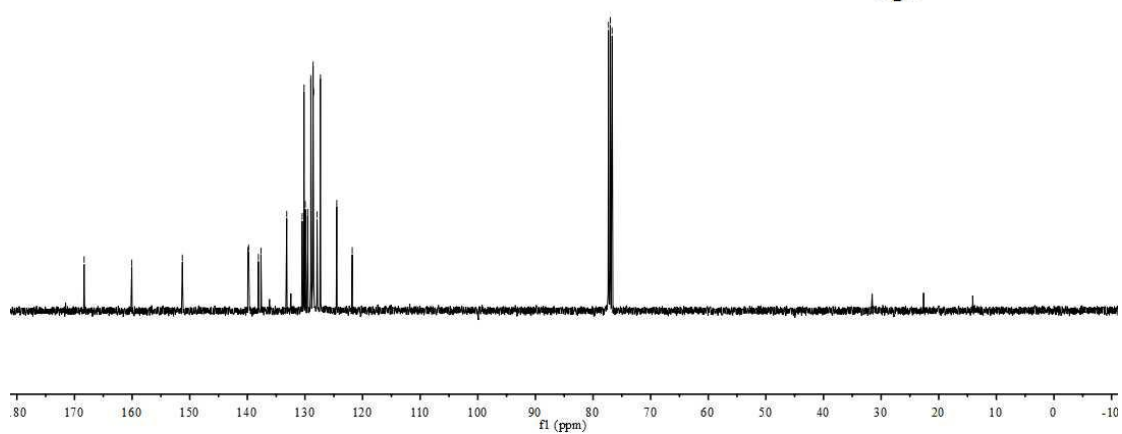

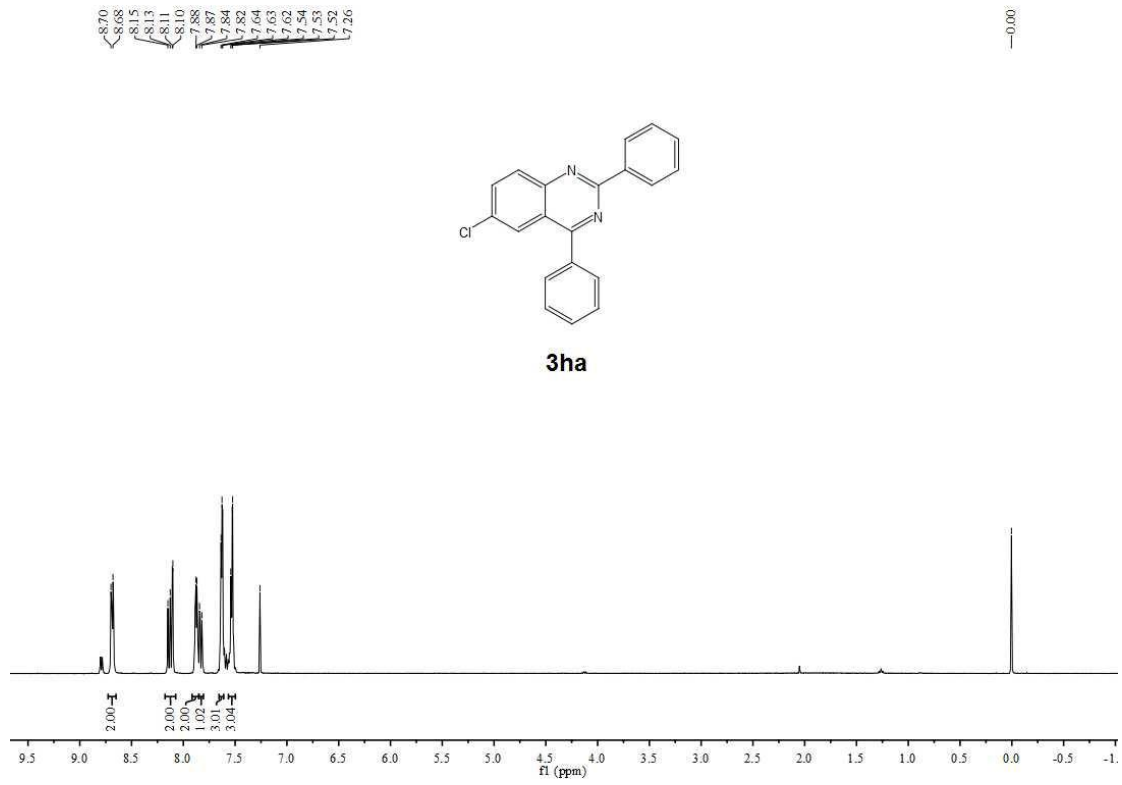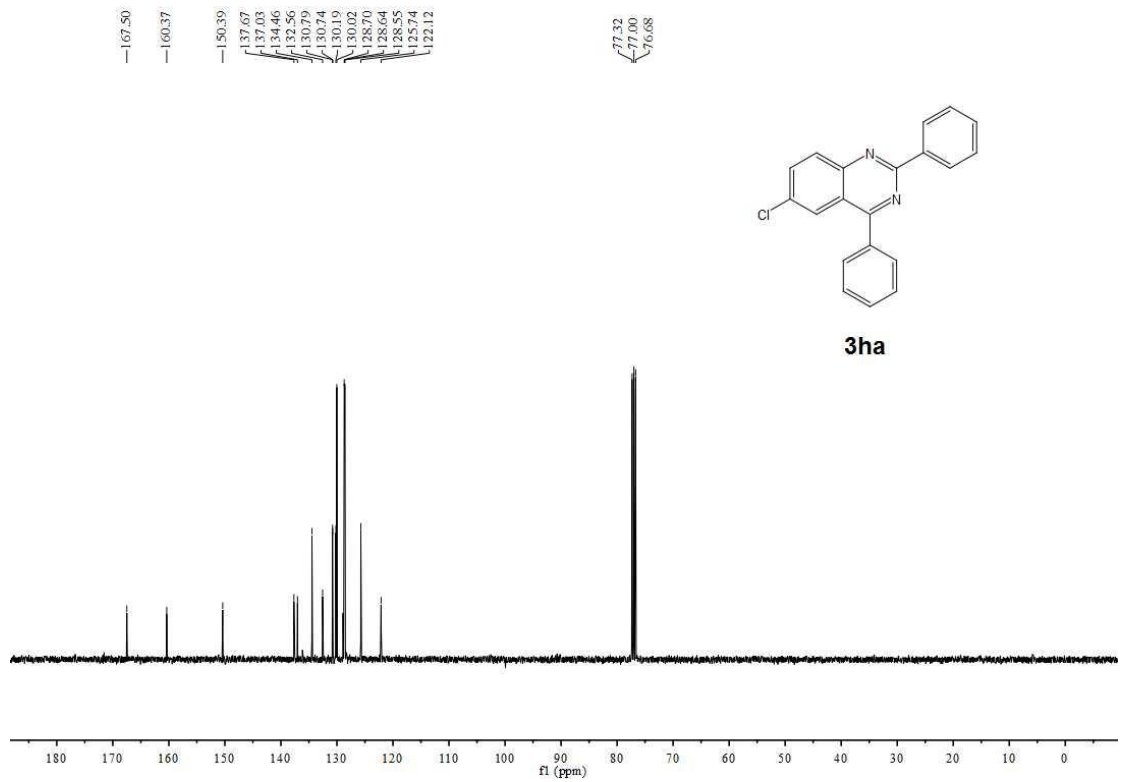

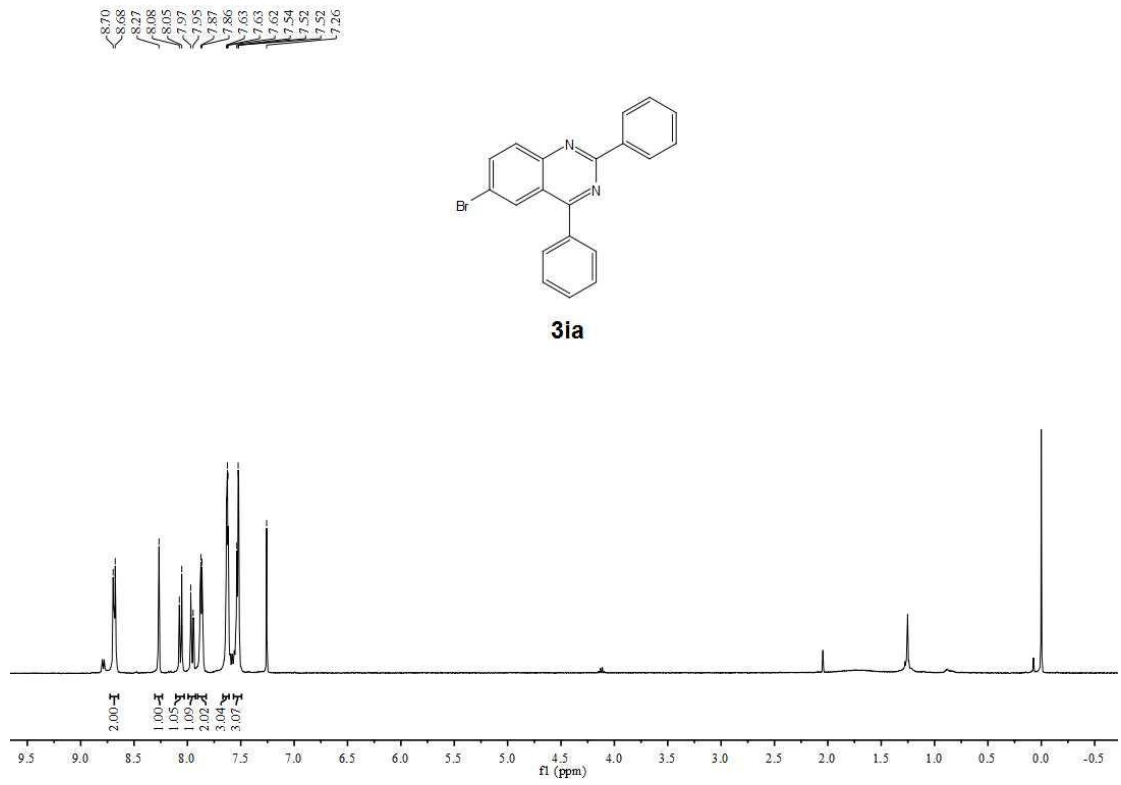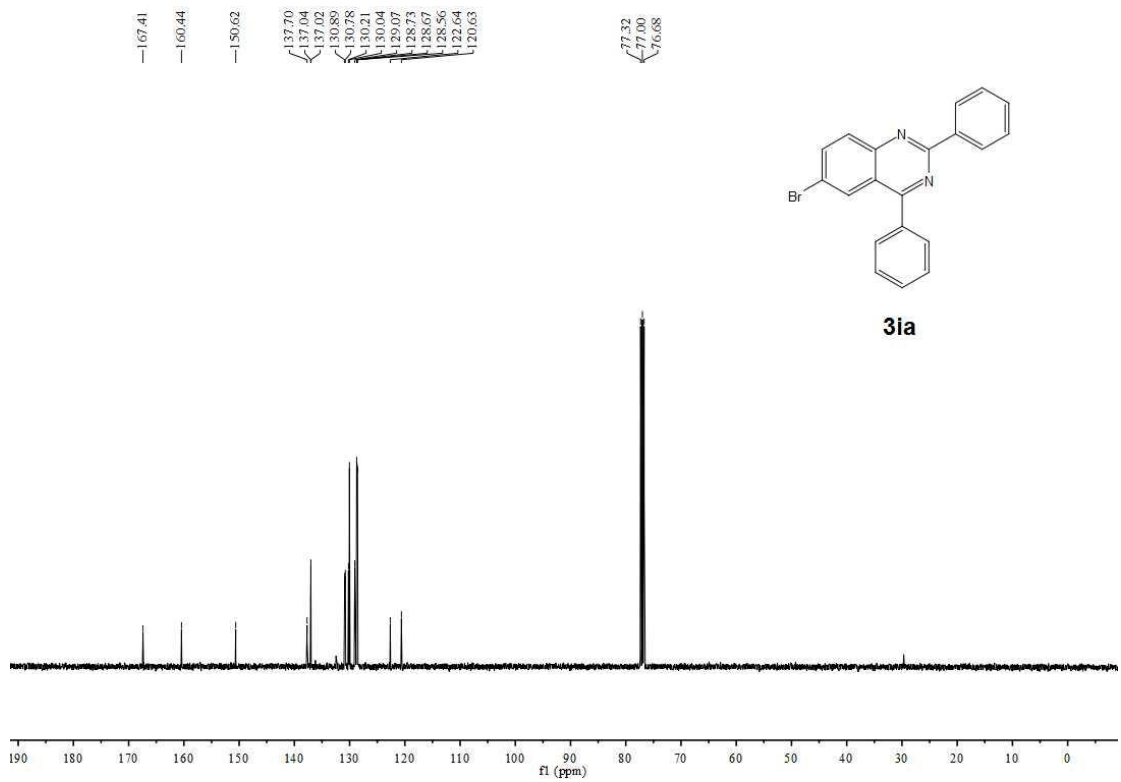



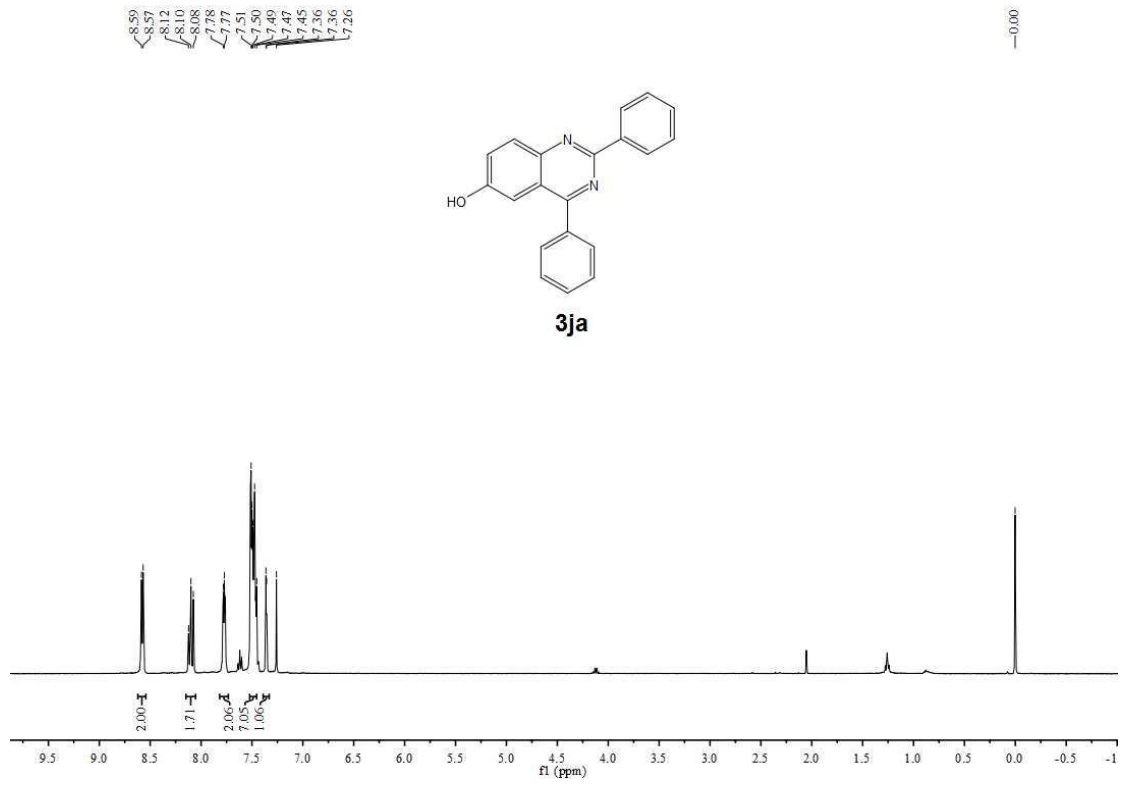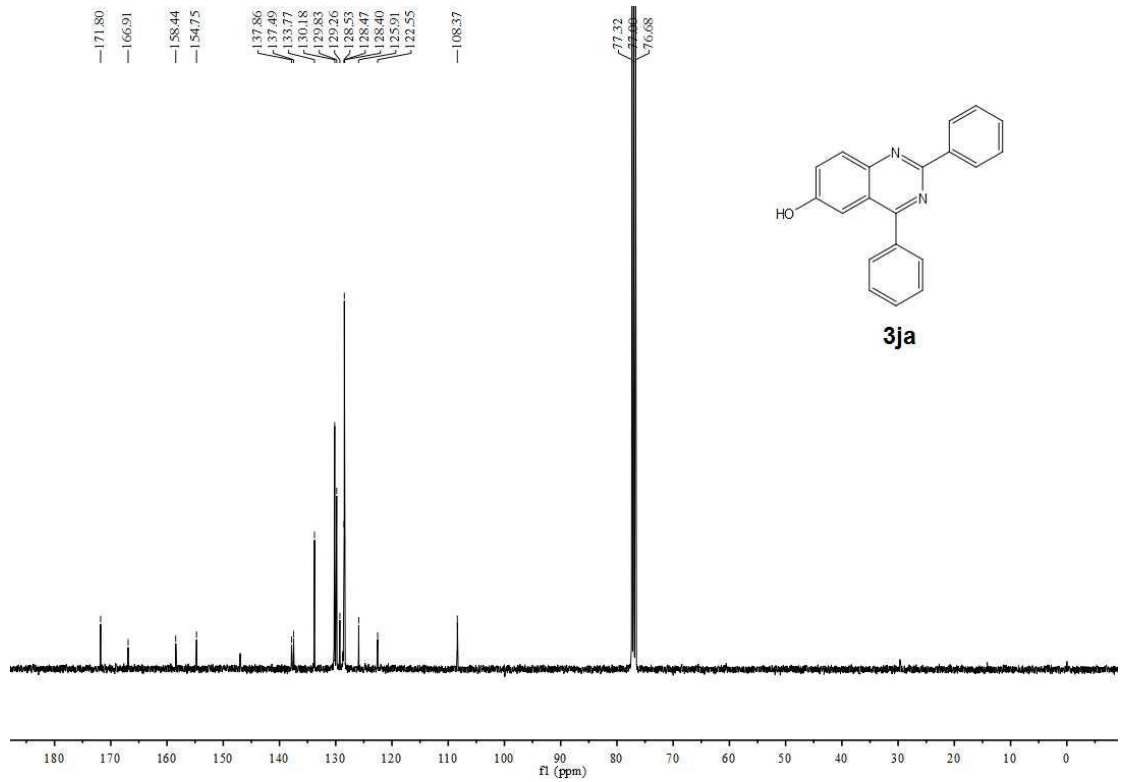

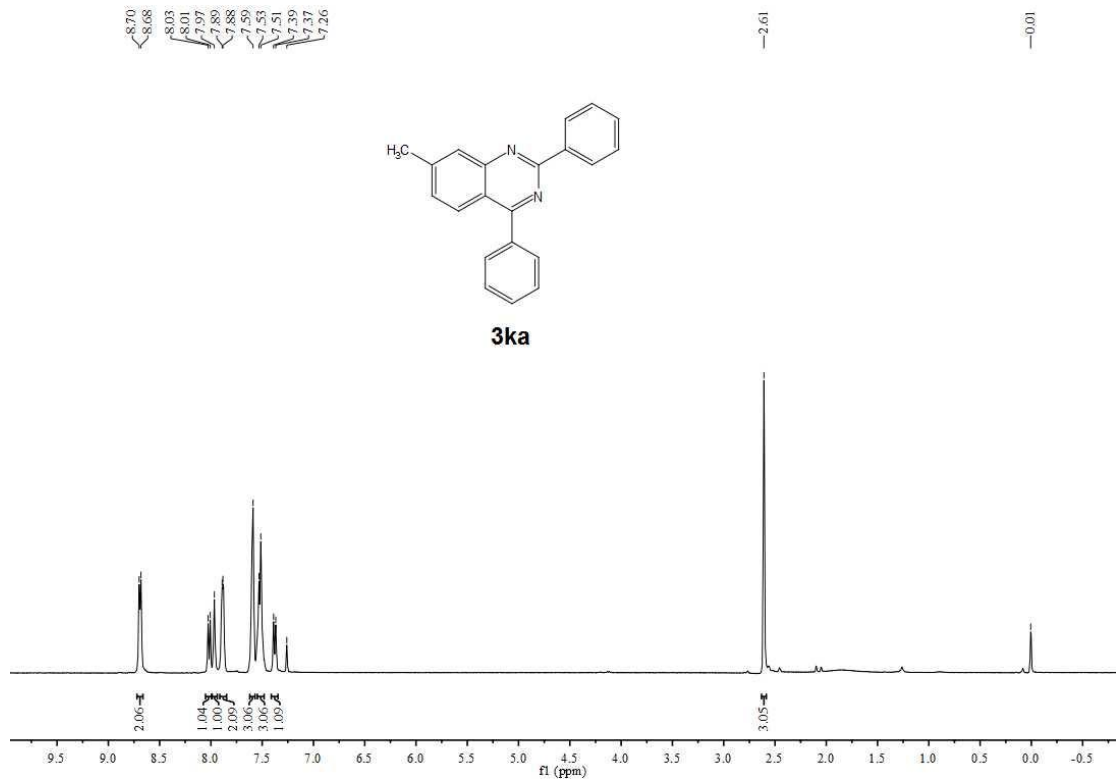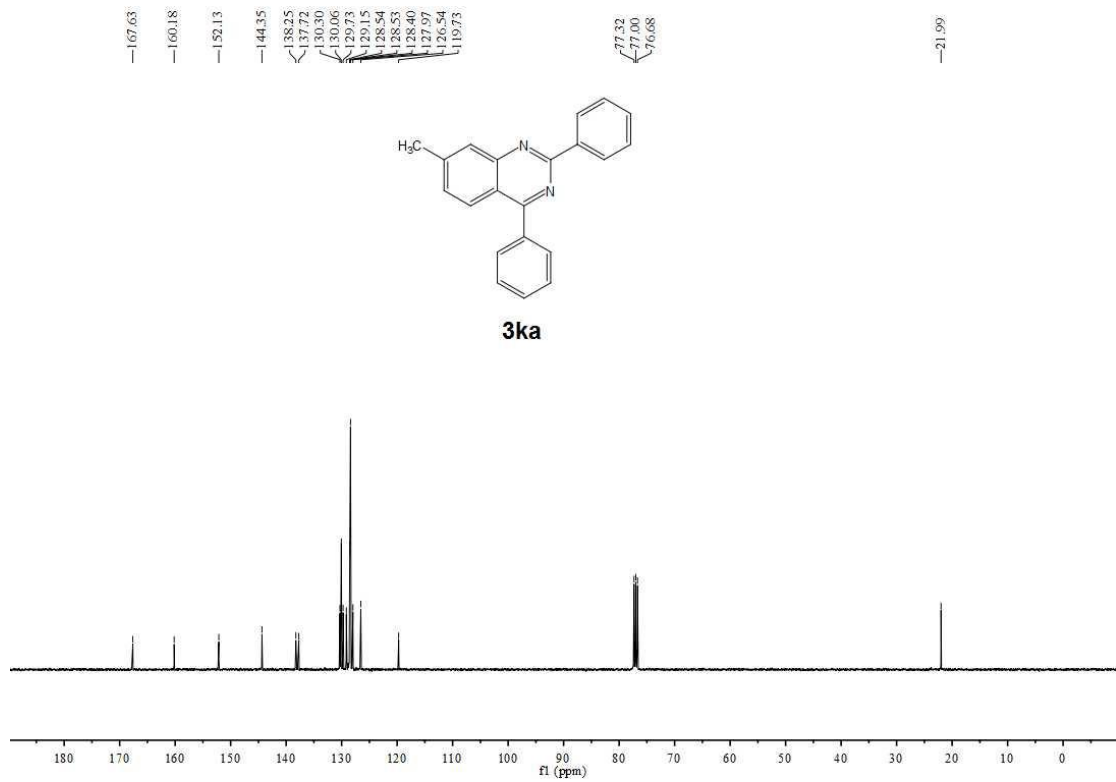

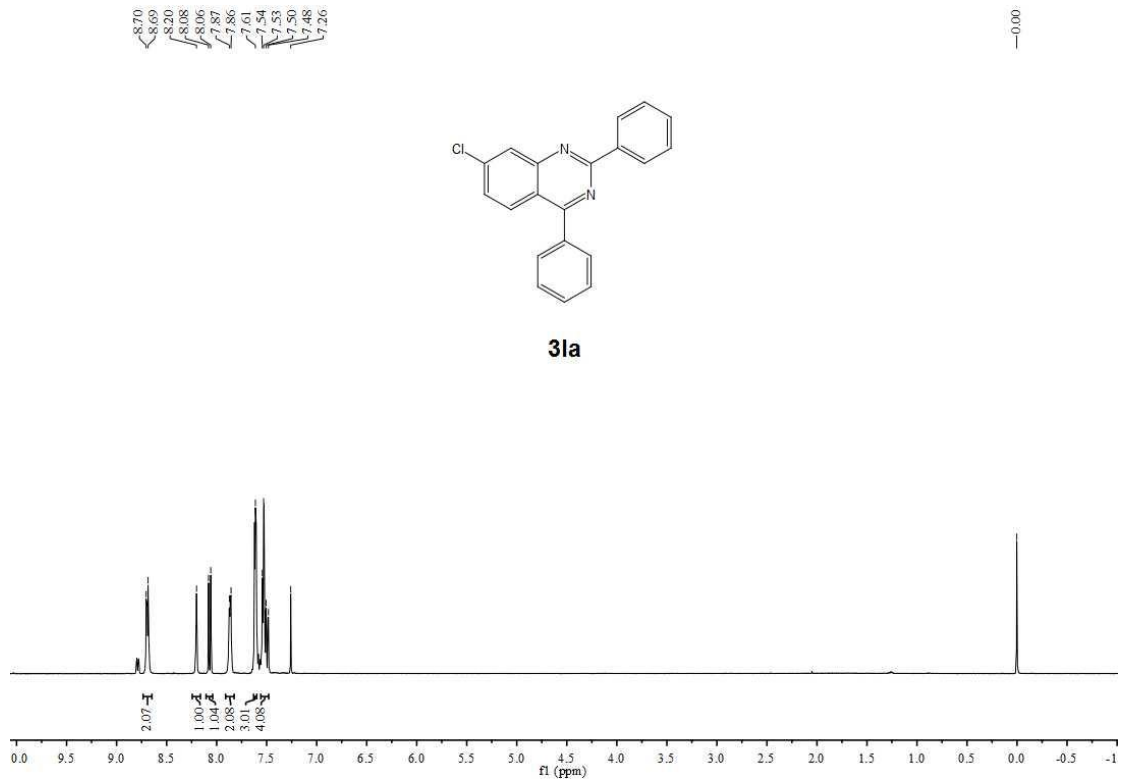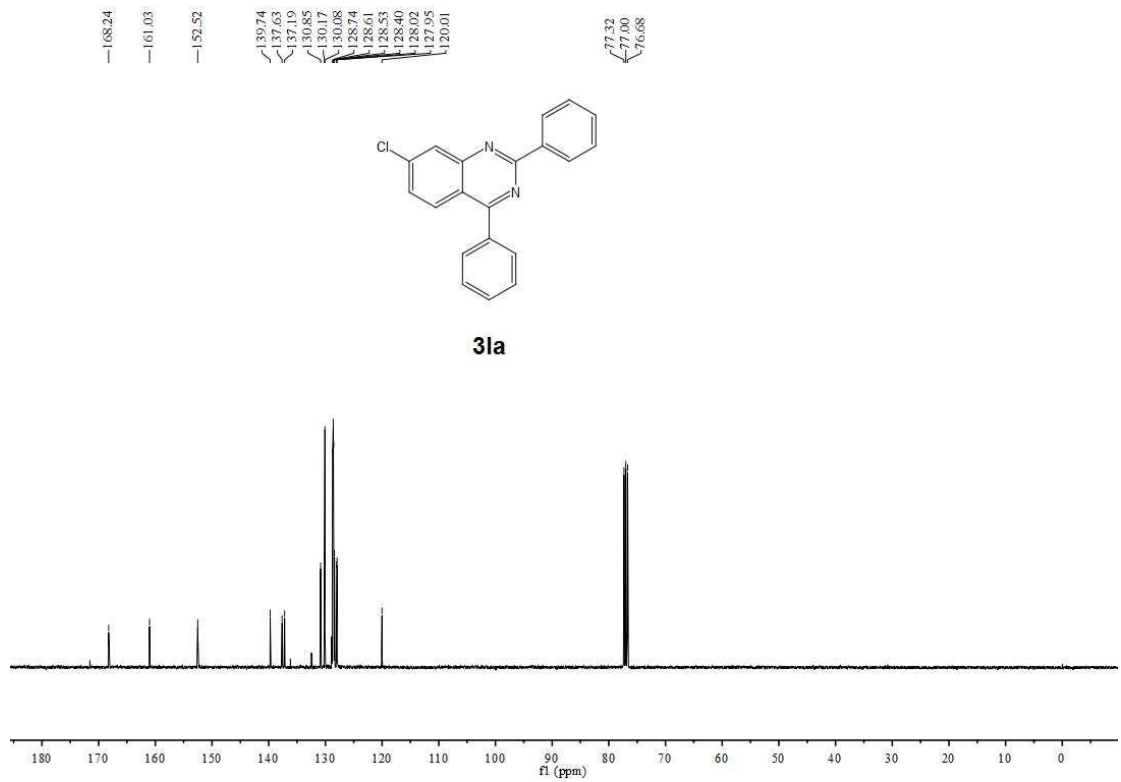

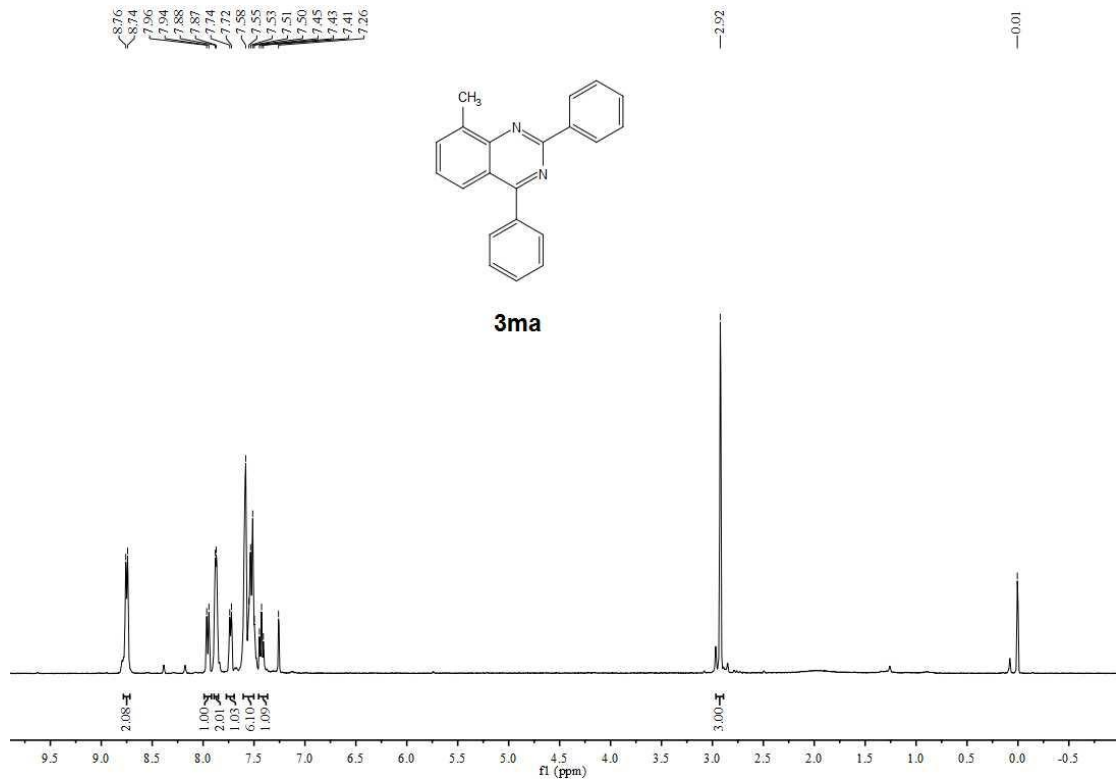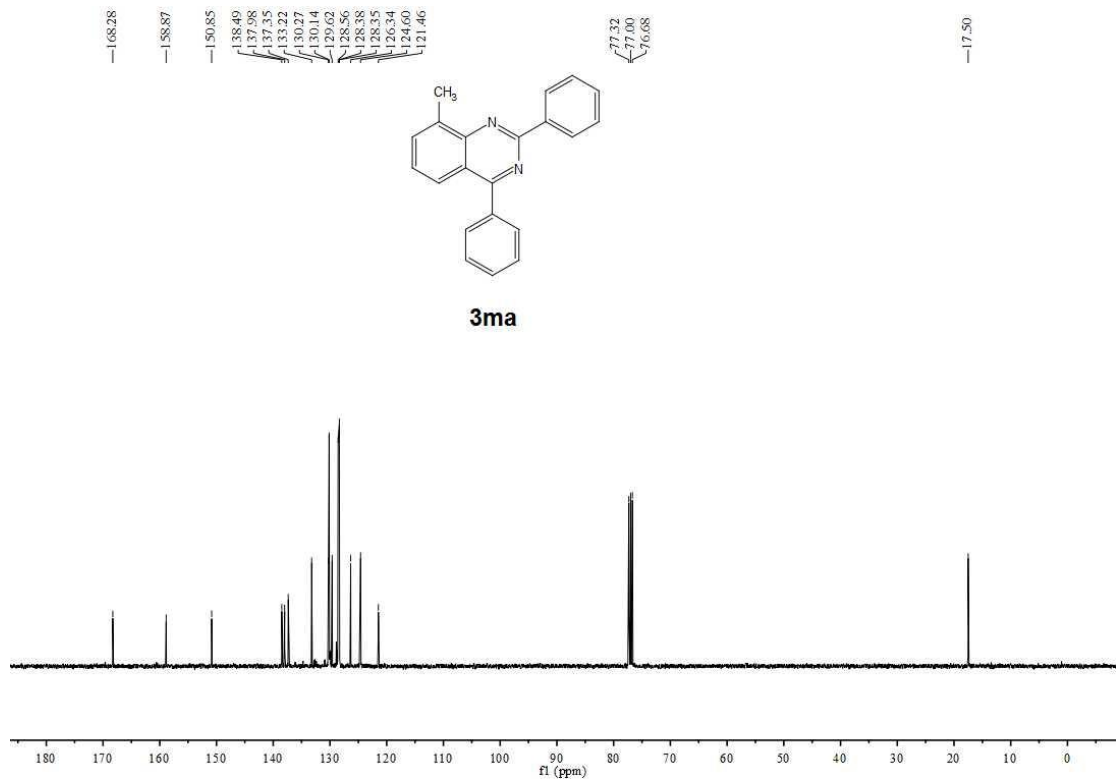

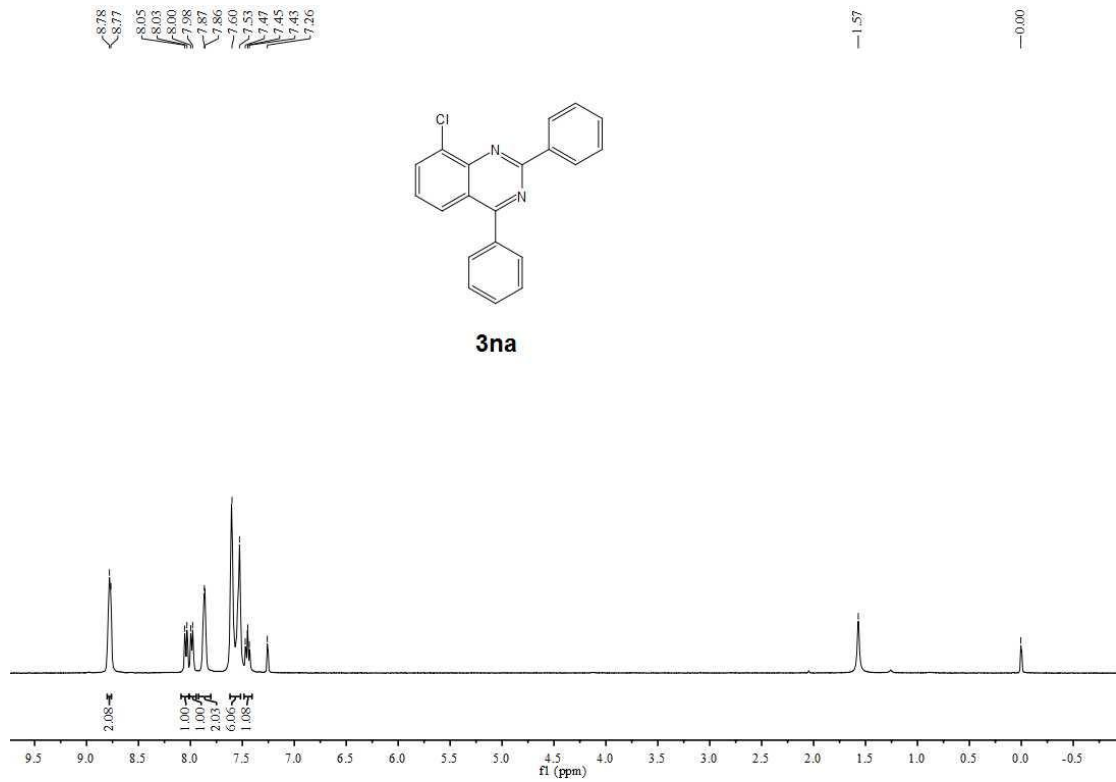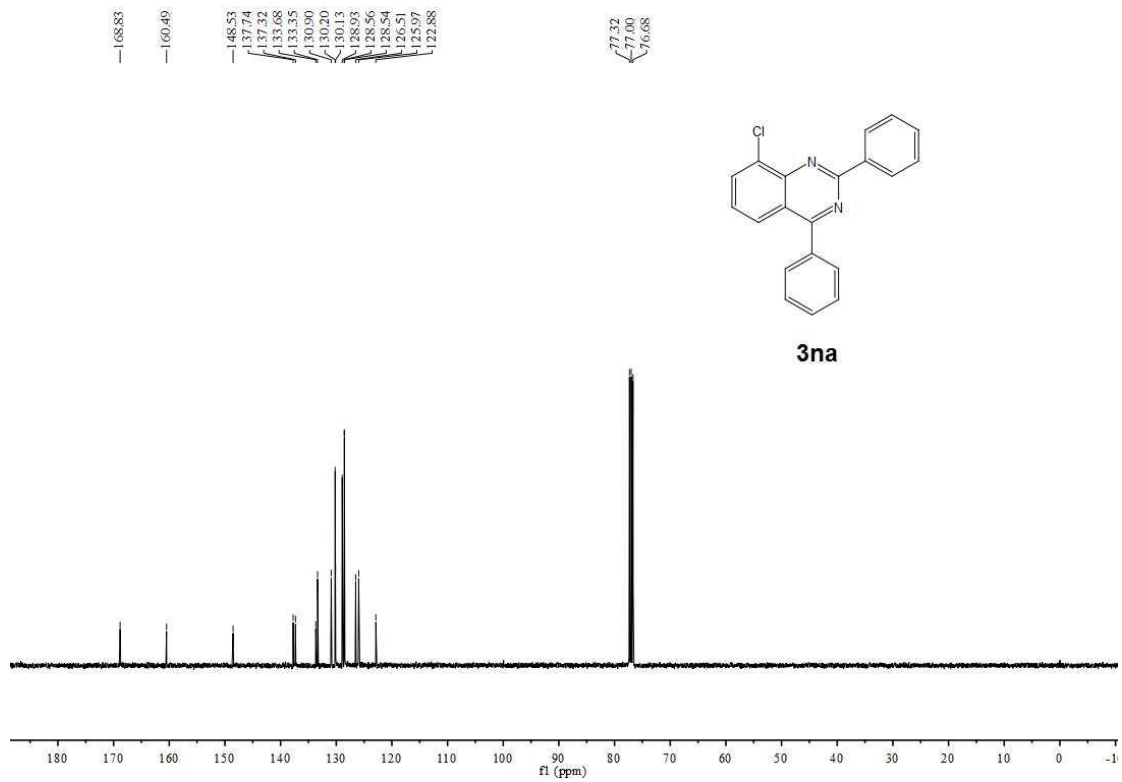

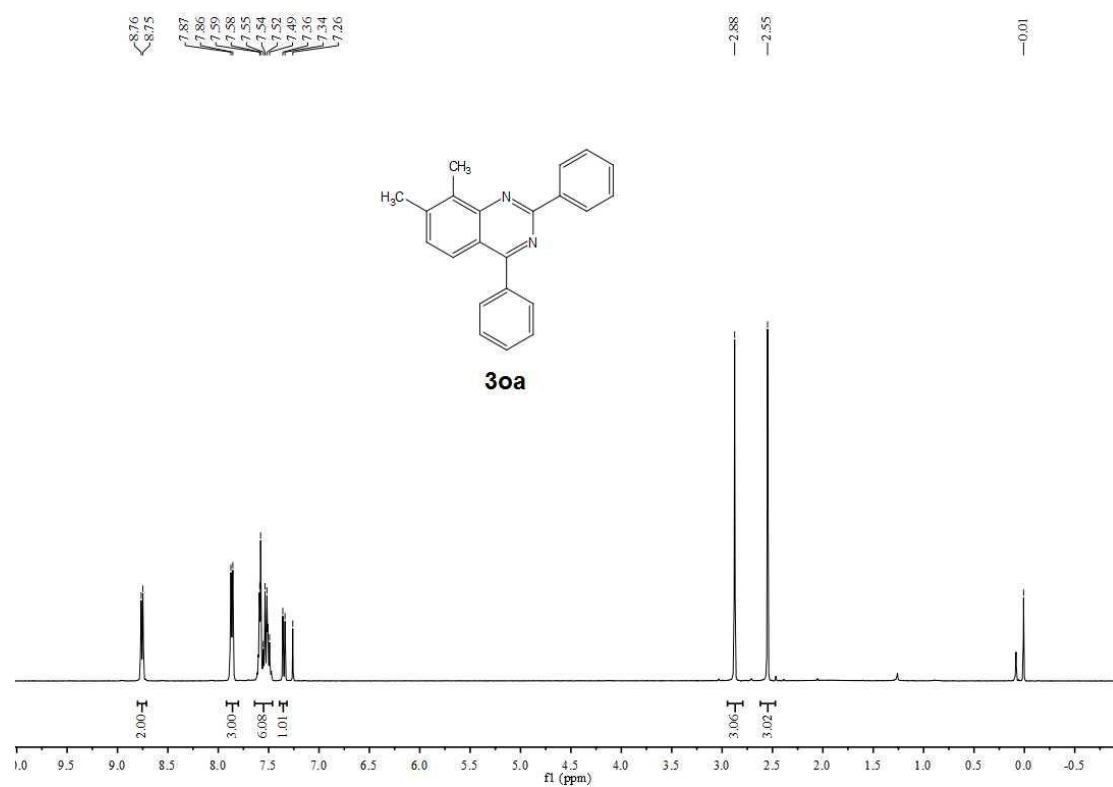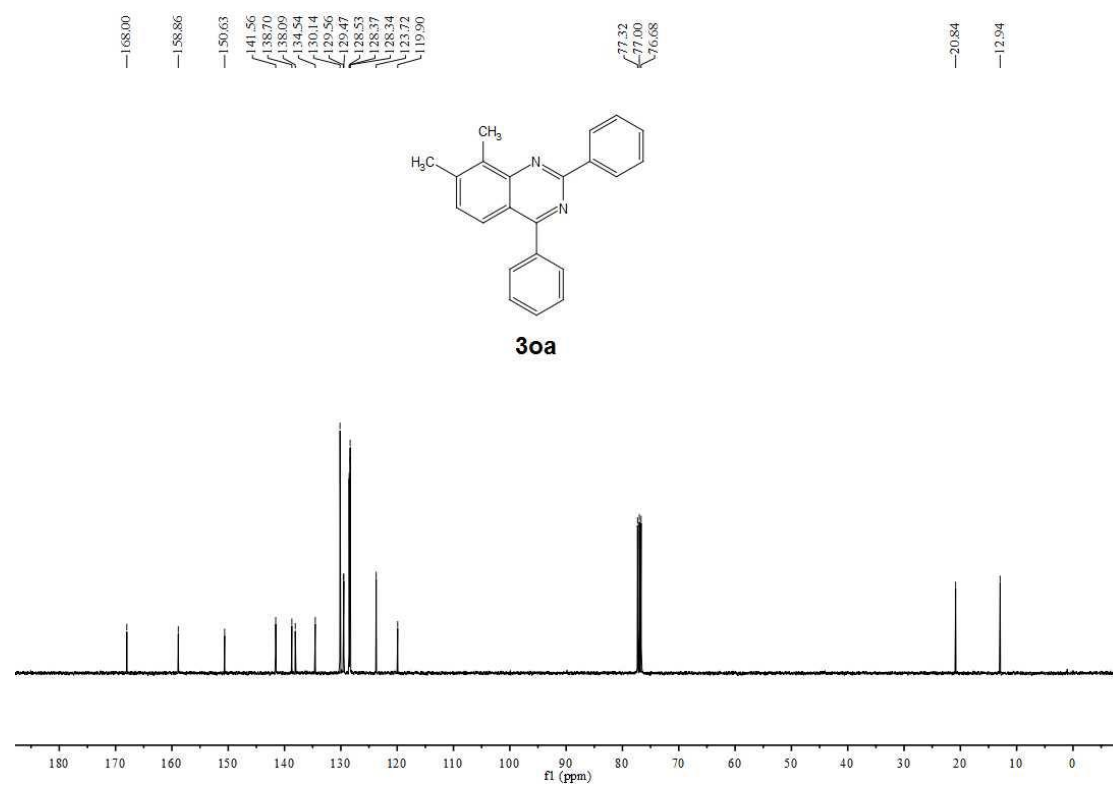

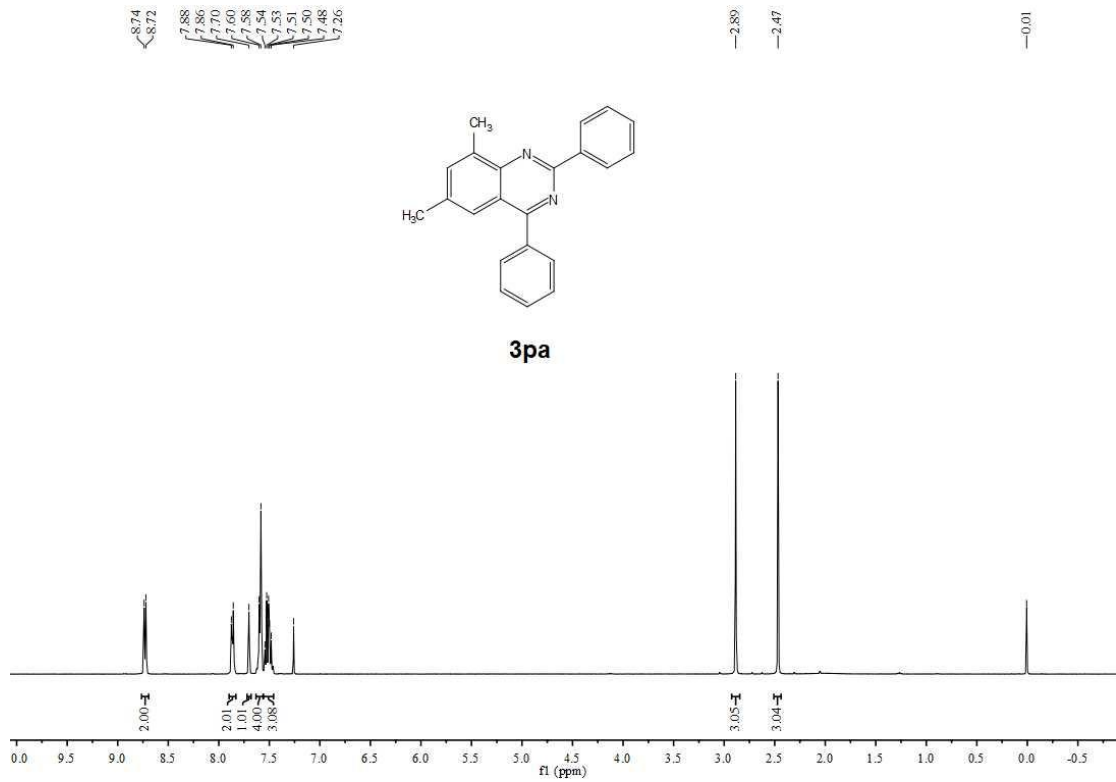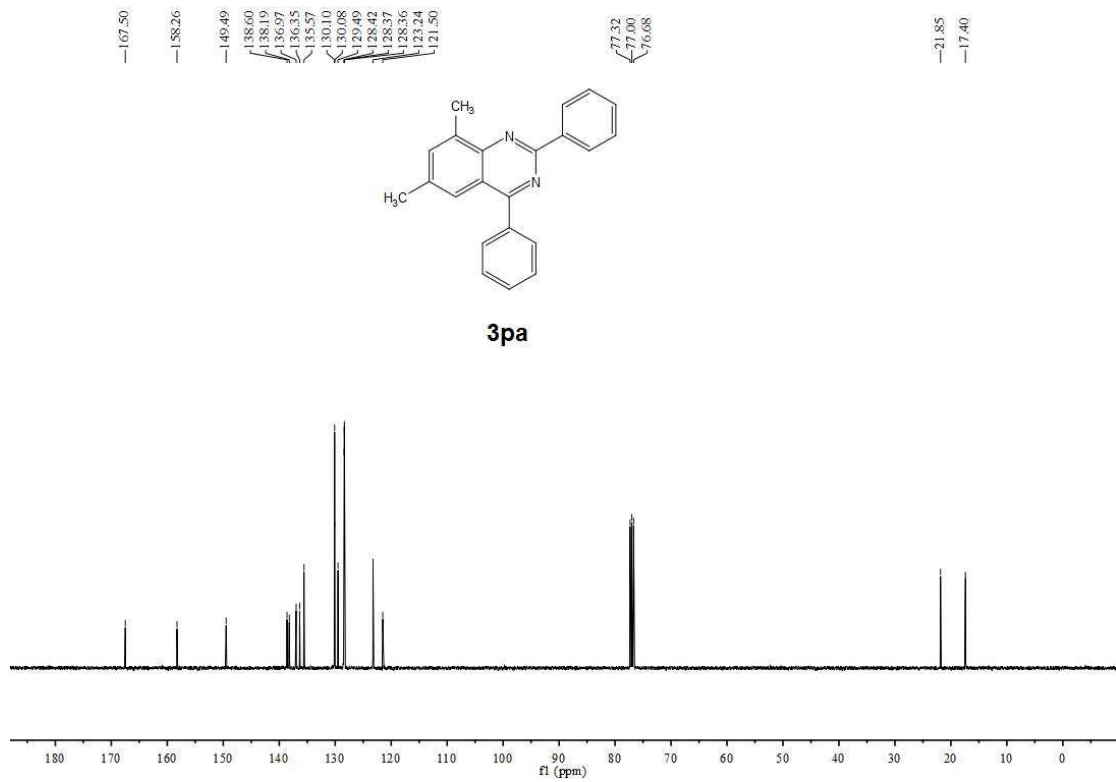

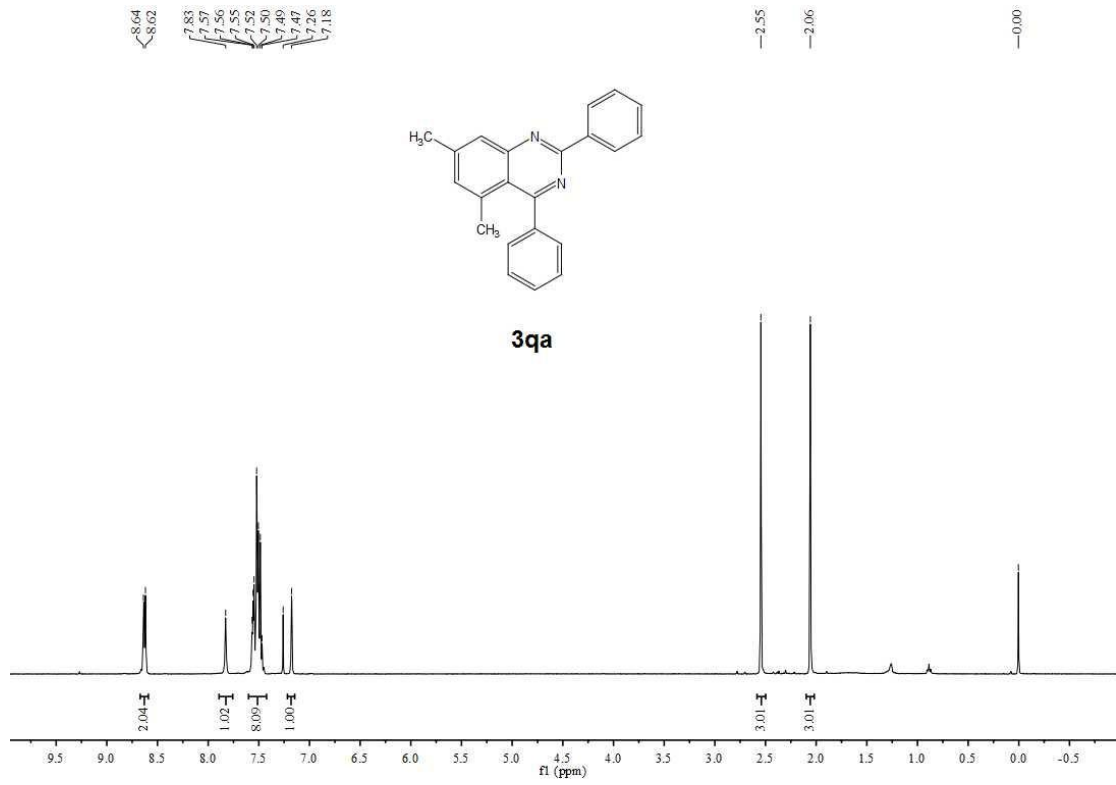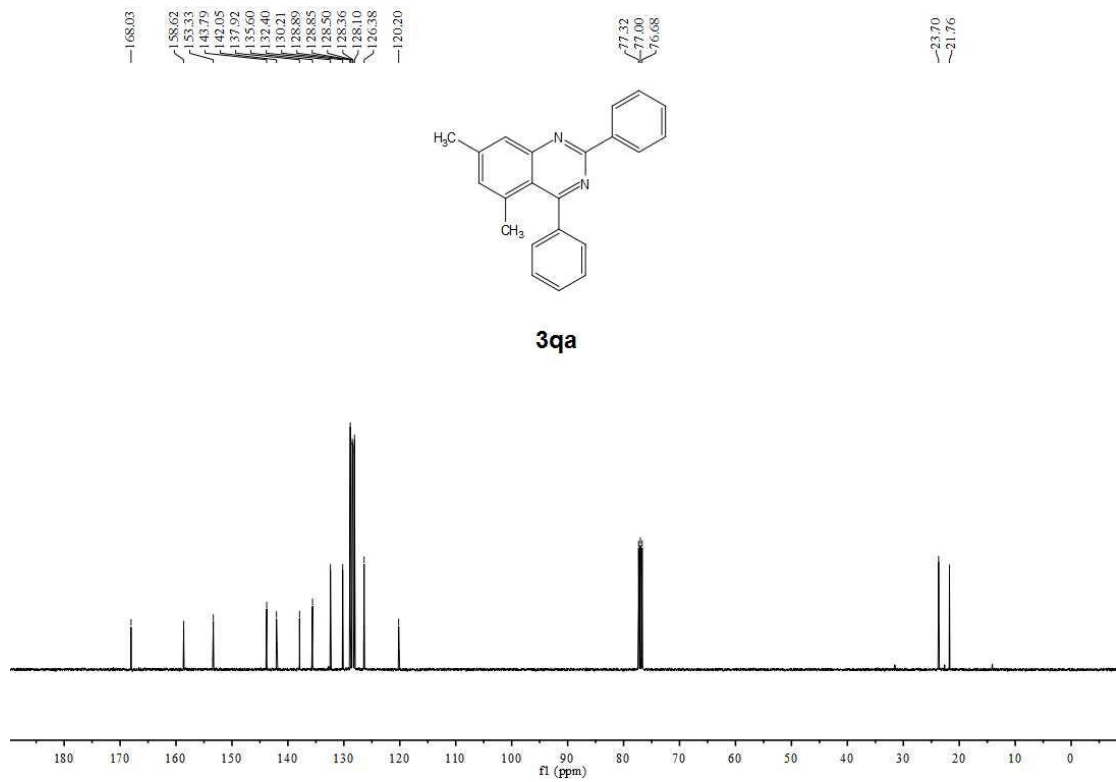



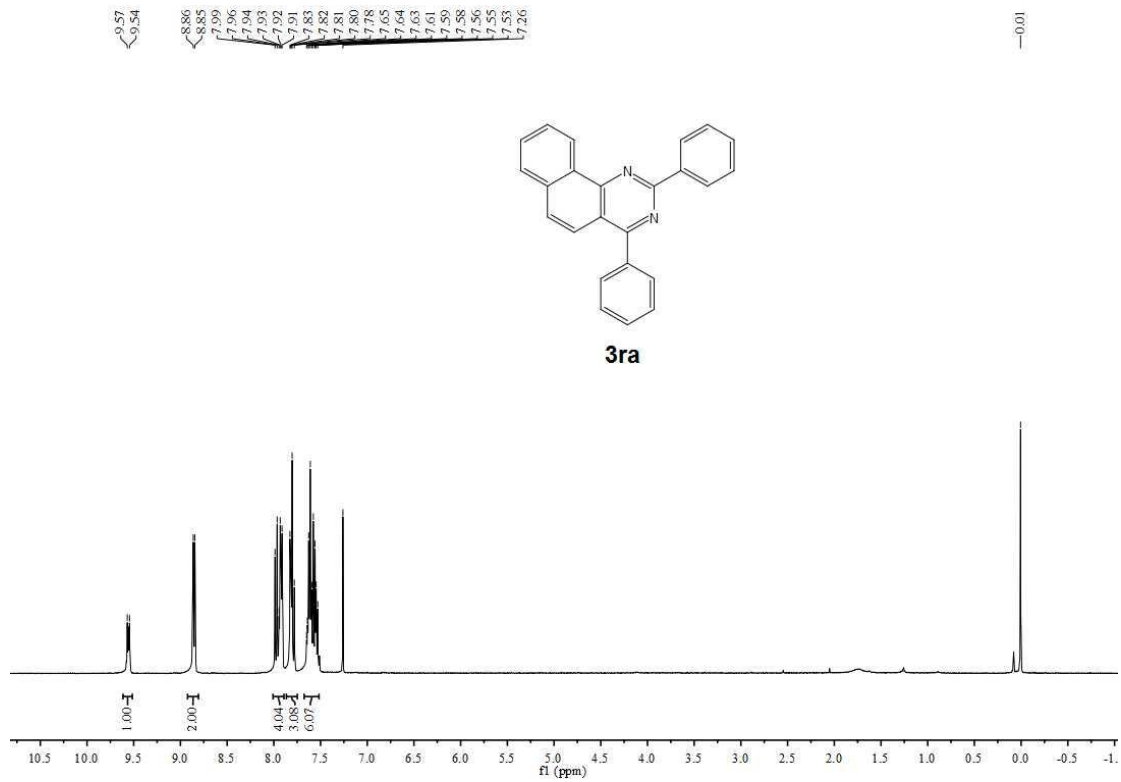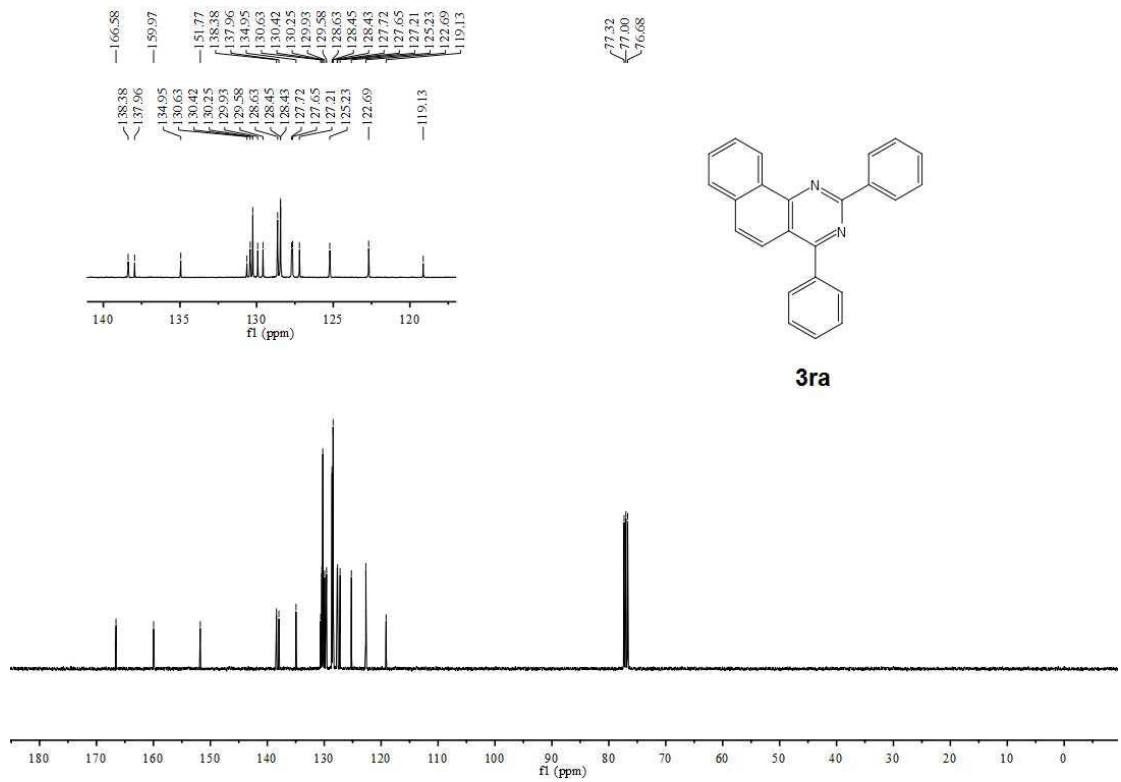

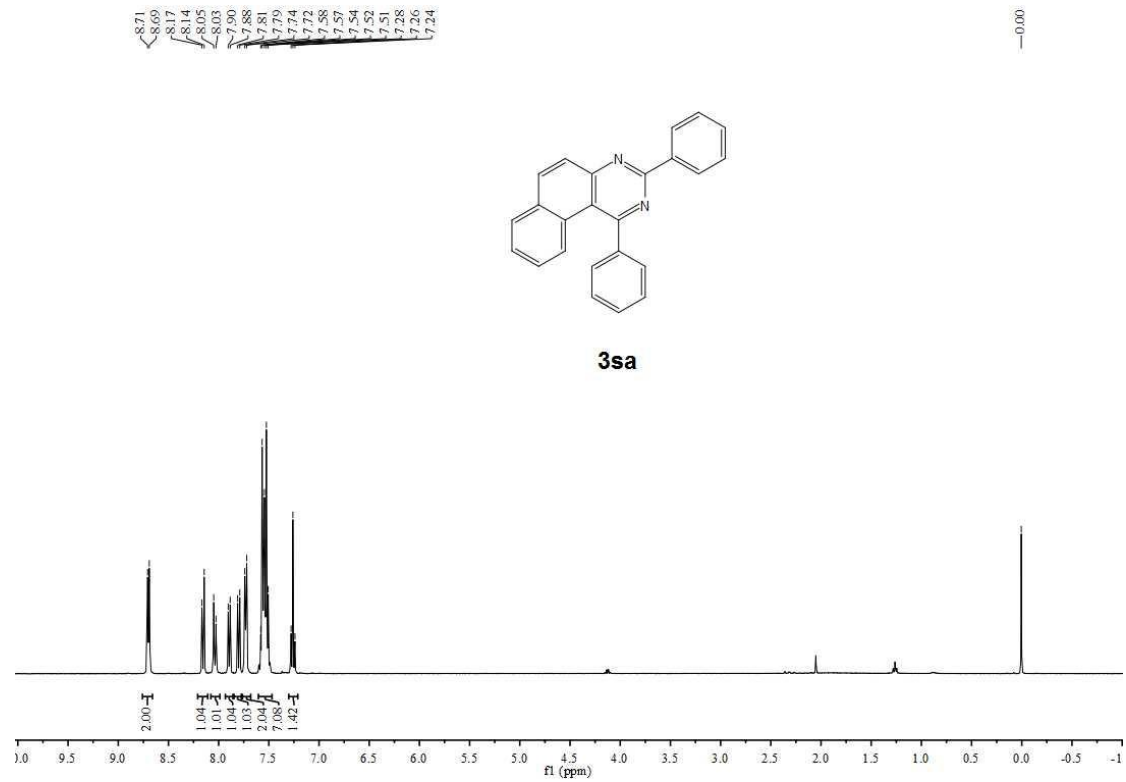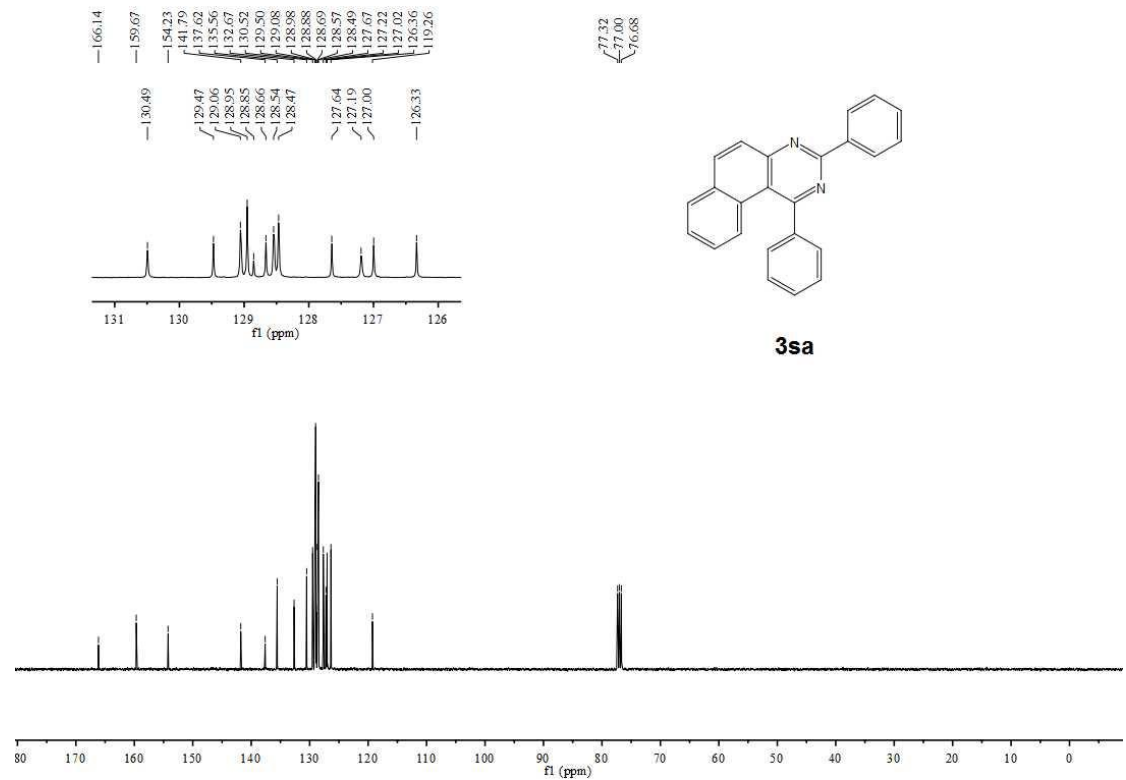

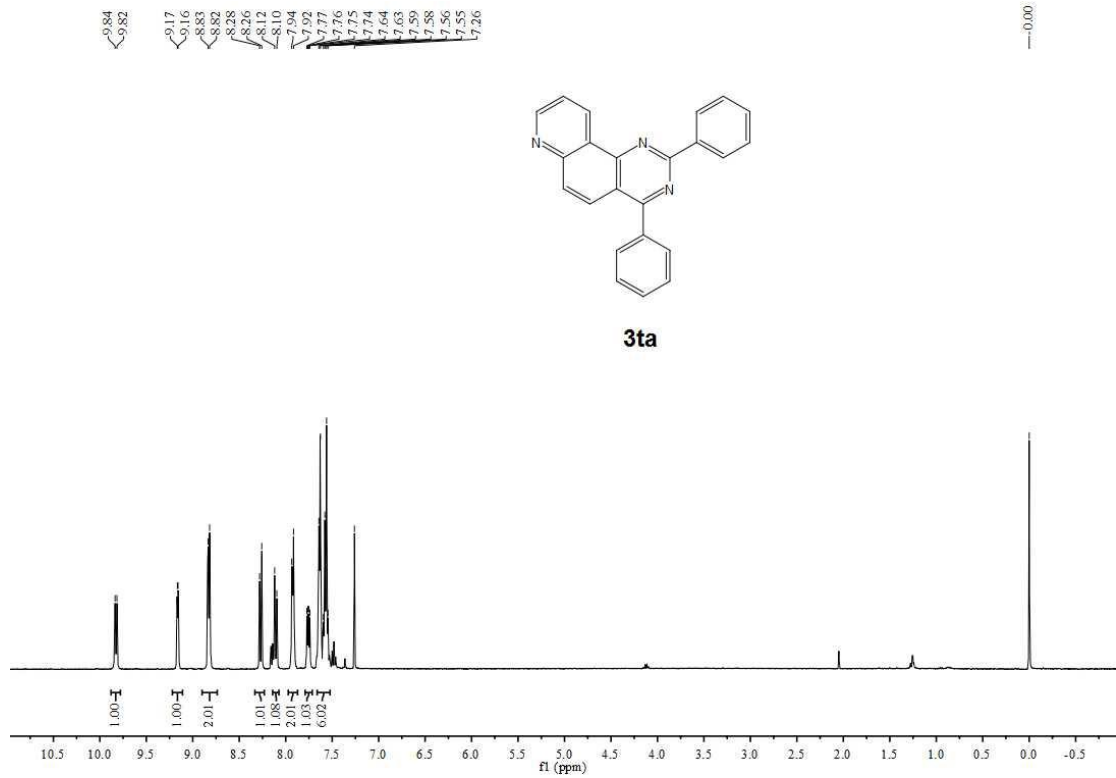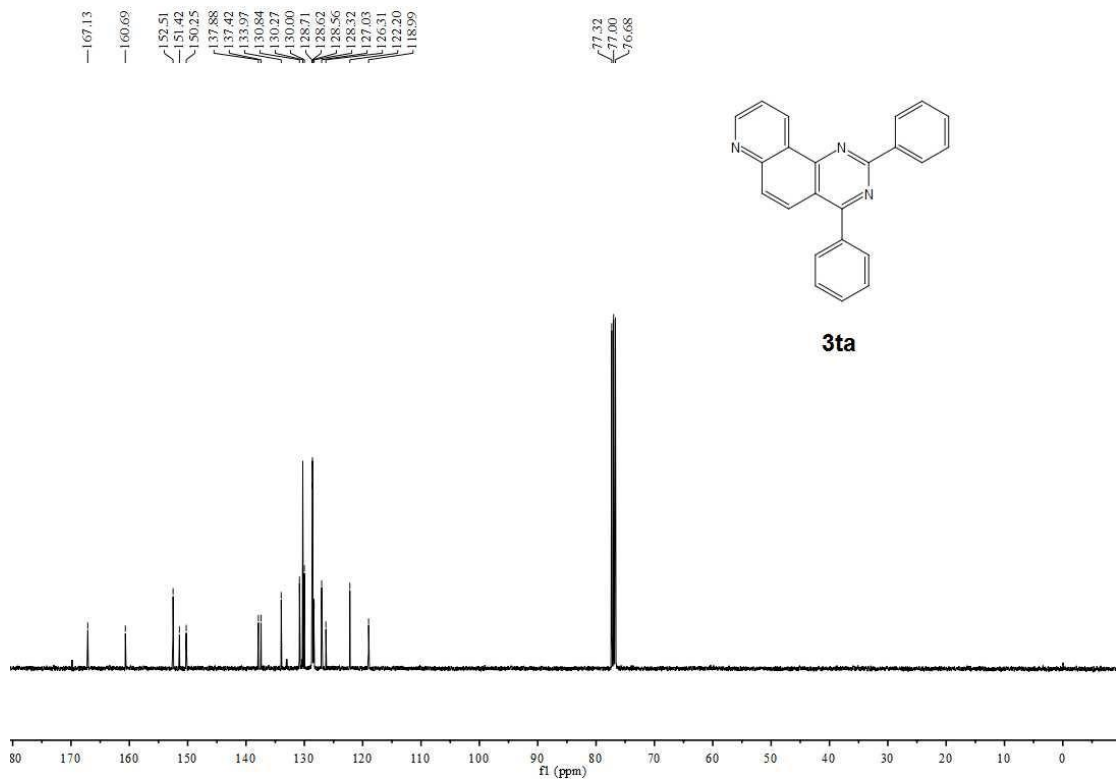

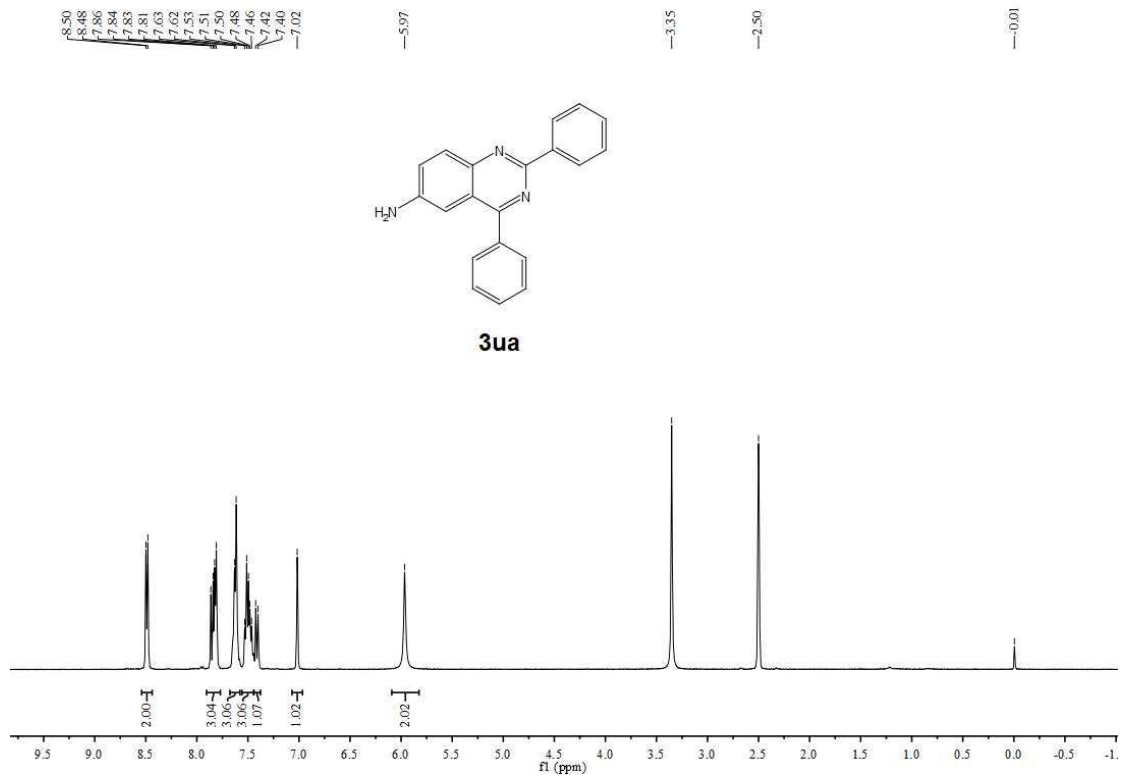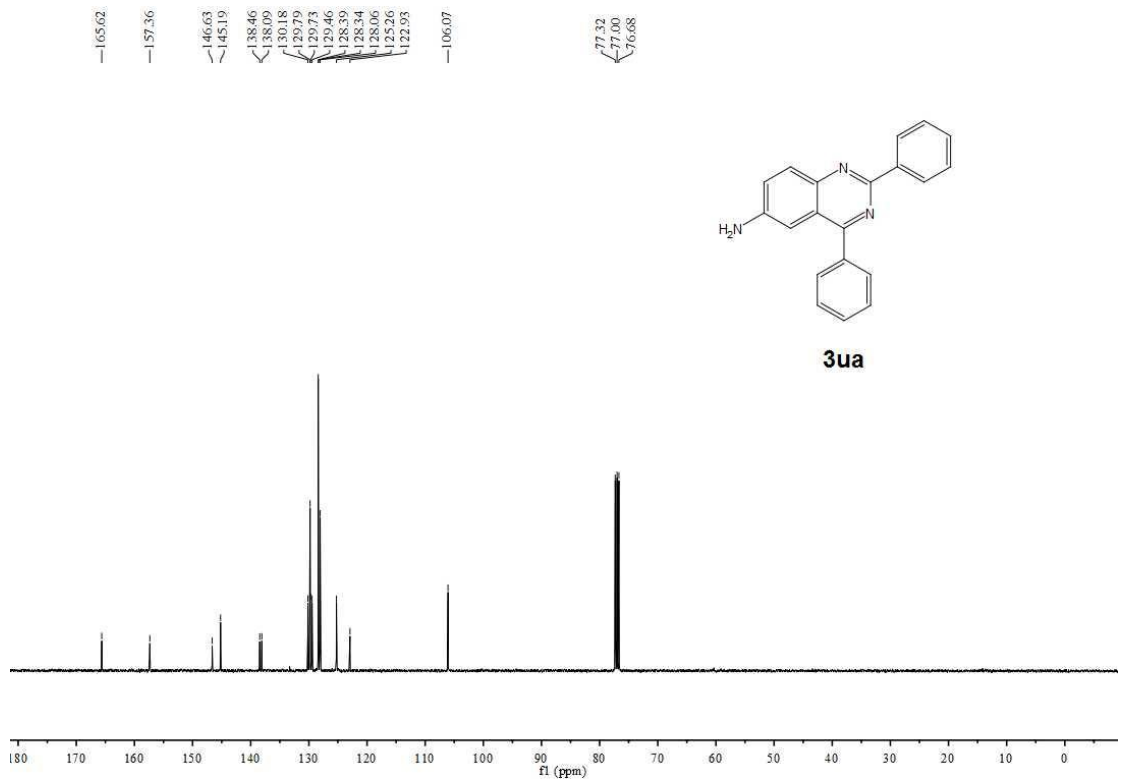

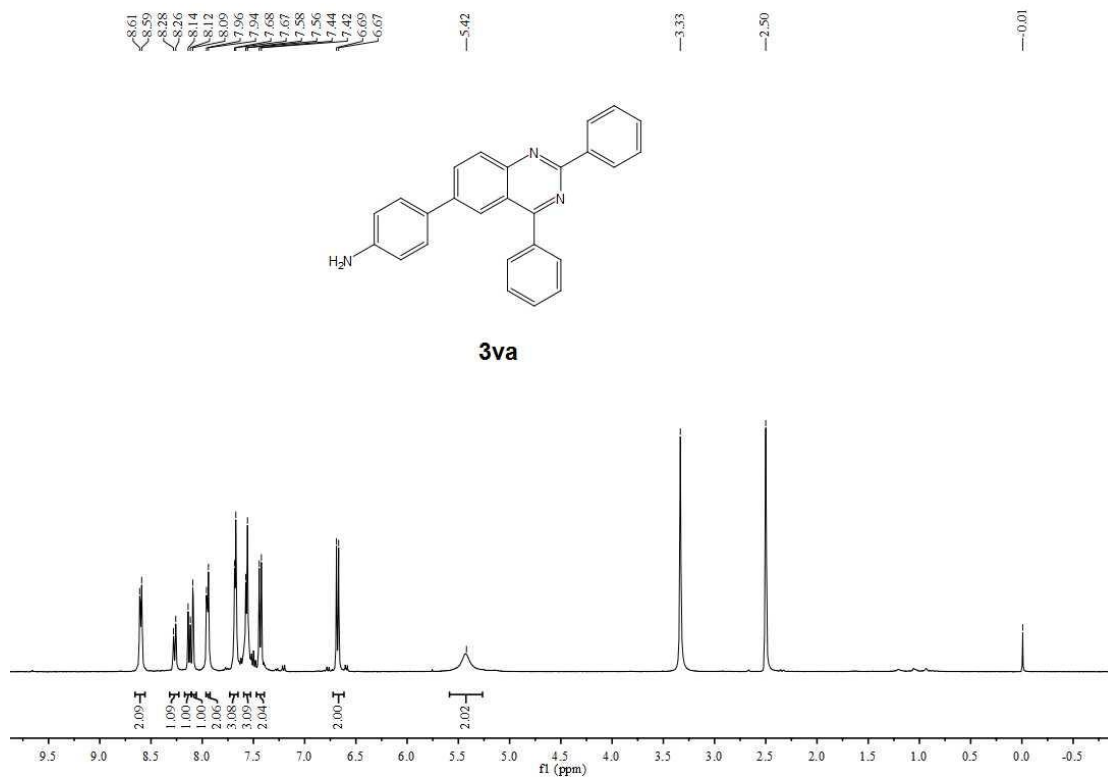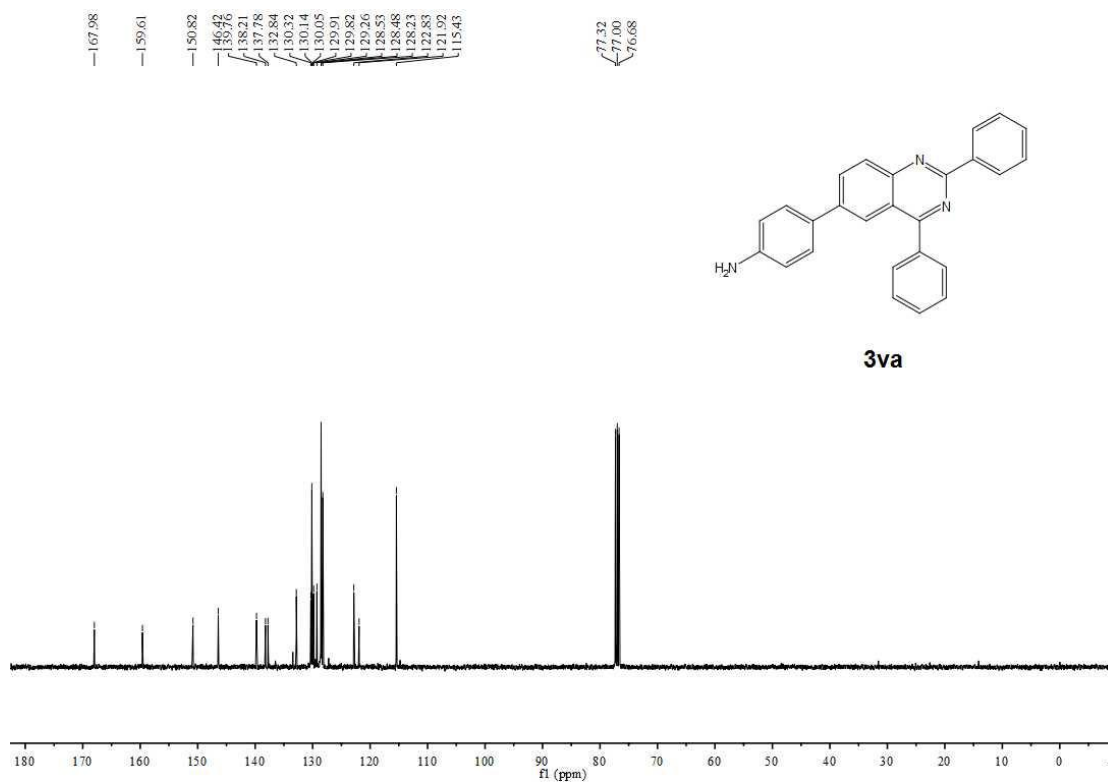

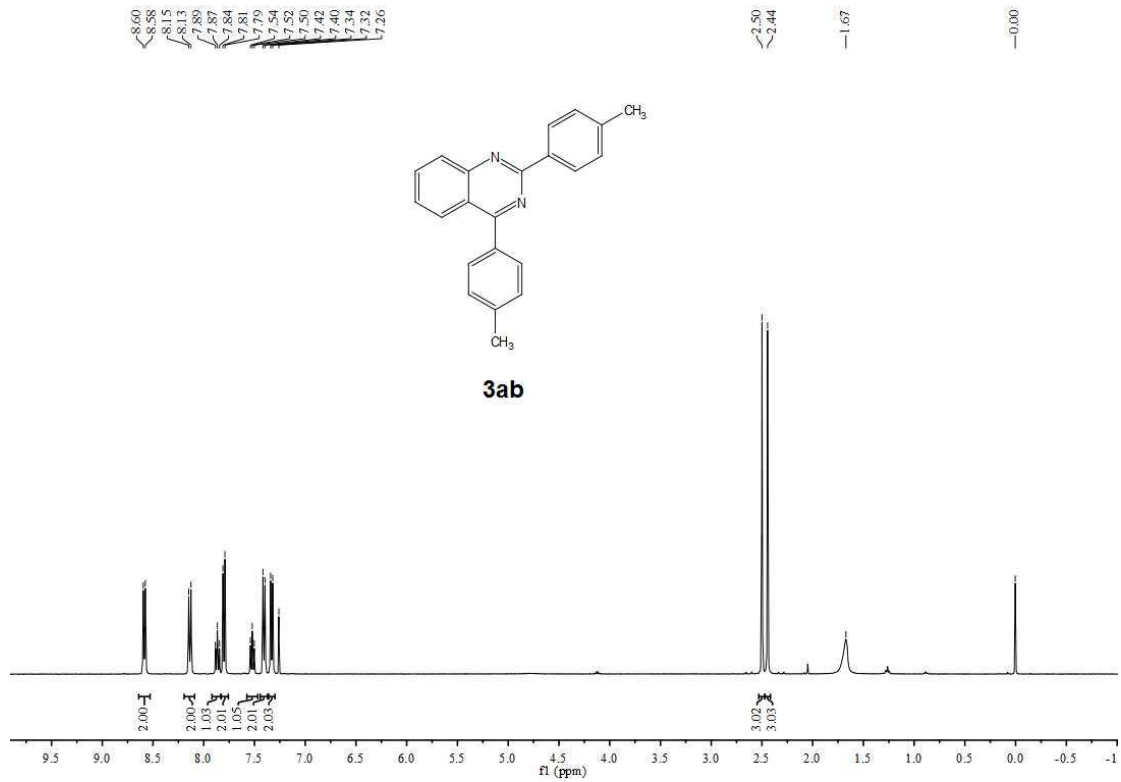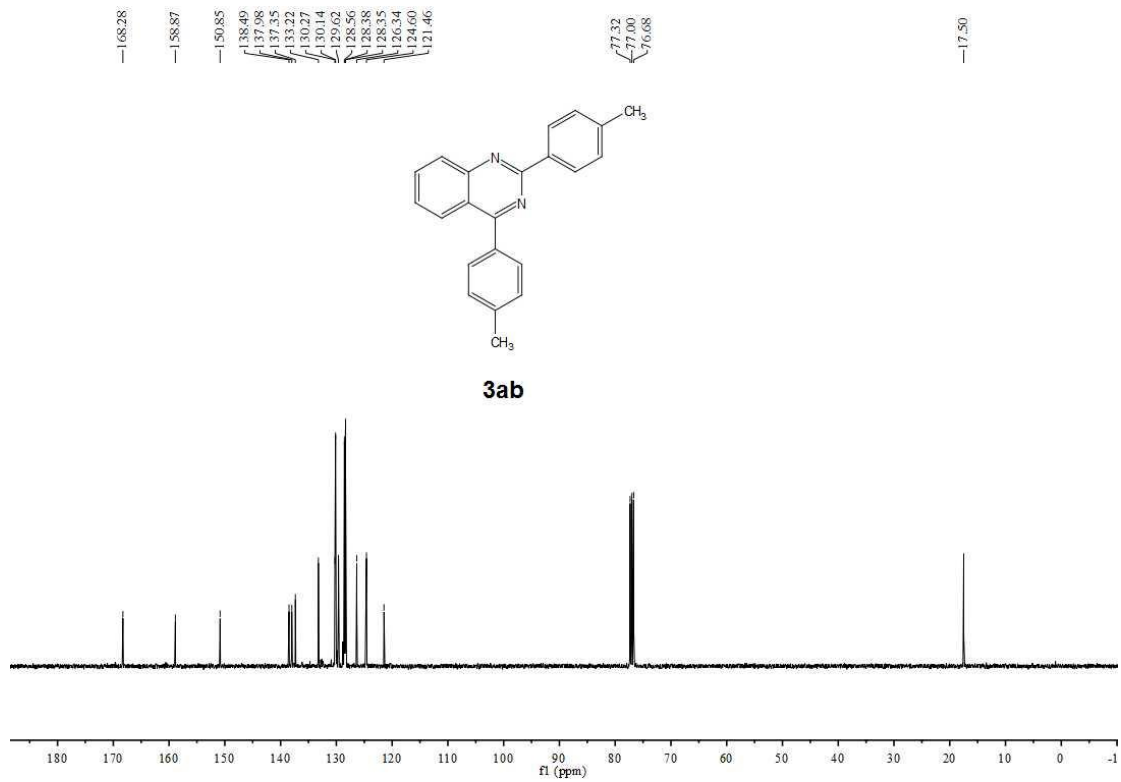

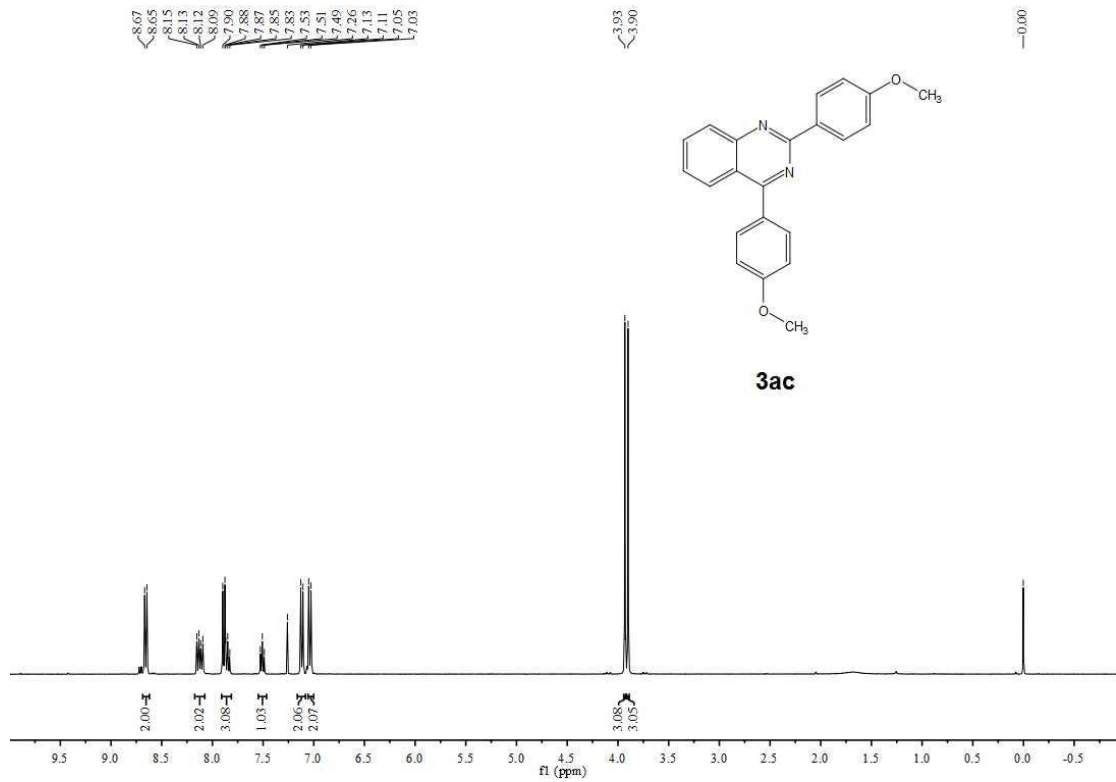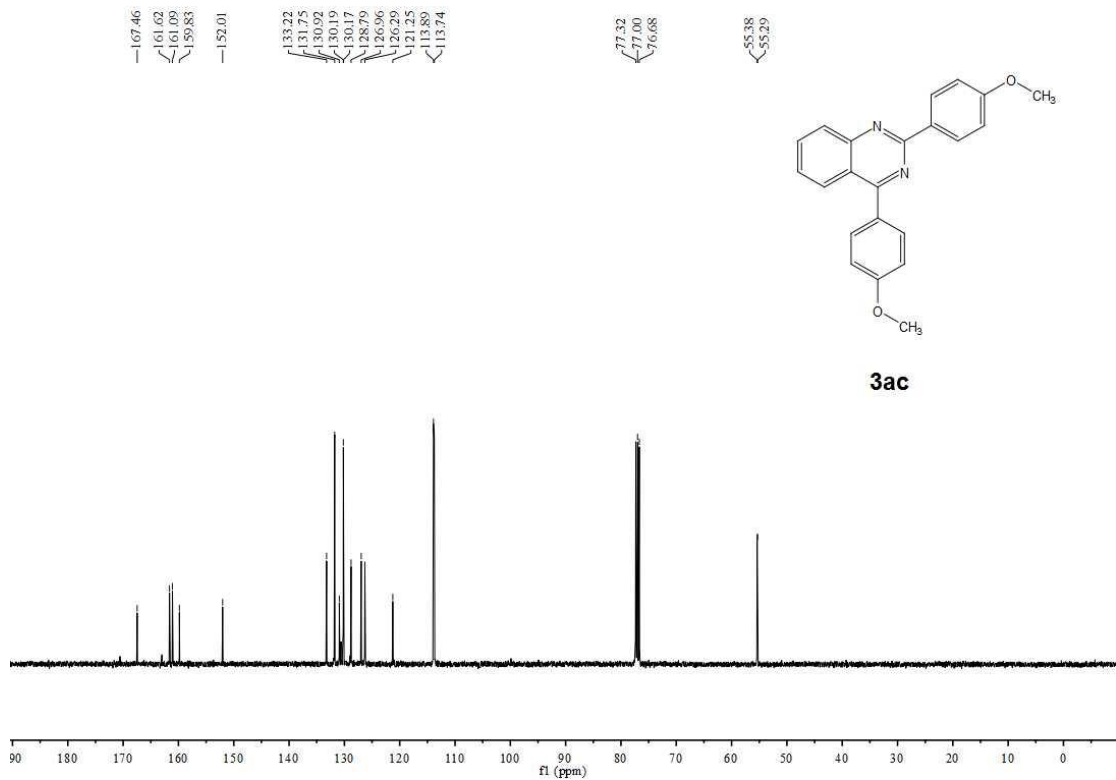

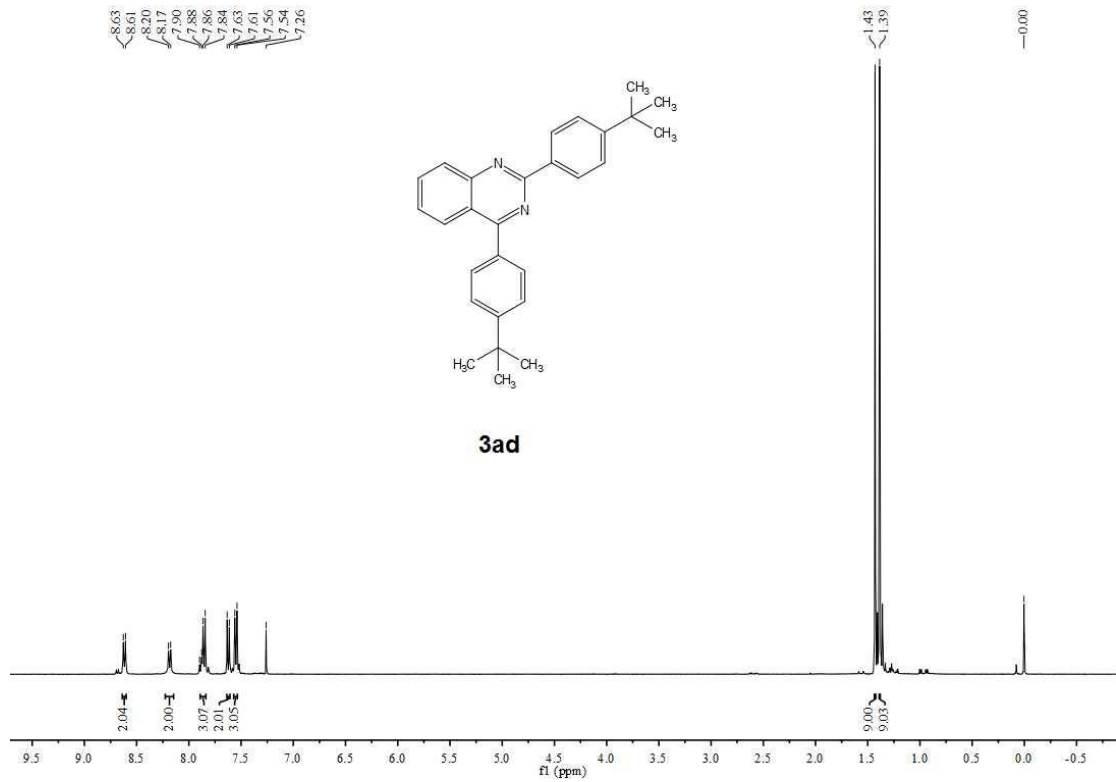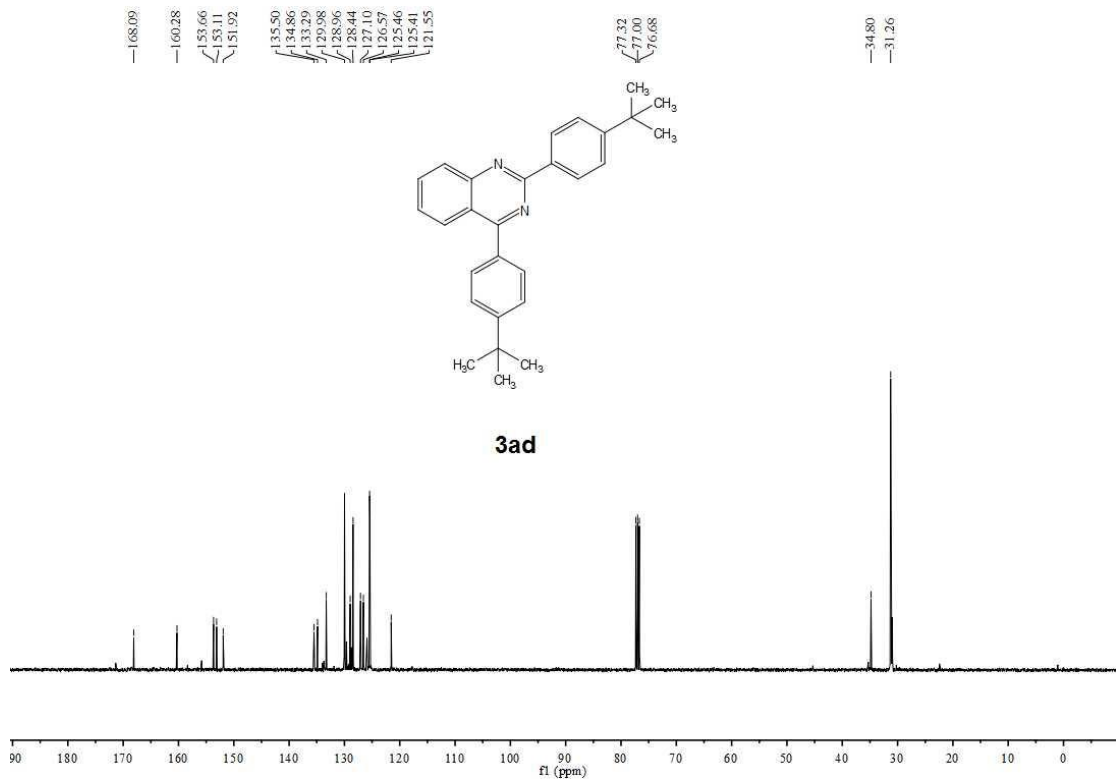



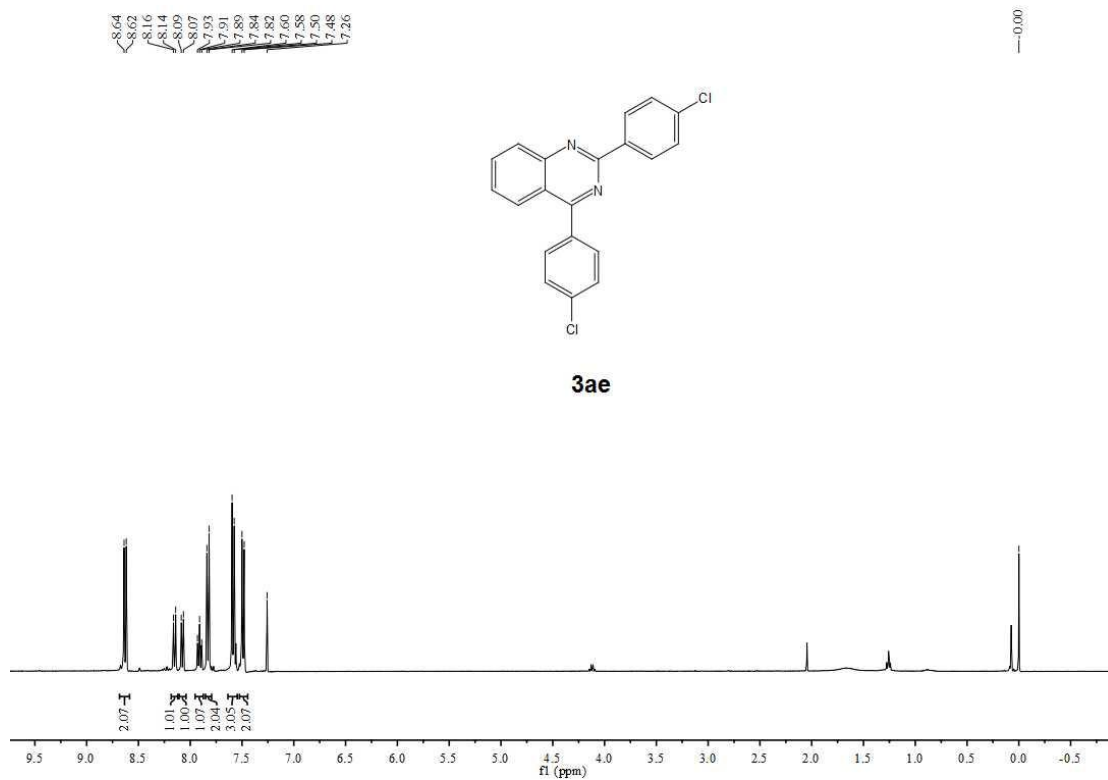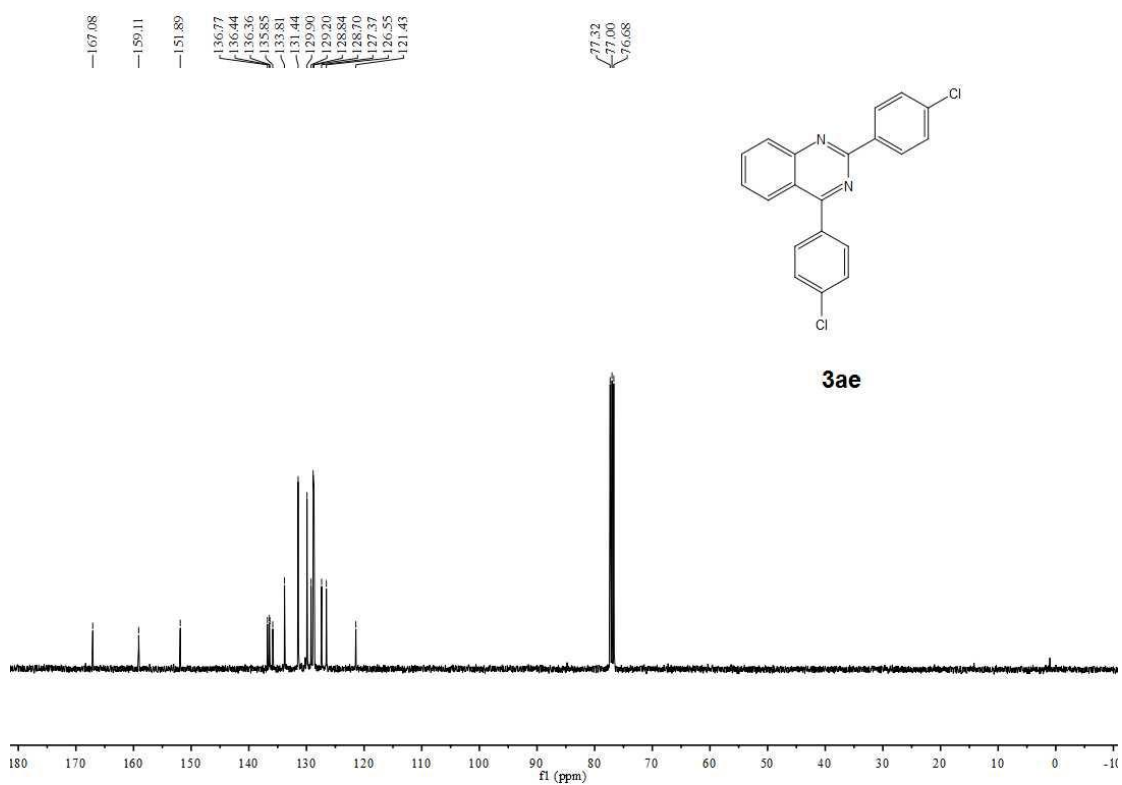

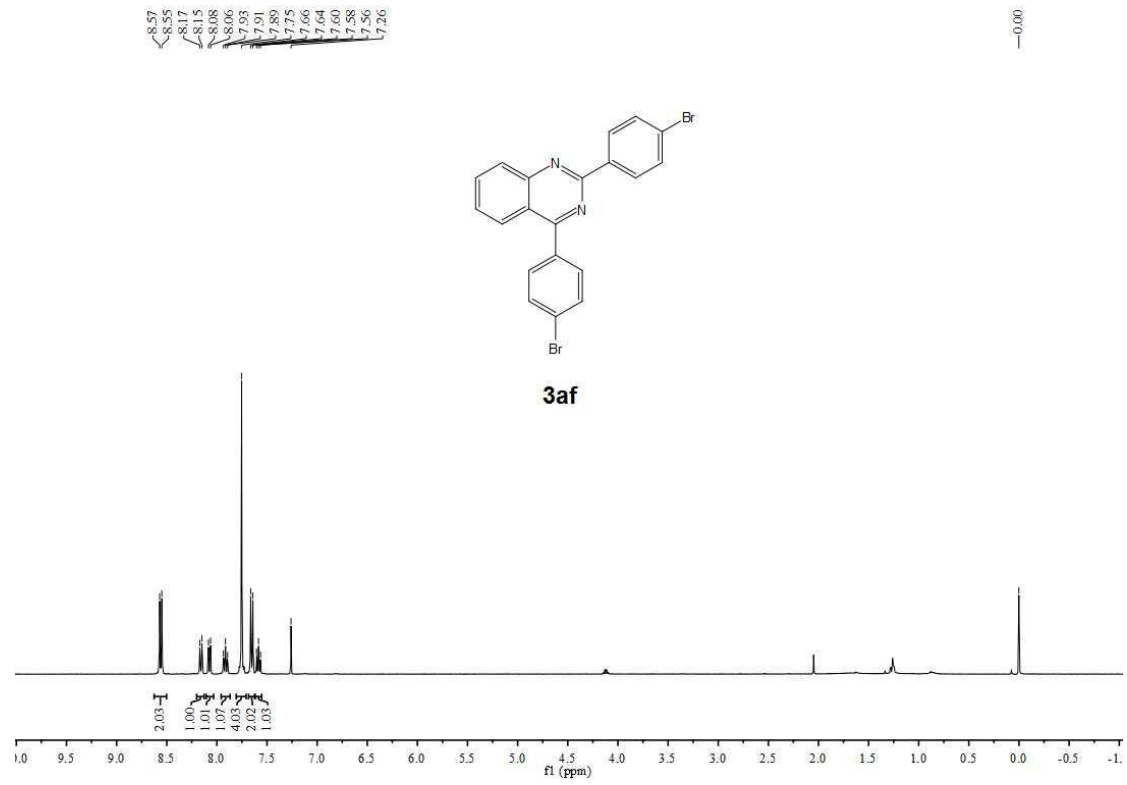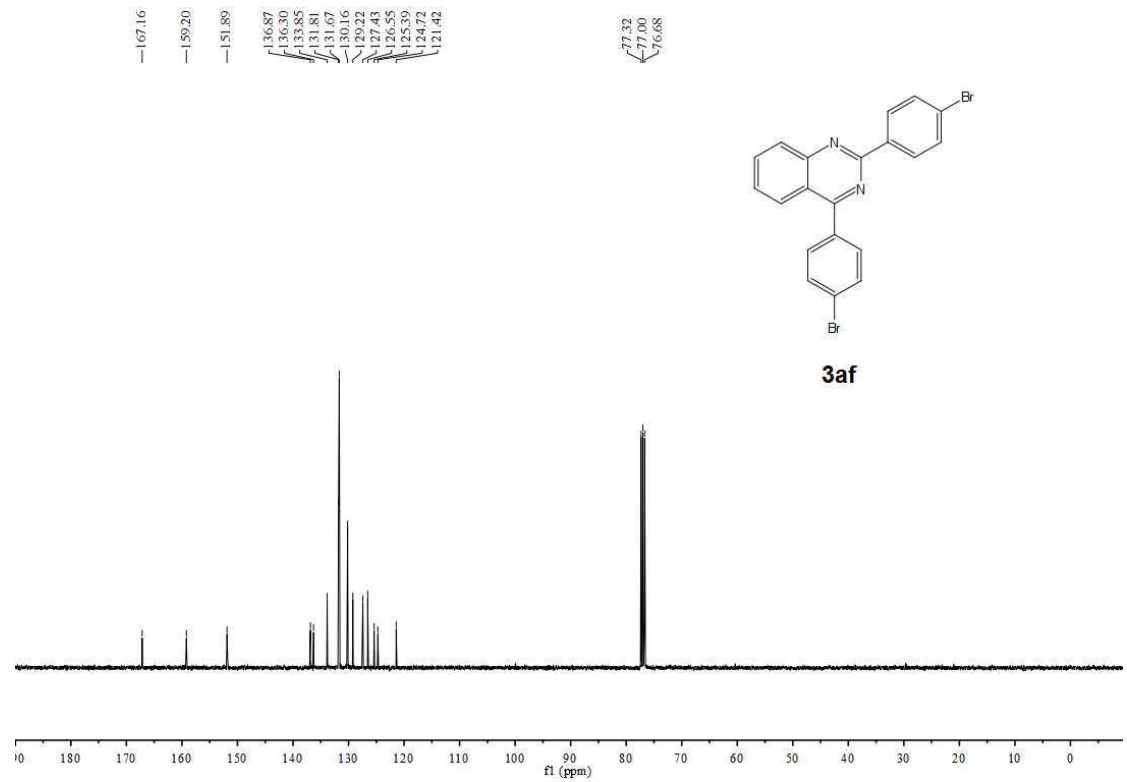

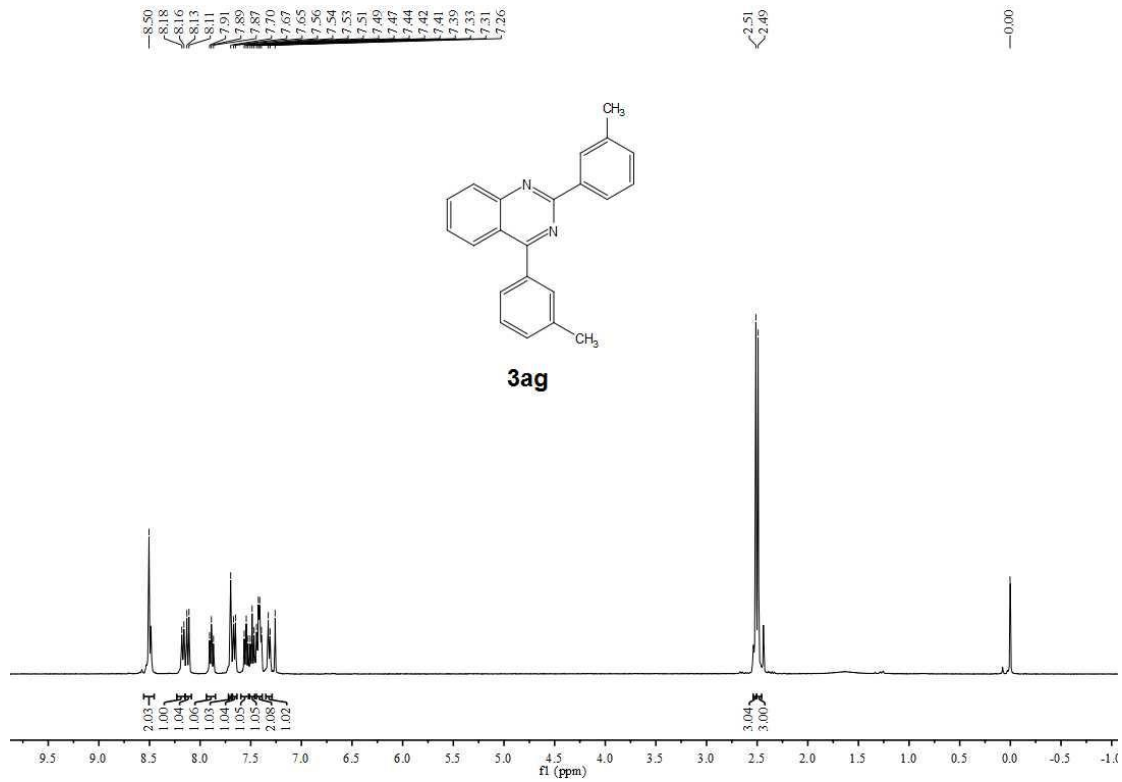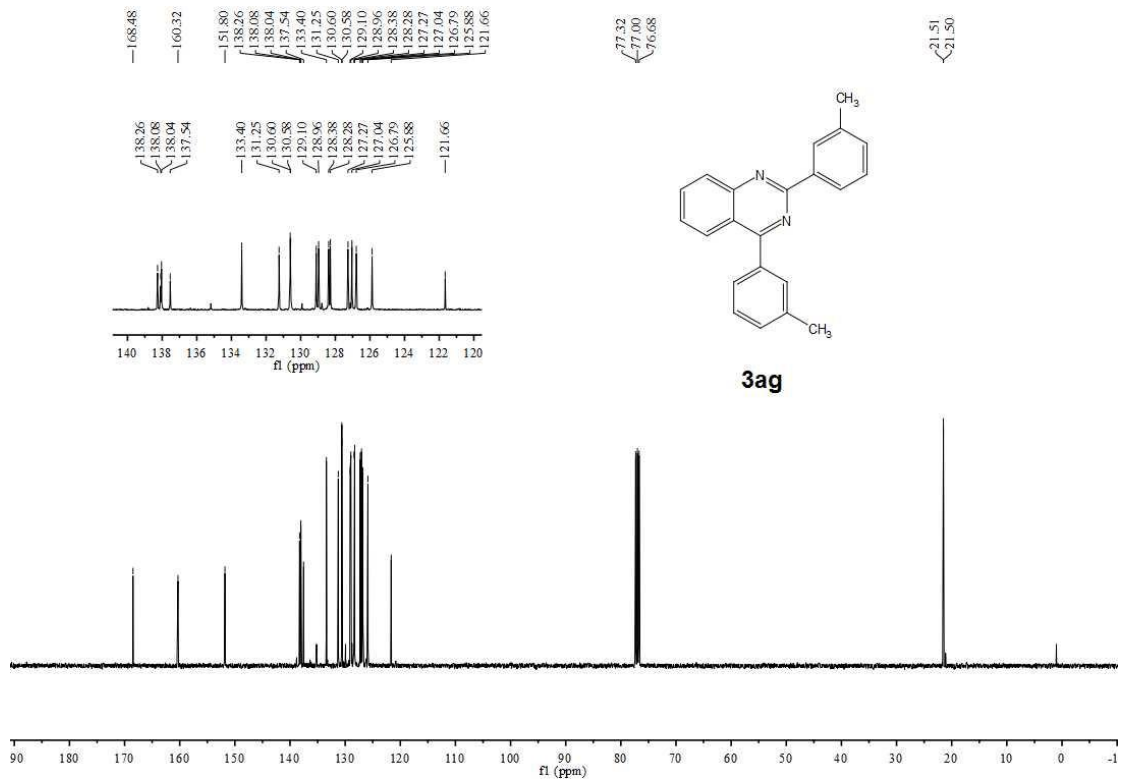

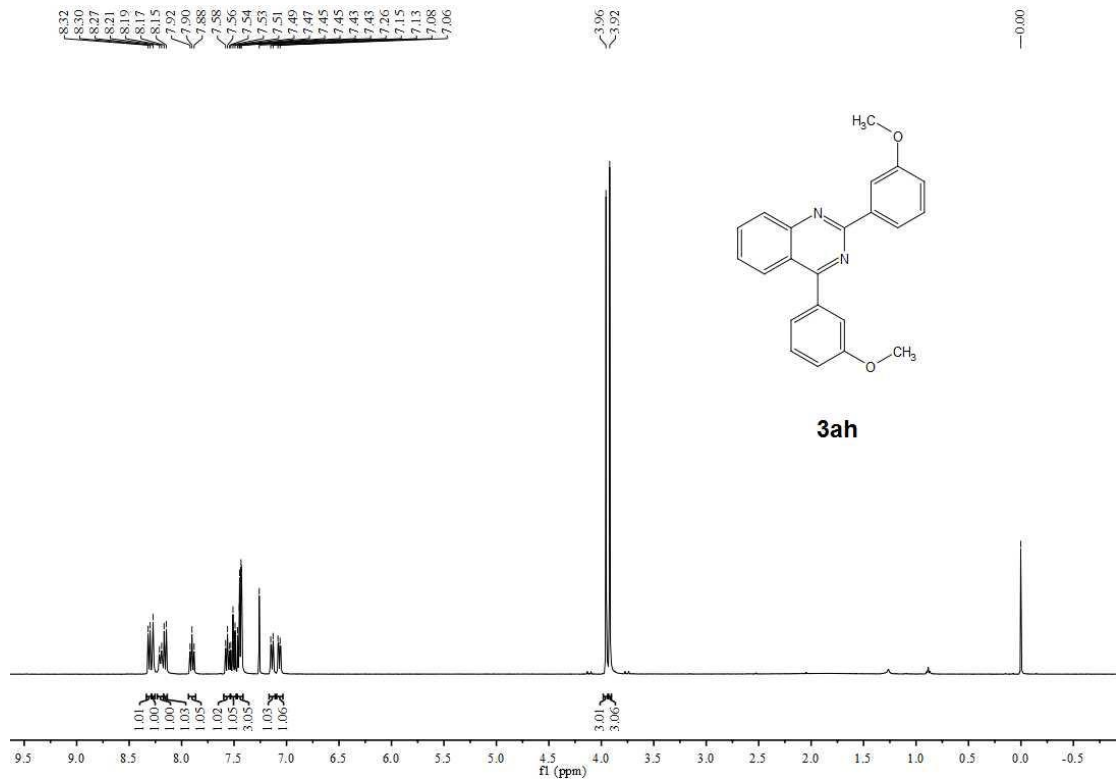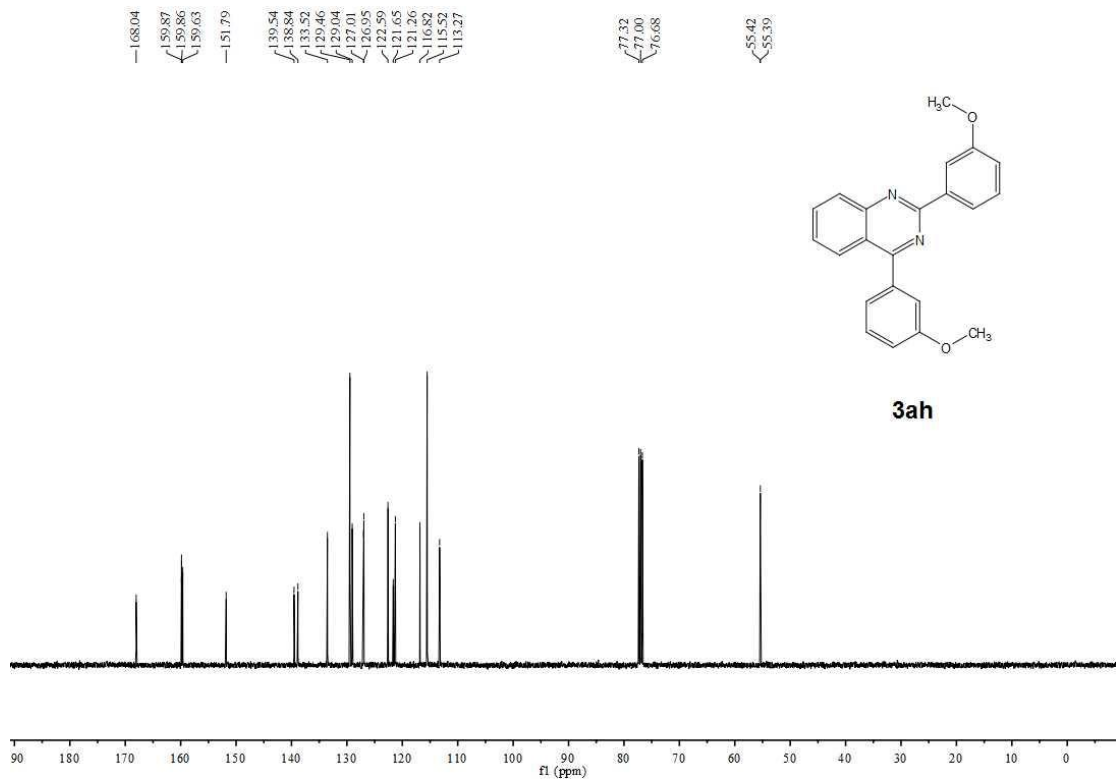

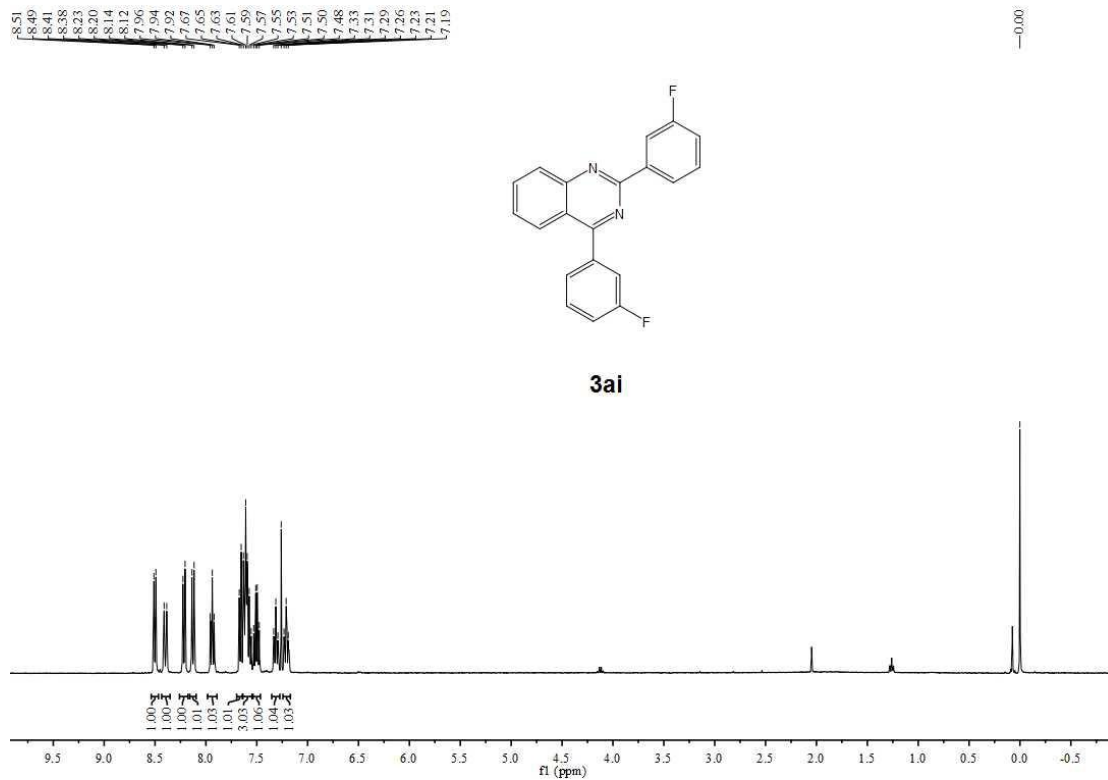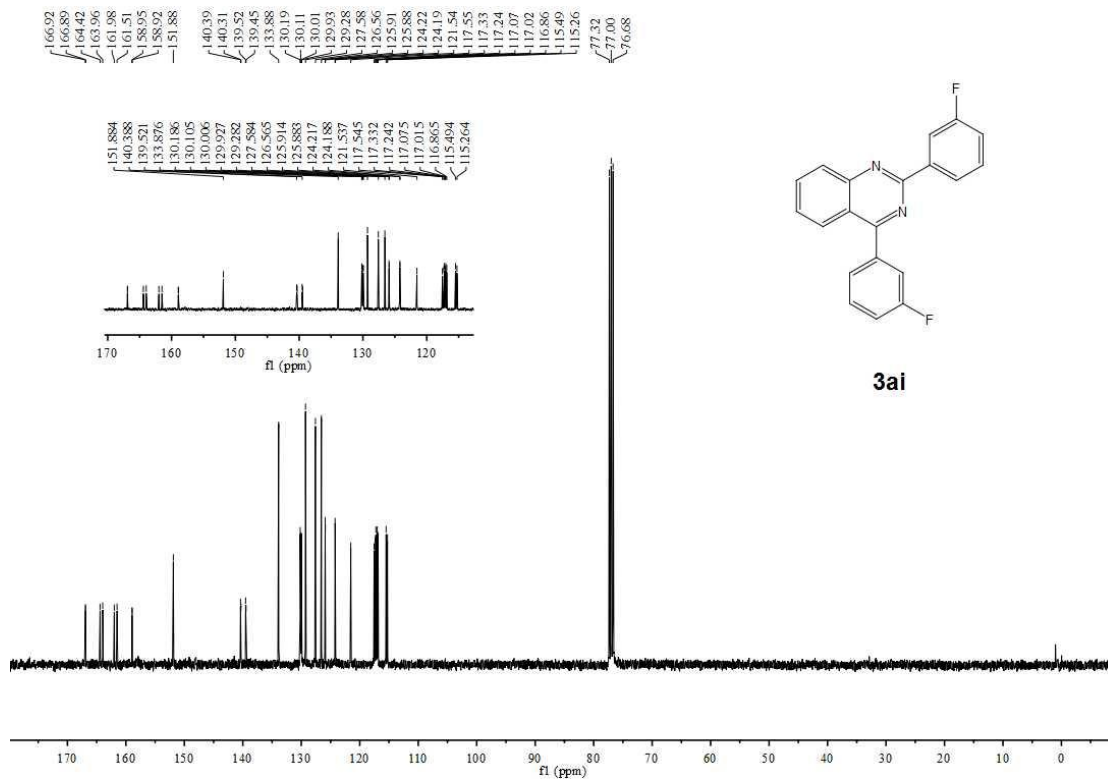

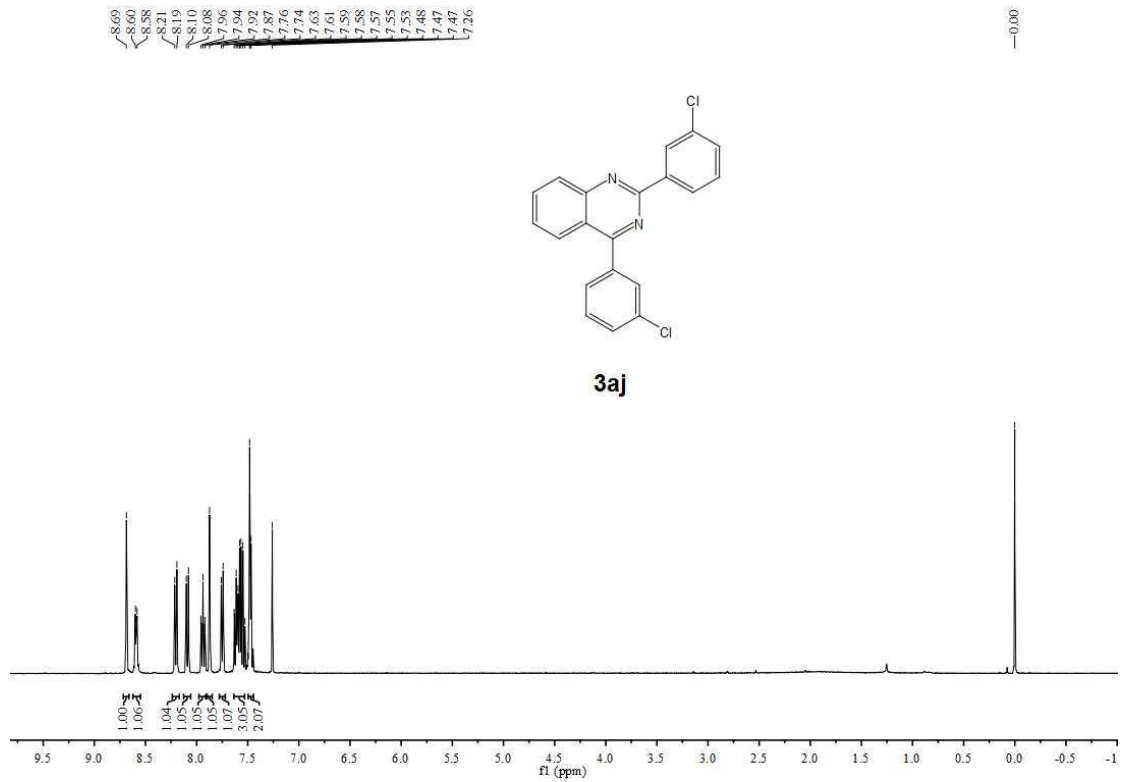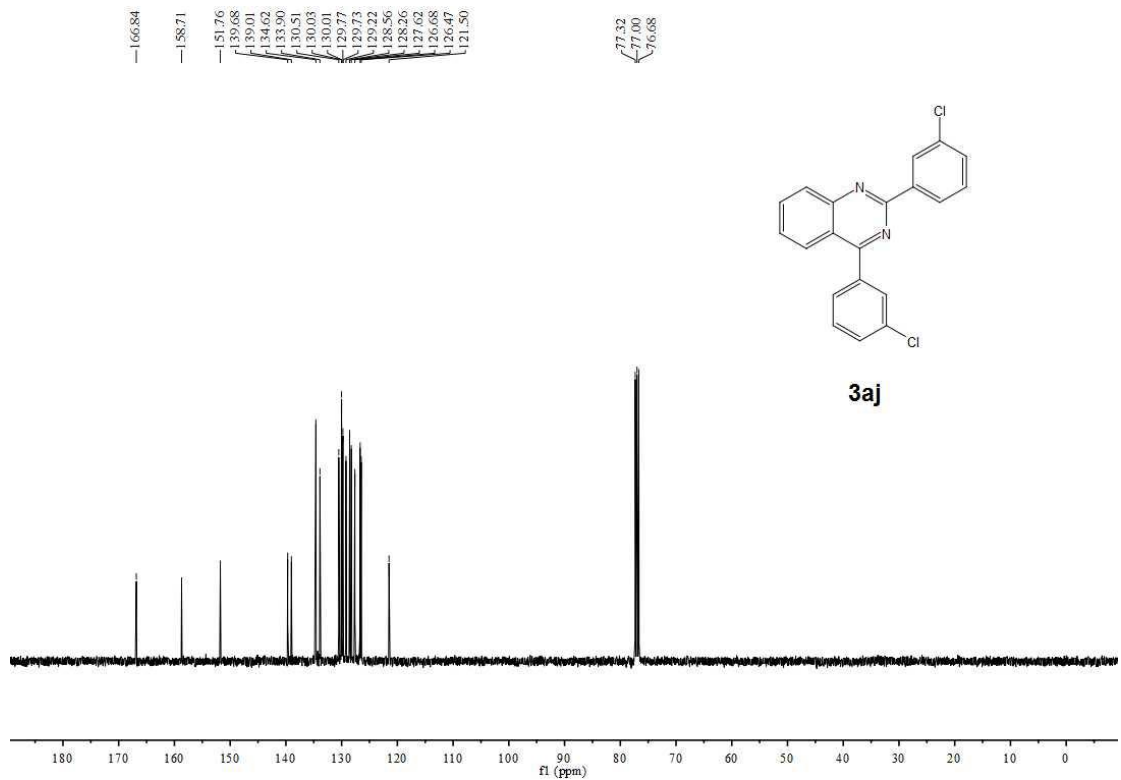

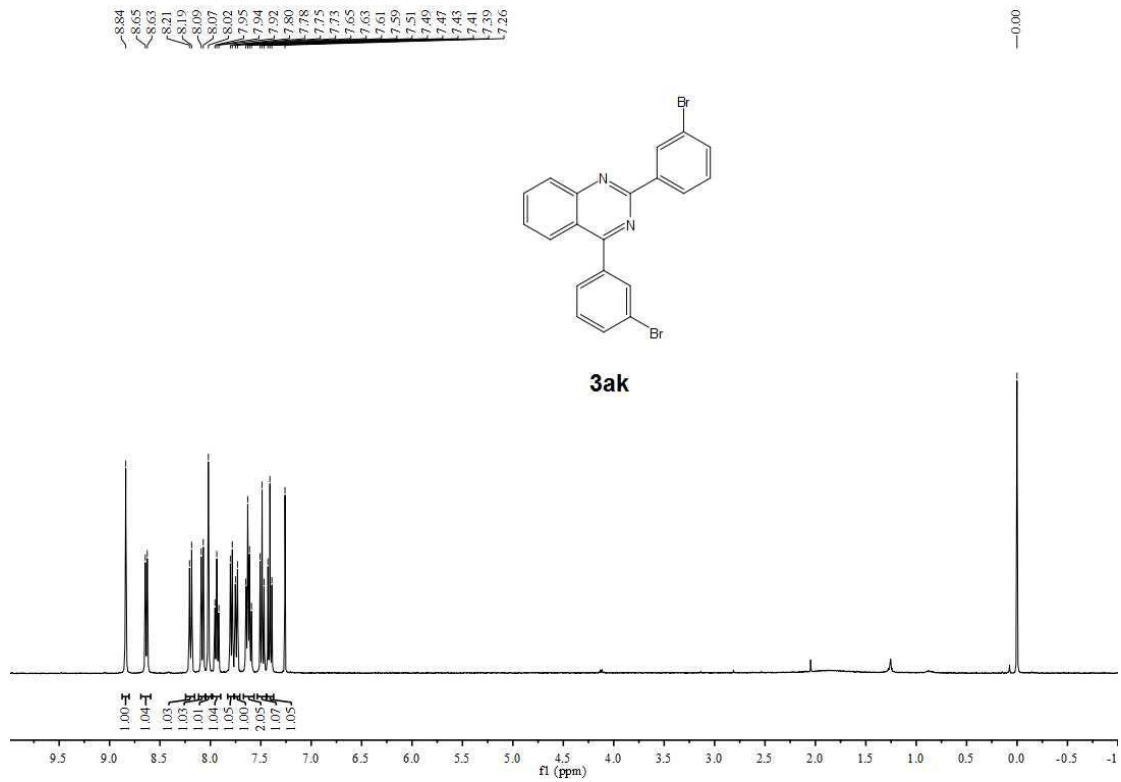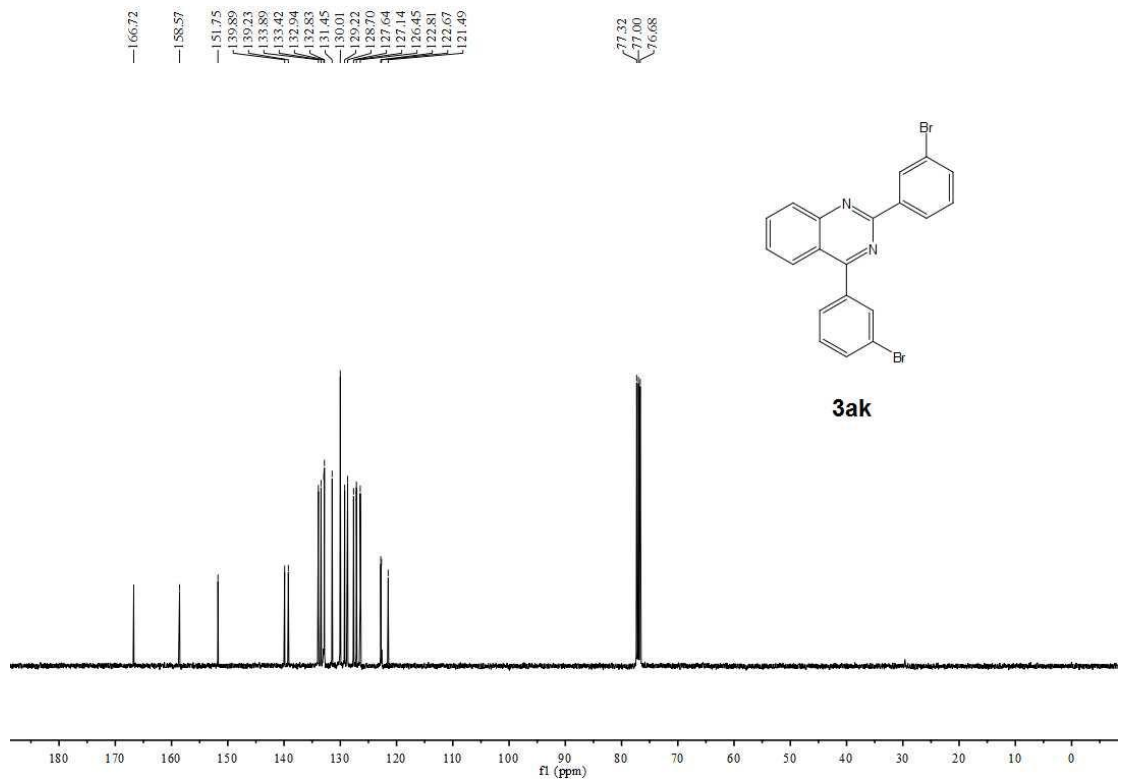

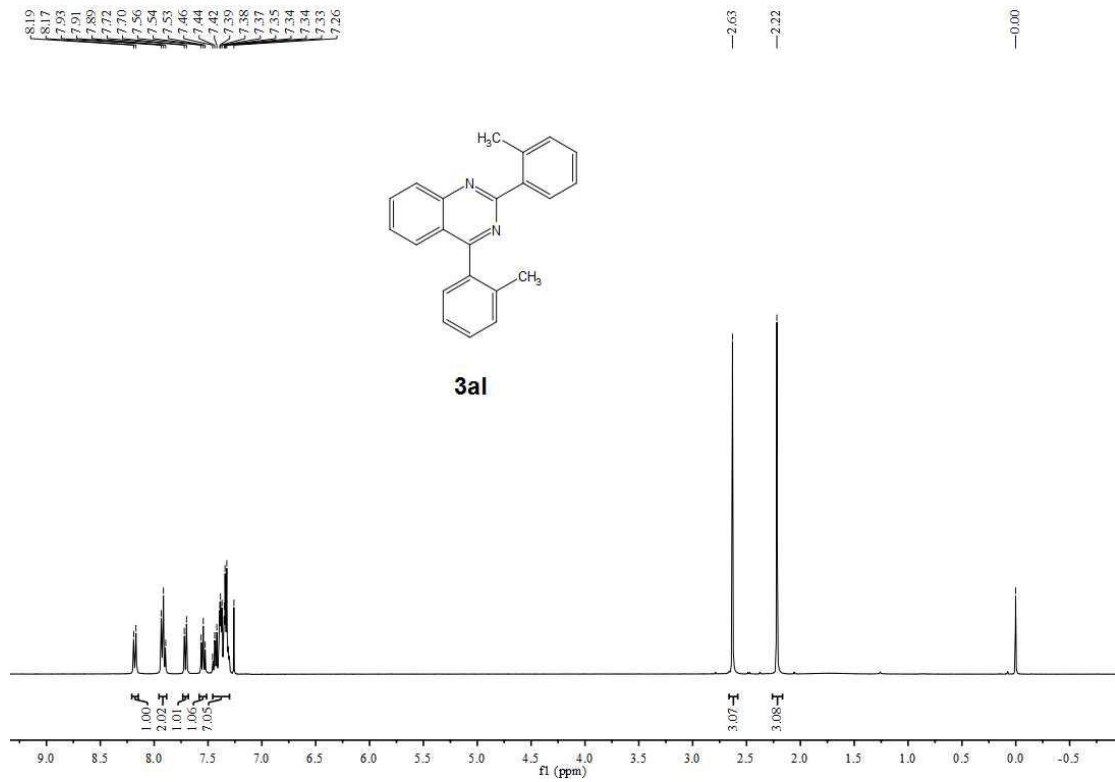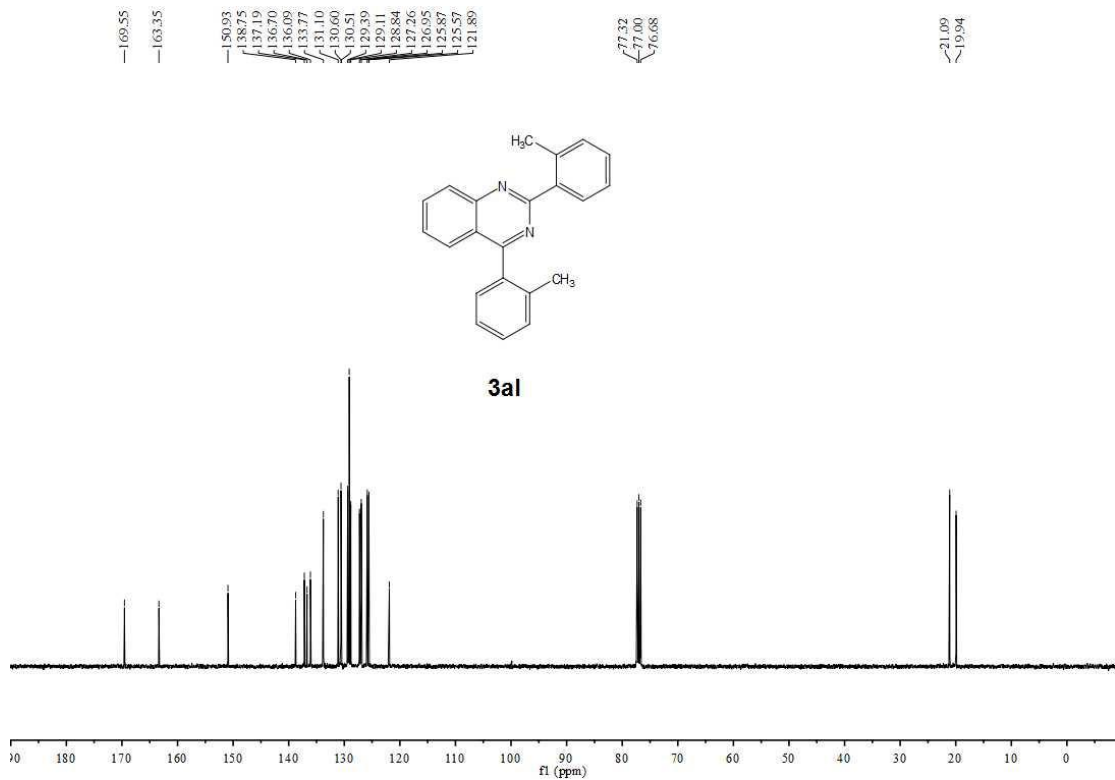



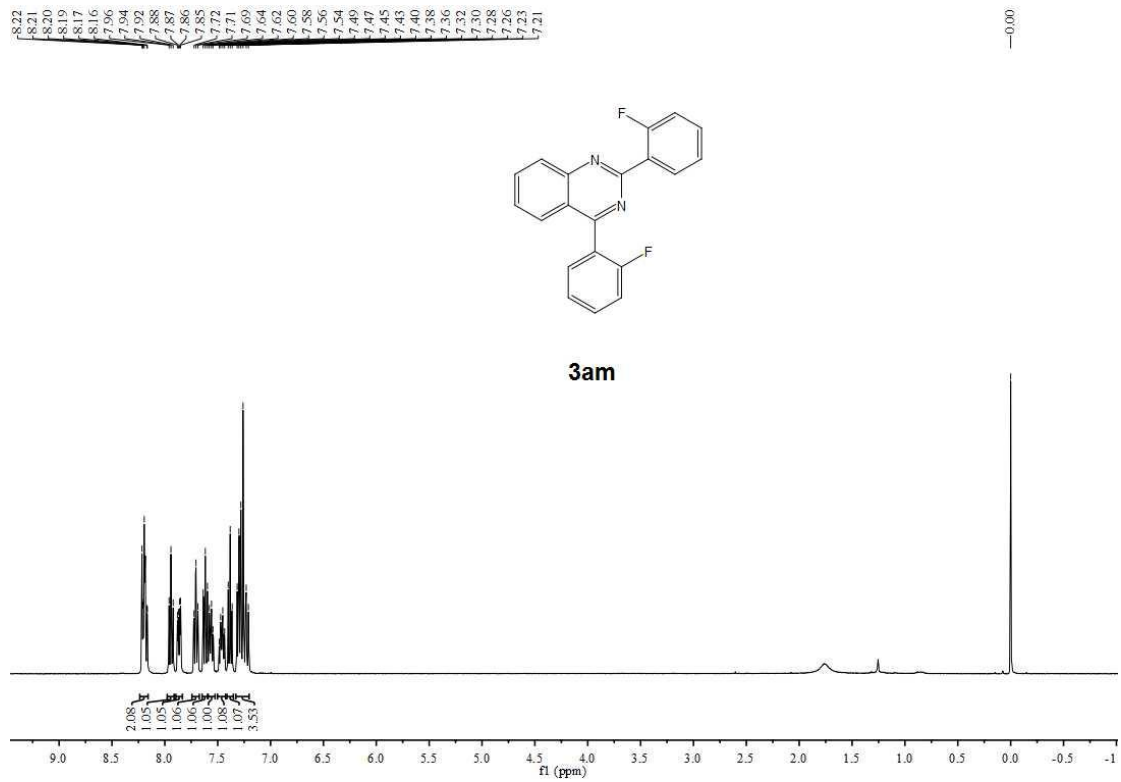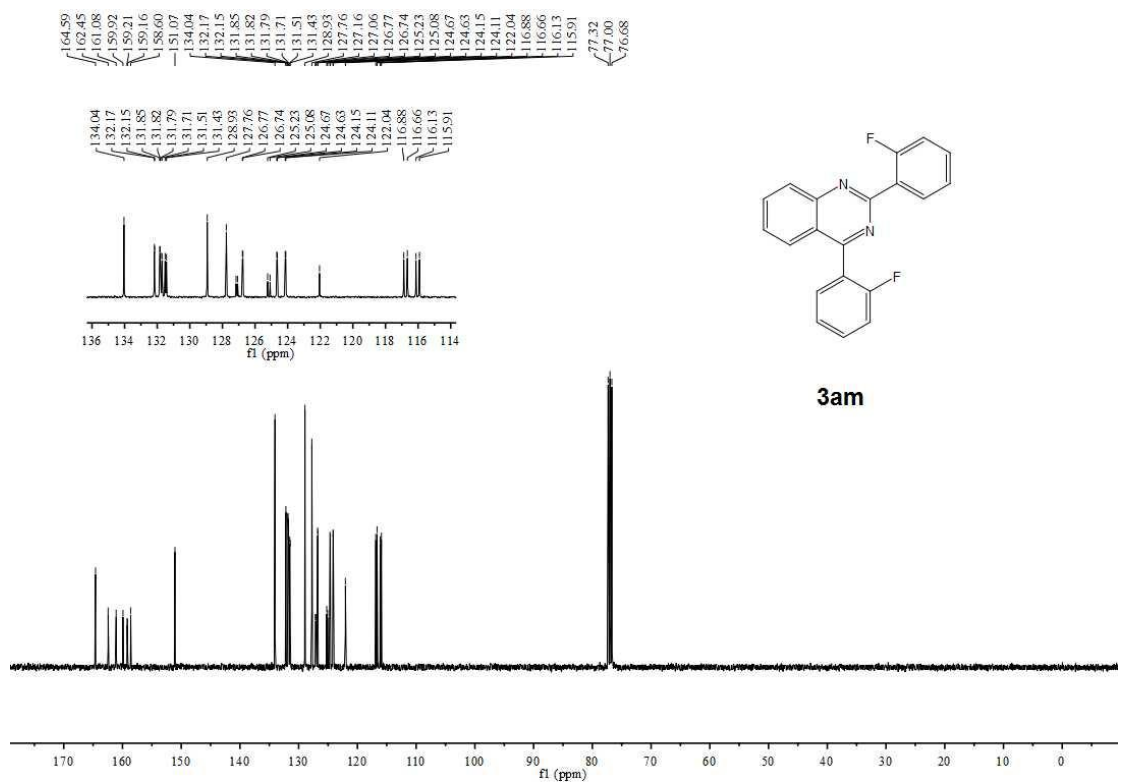

8.23  
8.21  
7.98  
7.96  
7.94  
7.90  
7.89  
7.88  
7.87  
7.74  
7.72  
7.64  
7.62  
7.60  
7.58  
7.56  
7.55  
7.54  
7.52  
7.52  
7.50  
7.48  
7.48  
7.46  
7.45  
7.41  
7.40  
7.39  
7.39  
7.26

0.00

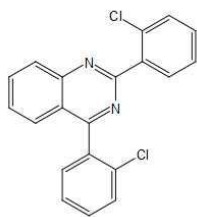

3an

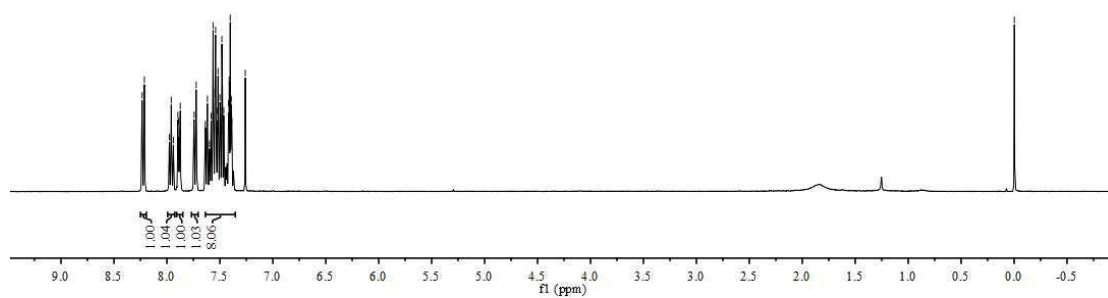

1.00  
1.04  
1.00  
1.03

8.06  
1.3819  
1.3594  
1.3414  
1.3292  
1.3278  
1.3169  
1.3101  
1.3063  
1.3038  
1.3019  
1.2984  
1.2988  
1.2709  
1.2690  
1.2682  
1.2678  
1.2188

77.32  
77.00  
76.68

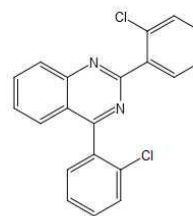

3an

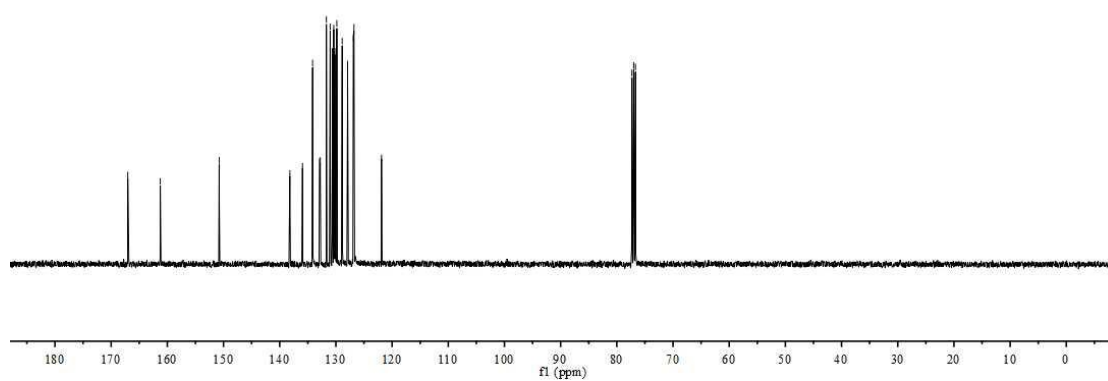

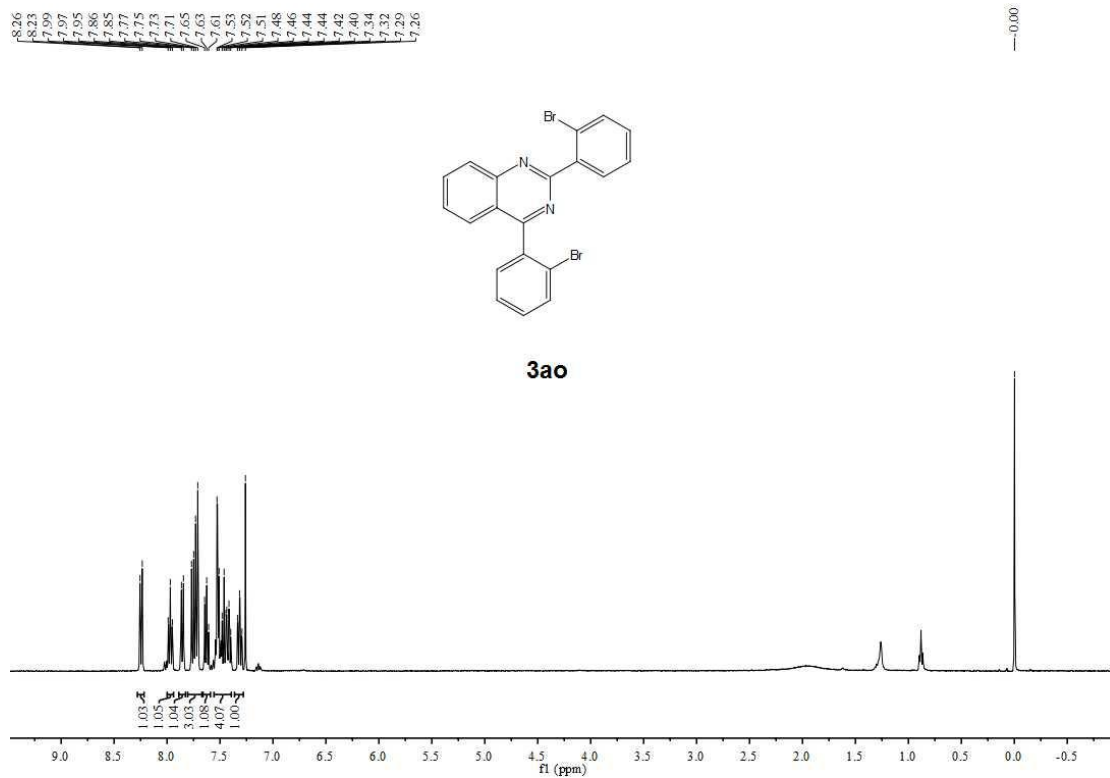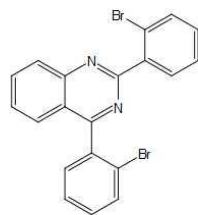

**3ao**

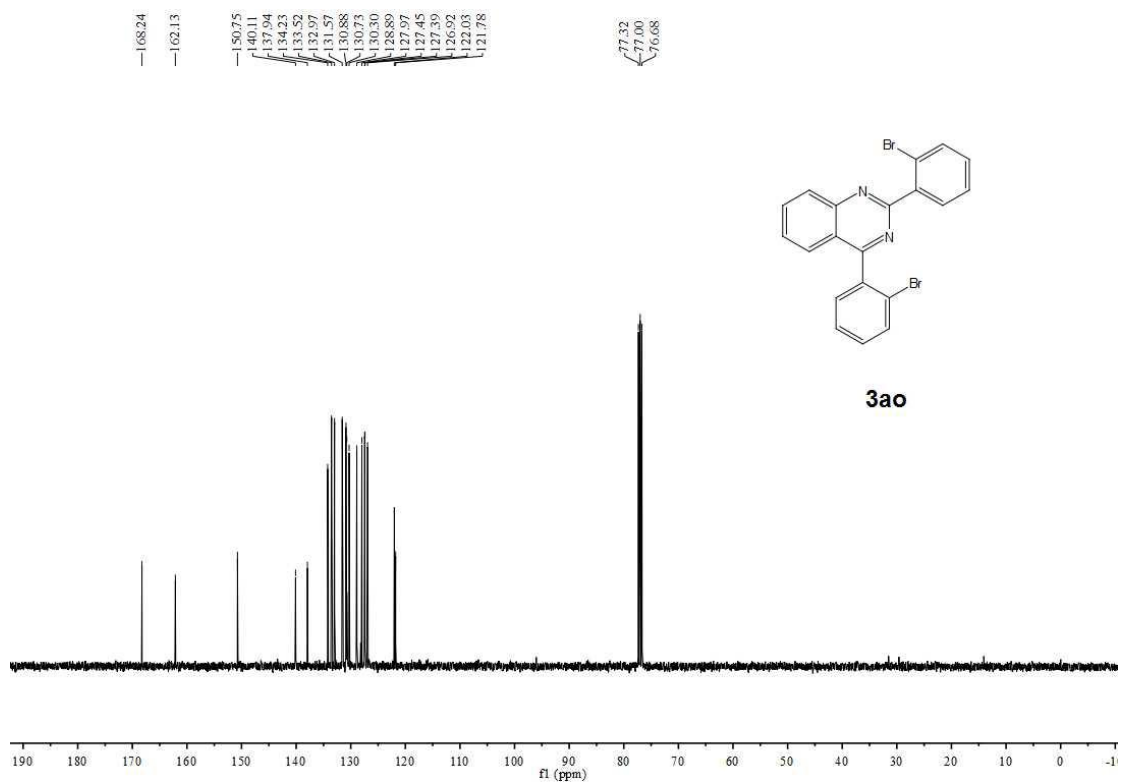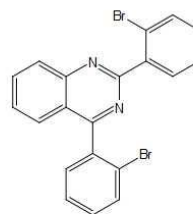

**3ao**

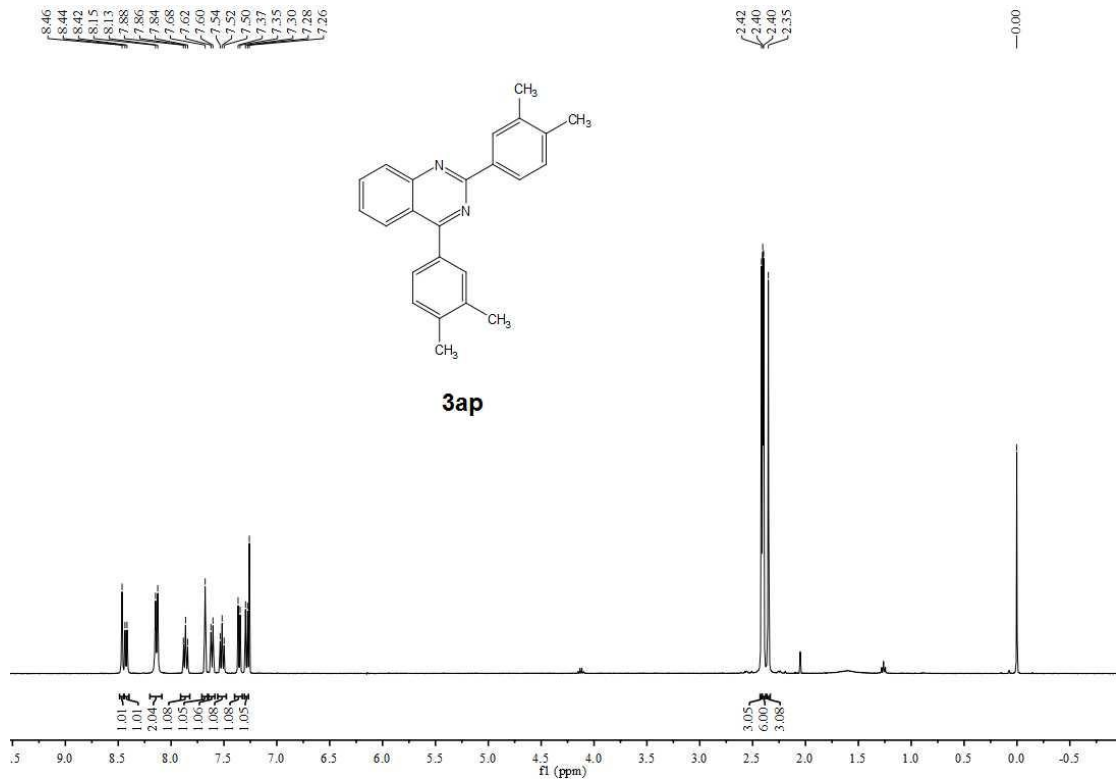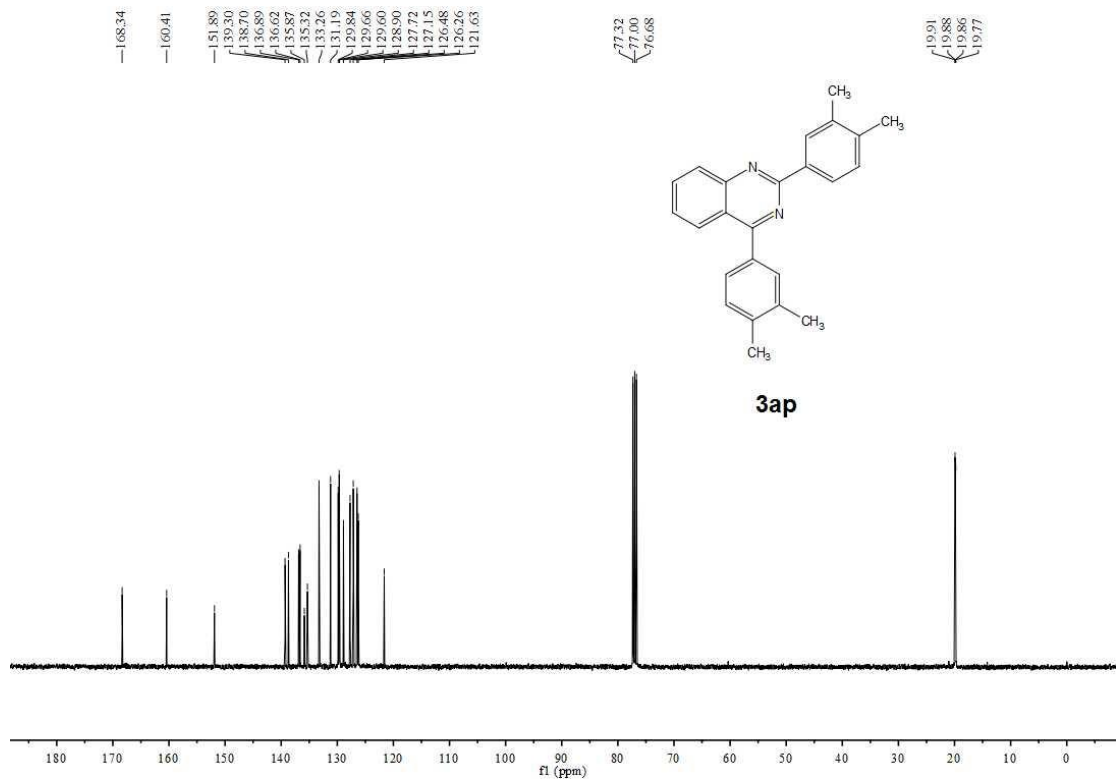

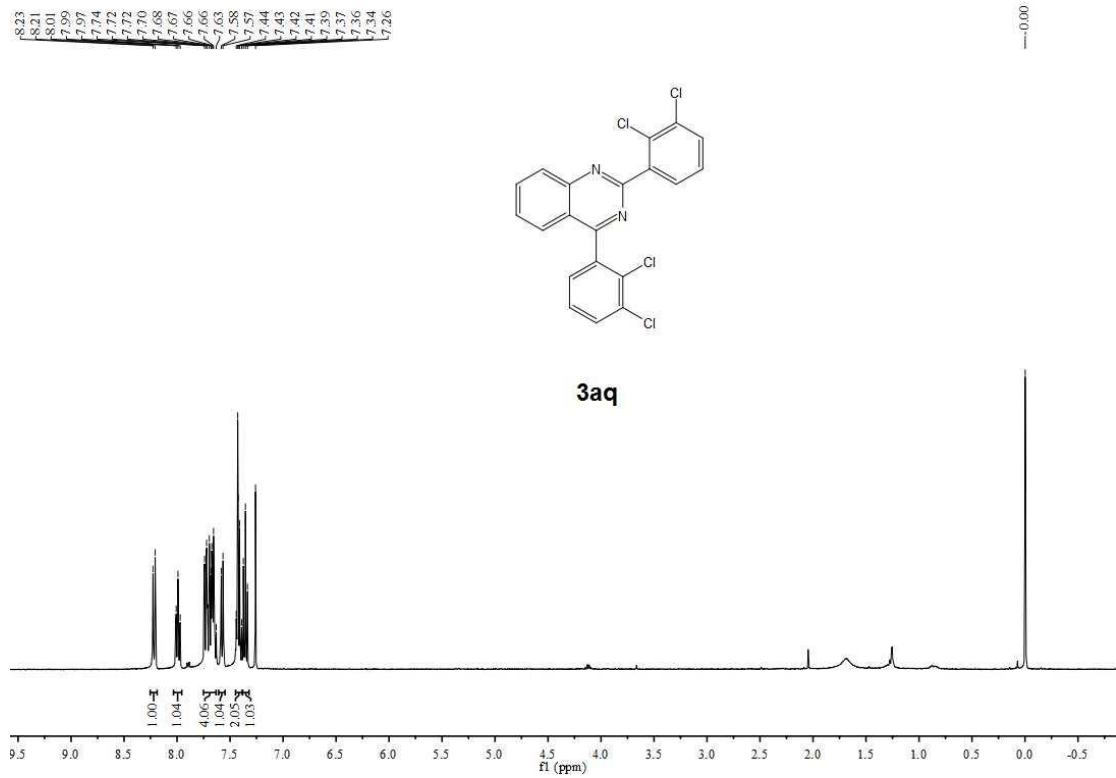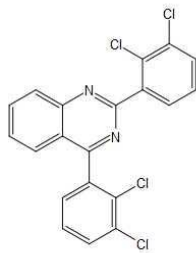

3aq

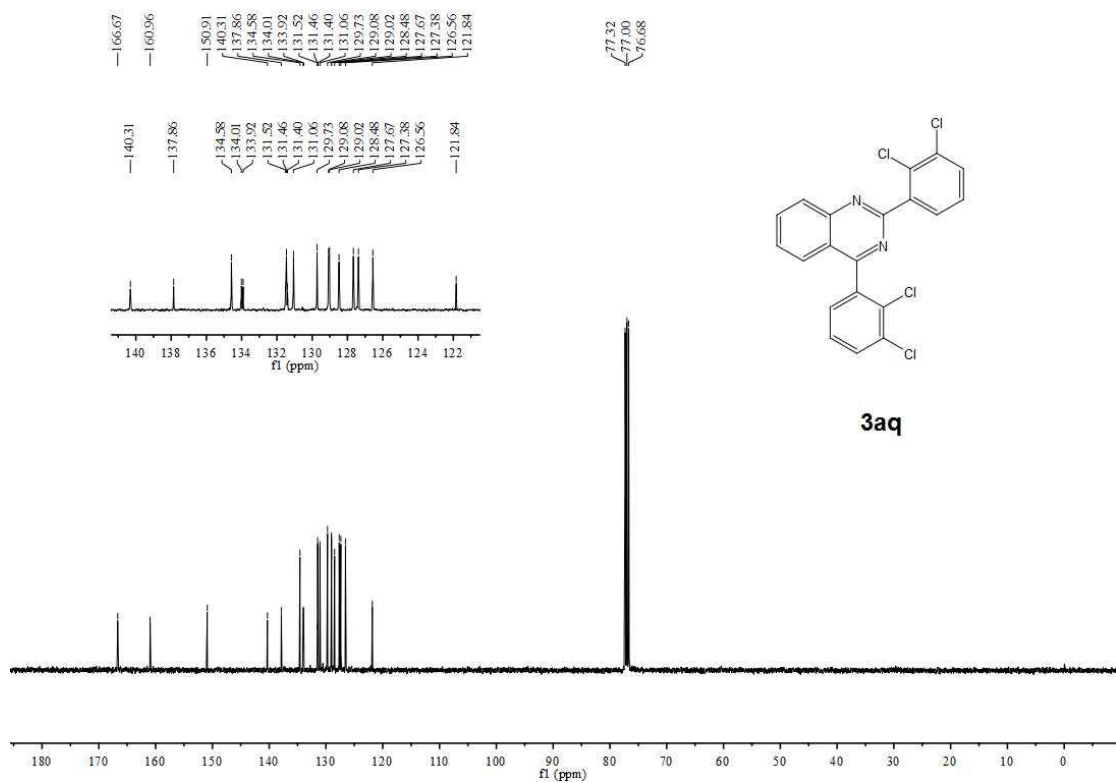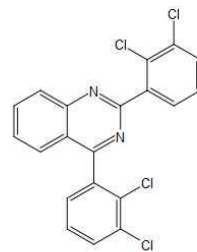

3aq

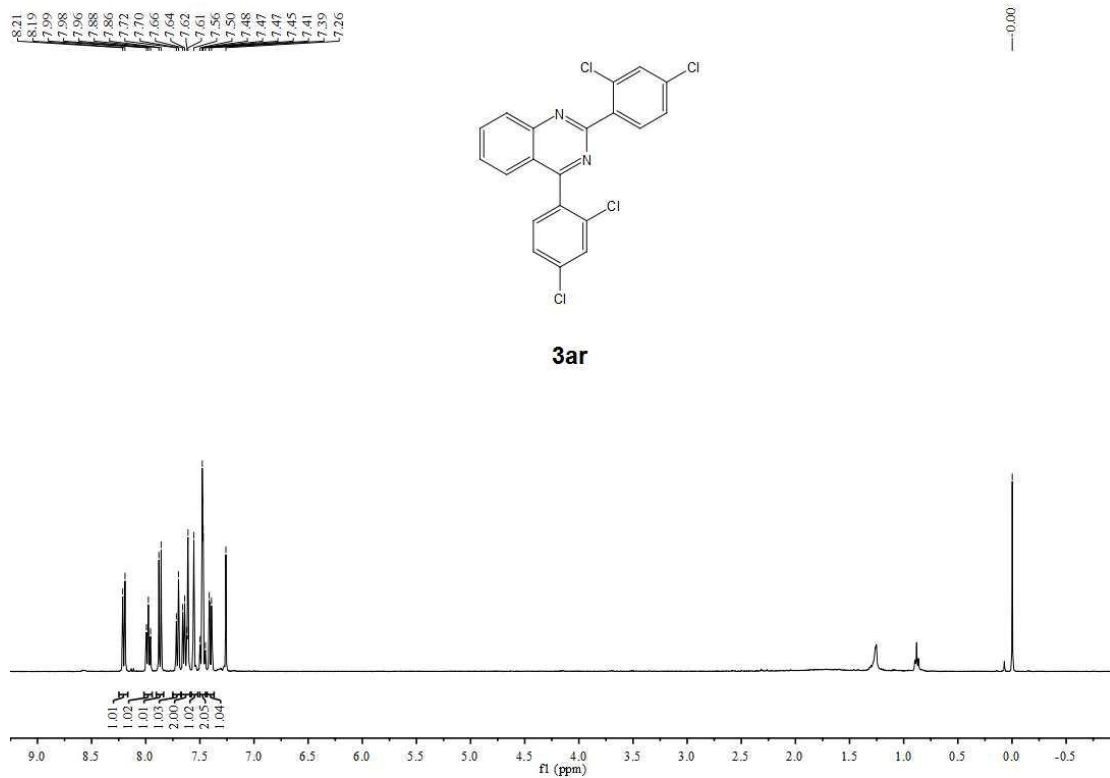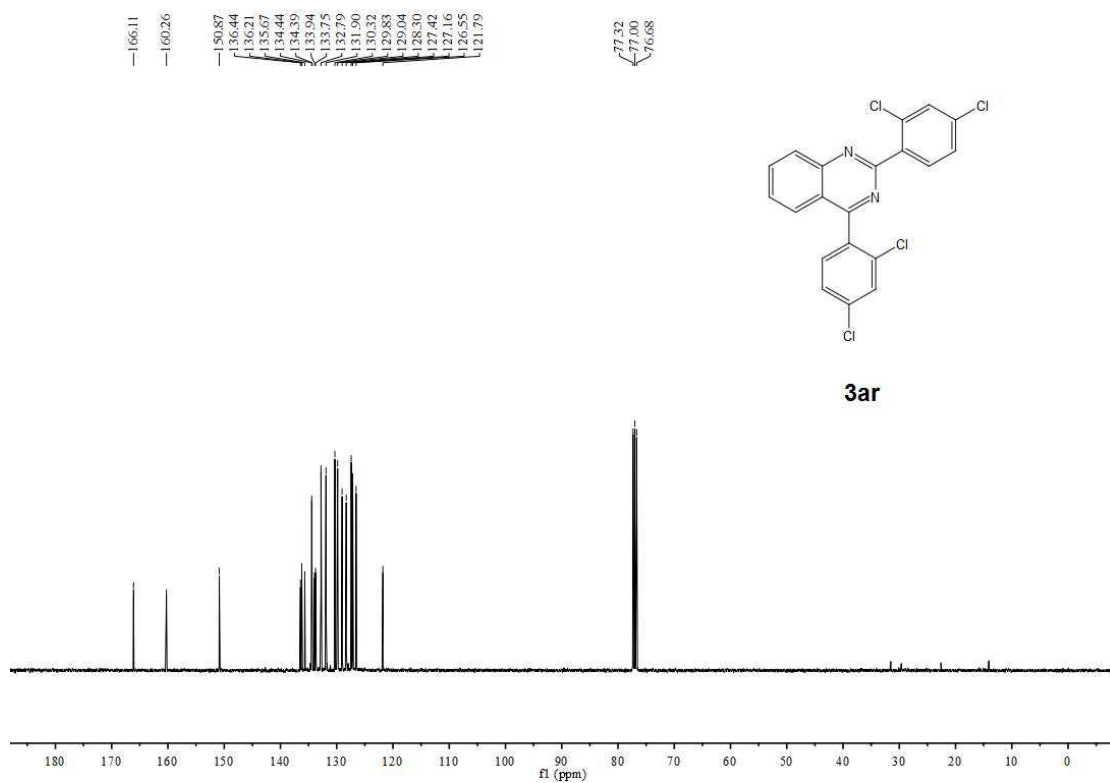

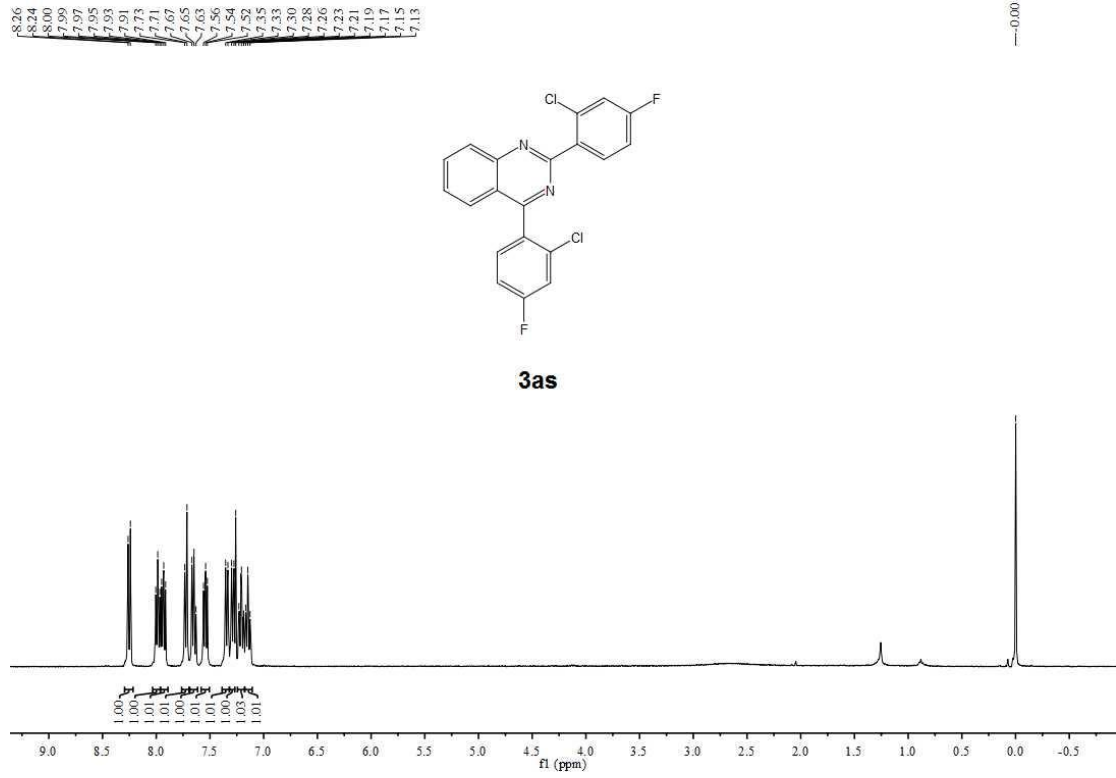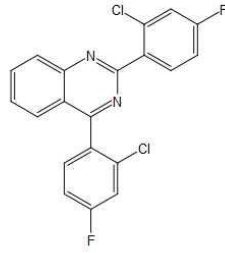

**3as**

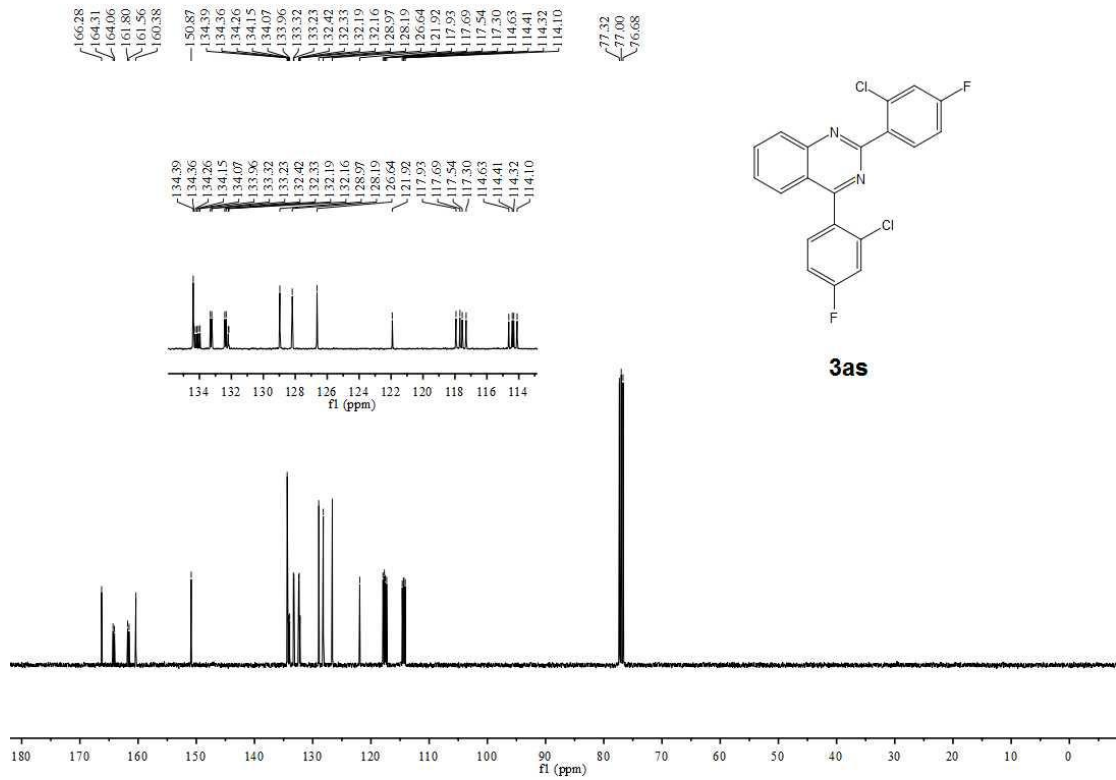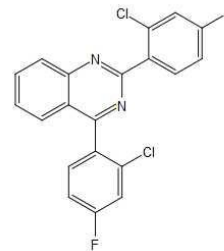

**3as**

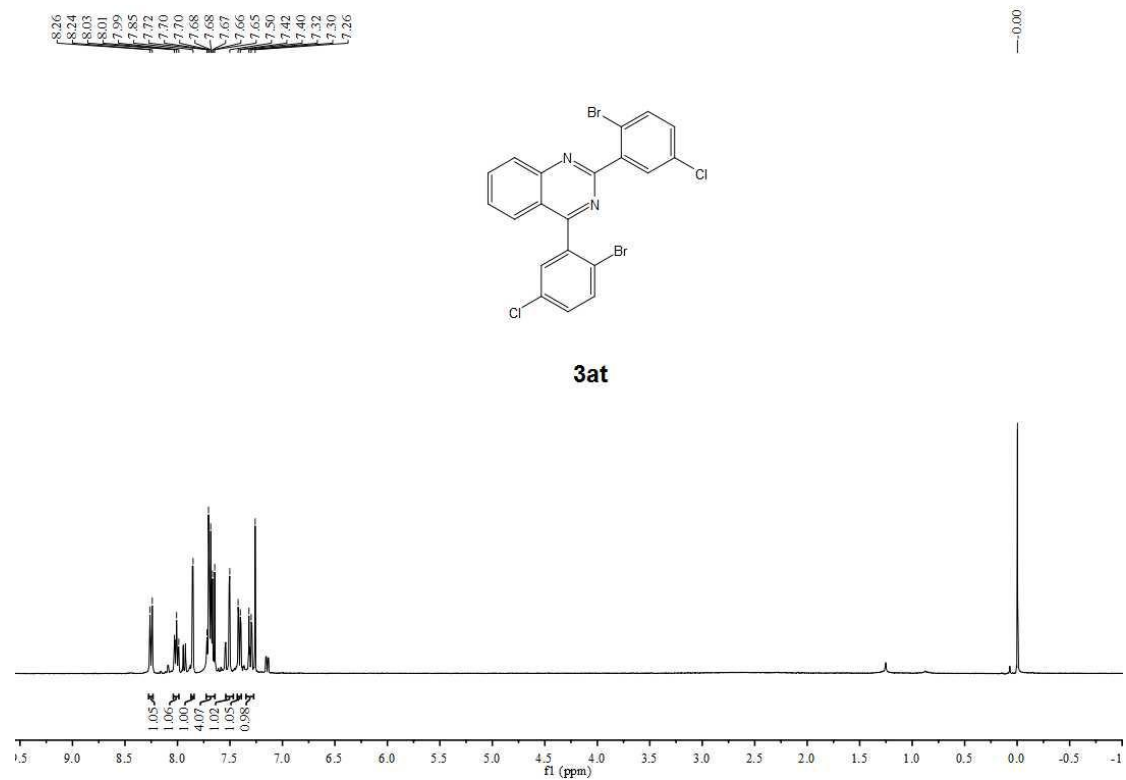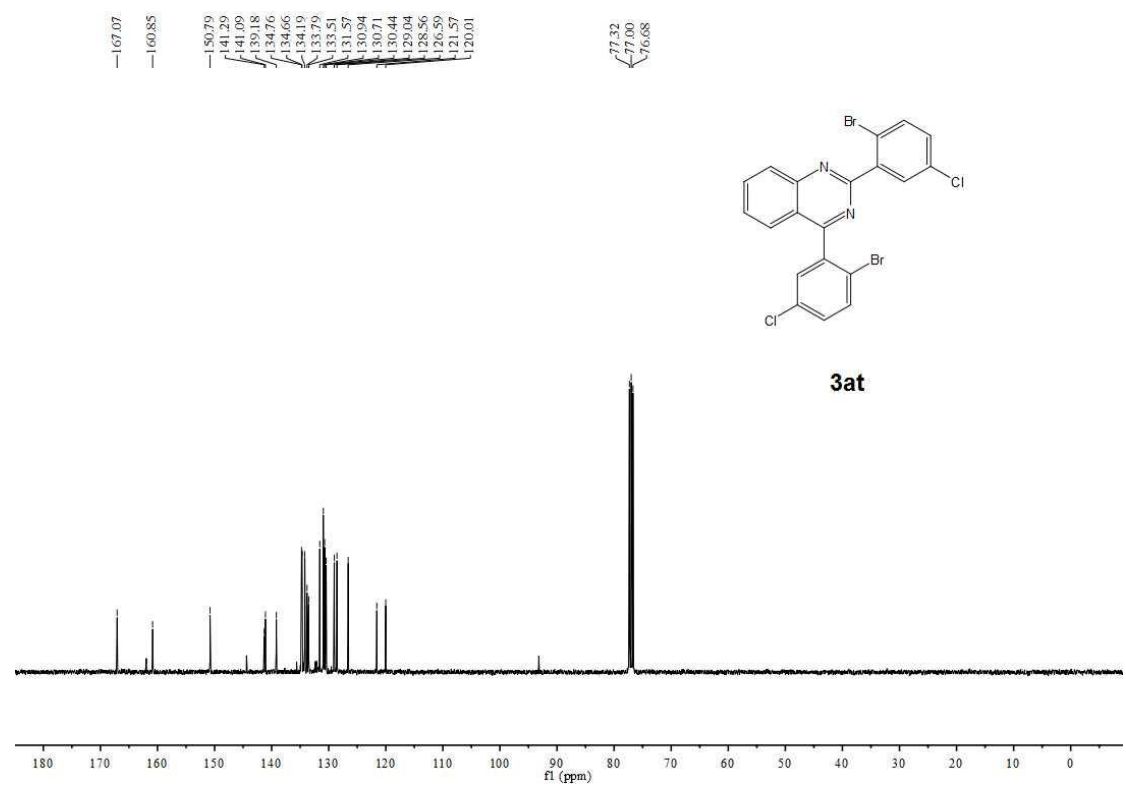



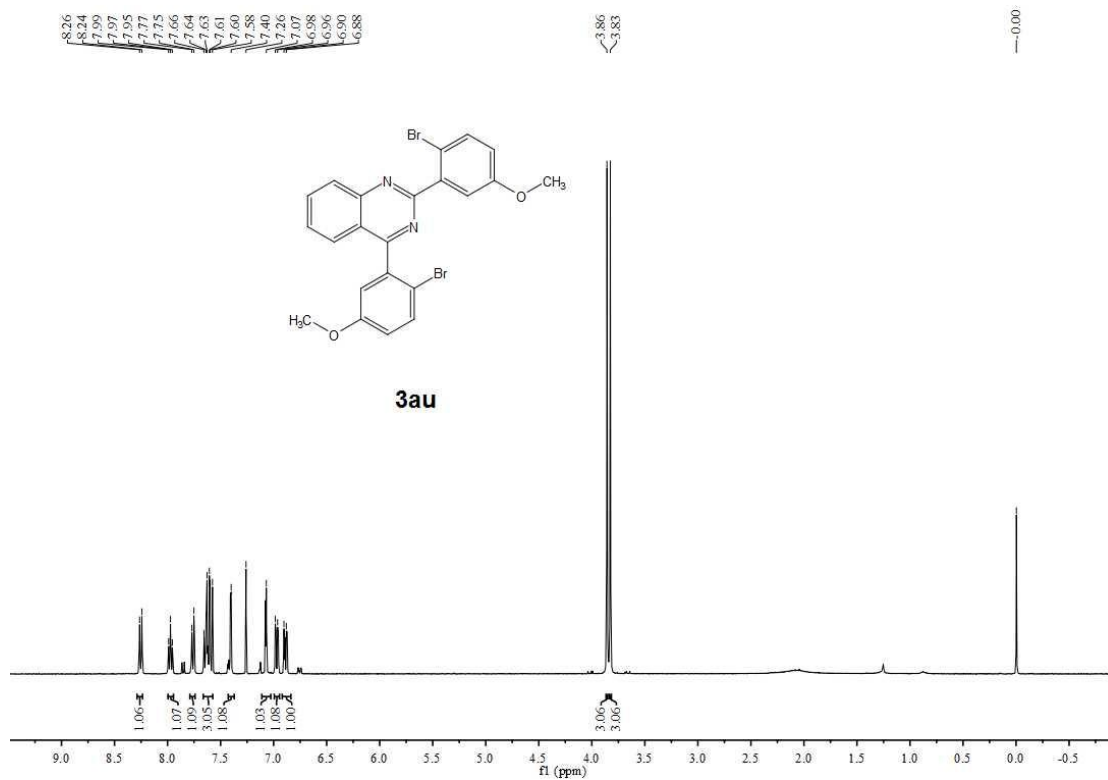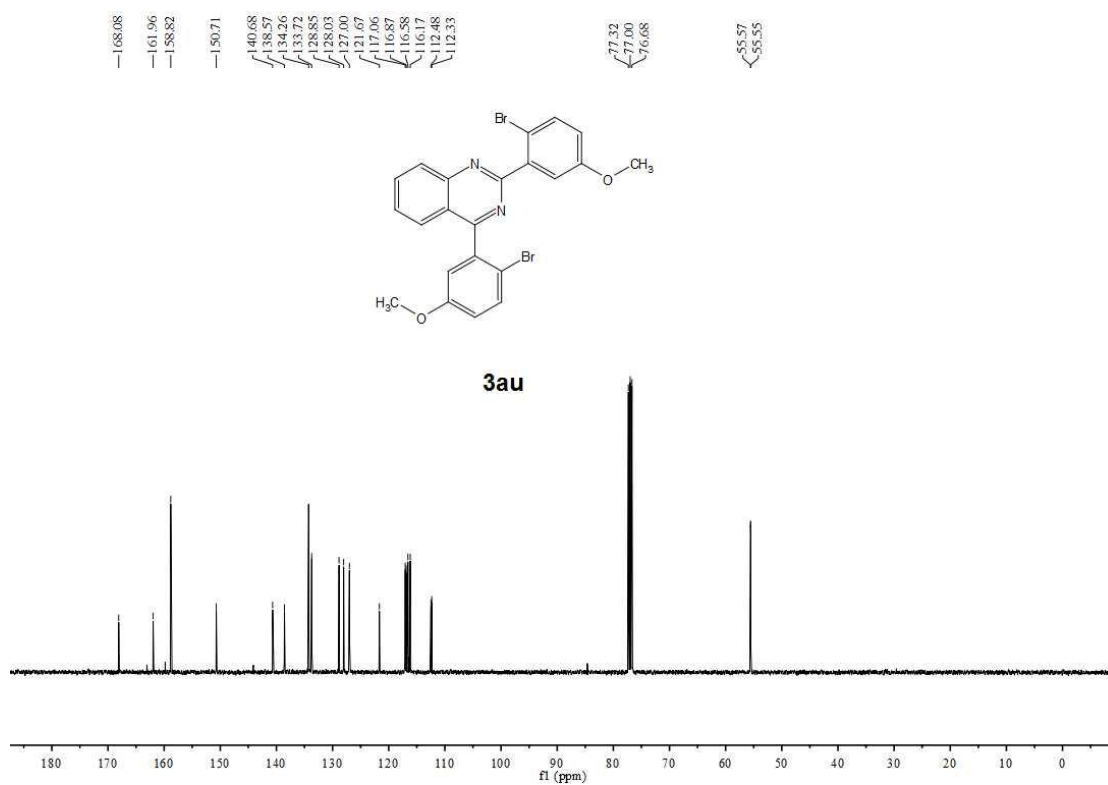

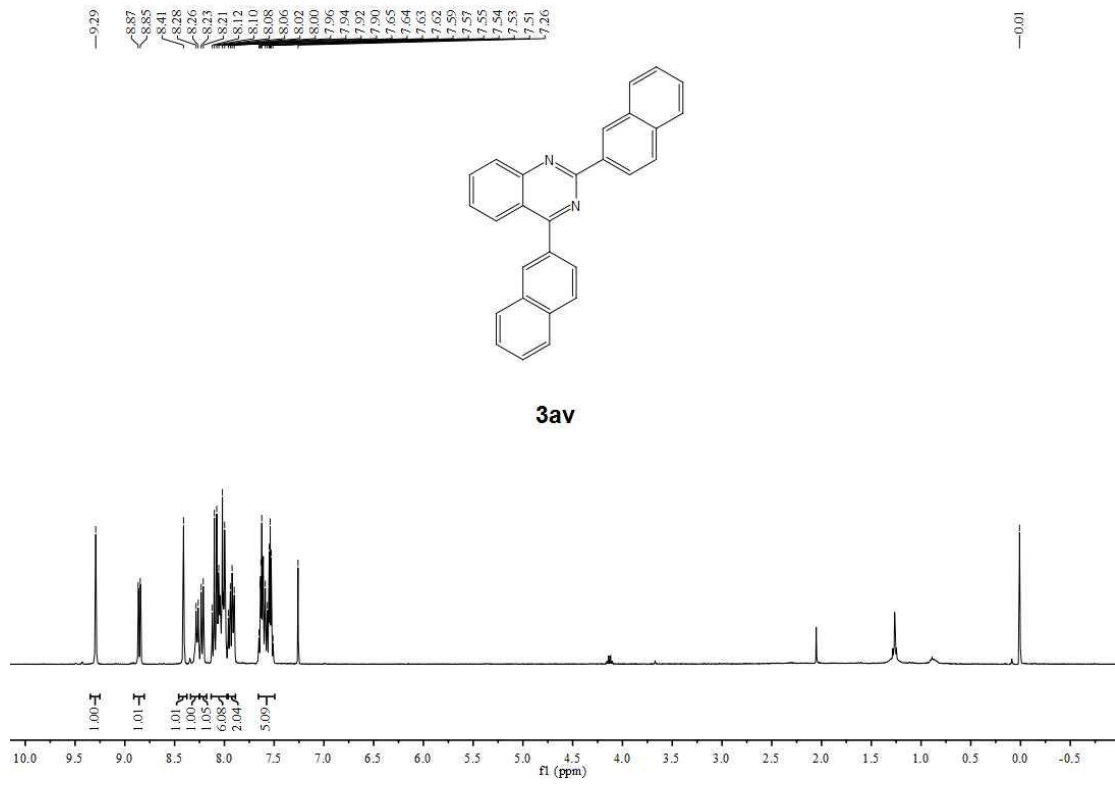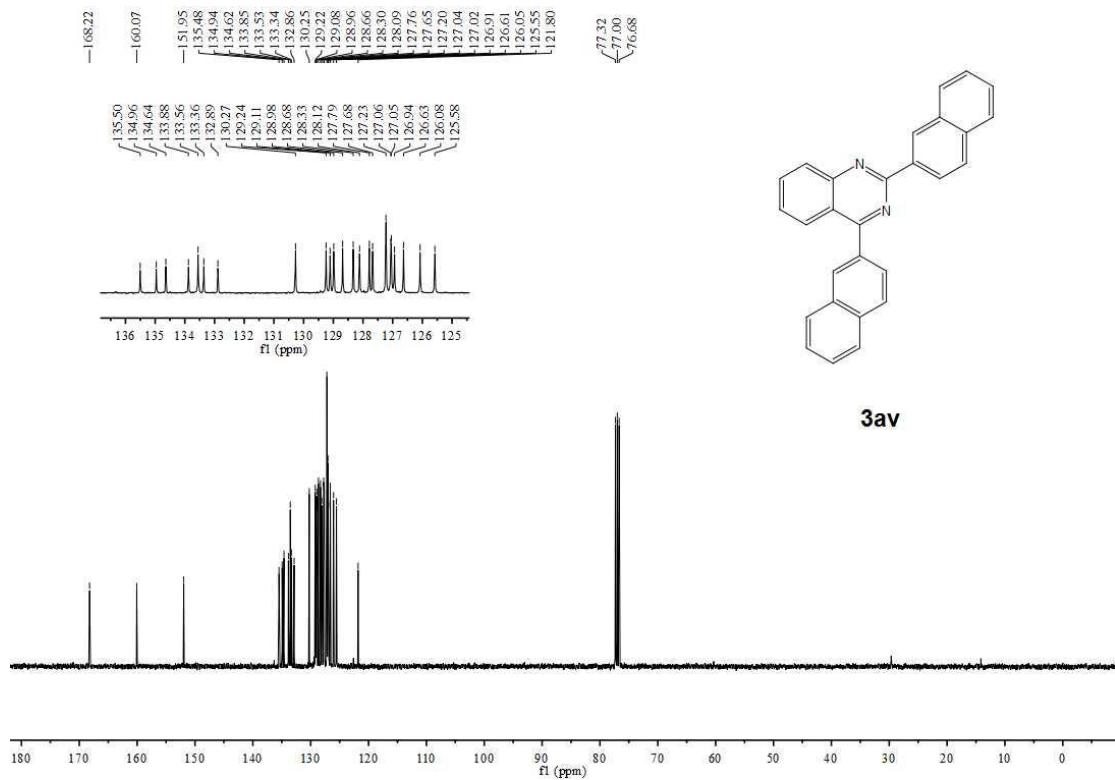

—9.48  
 8.64  
 8.62  
 8.12  
 8.10  
 7.95  
 7.94  
 7.93  
 7.92  
 7.91  
 7.90  
 7.64  
 7.62  
 7.60  
 7.57  
 7.55  
 7.54  
 7.53  
 7.51  
 7.50  
 7.26  
 —0.00

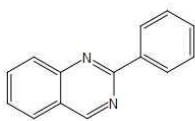

**6**

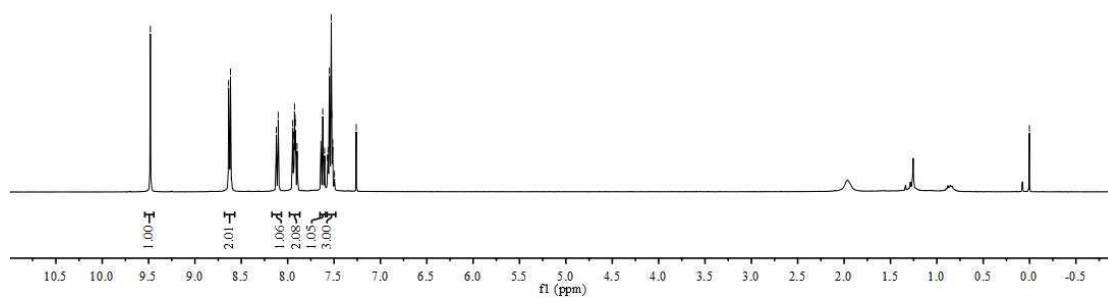

160.99  
 160.46  
 —150.70  
 137.93  
 134.11  
 130.60  
 128.61  
 128.58  
 128.56  
 127.25  
 127.09  
 123.56  
 77.32  
 77.00  
 76.08

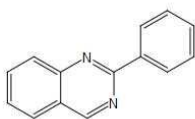

**6**

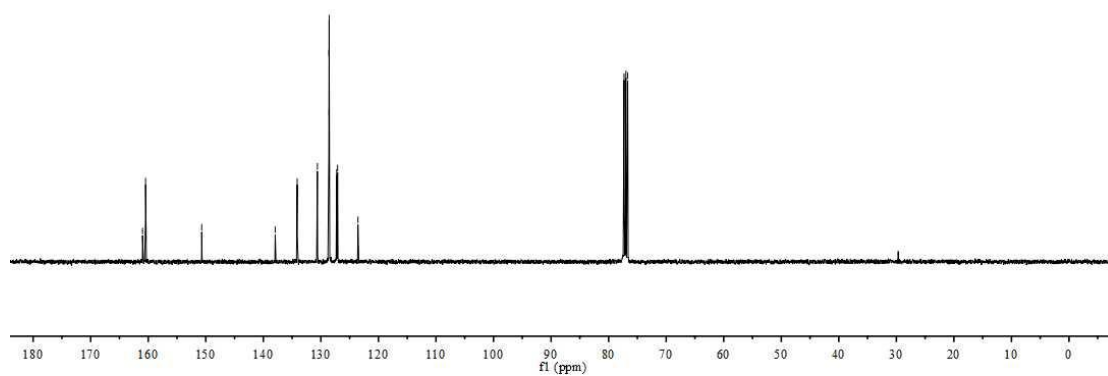

Supplement: c8gc02654h1.pdf [file c8gc02654h1.pdf]
